# Supplementary material for: Barriers to seeking consultation at public service and medical facilities among pregnant and postpartum women in Japan: a cross-sectional study
Source: PeerJ journal article supplement (doi:10.7717/peerj.19320), 2025-04-21
Supplement: rawdata.xls [file rawdata.xls]

## Sheet: Sheet1
ASC11	ASC12	ASC13	ASC14	BSC1S1	BSC1S2	Q5	Q7	Q8	Q9	Q202	Q486	Q511	Q512	Q513	Q514	Q515	Q516	Q517	Q518	Q521	Q522	Q526	Q5311	Q5312	Q5313	Q5314	Q5315	Q5316	Q5317	Q5318	Q5319	Q53110	Q53111	Q53112	Q53113	Q5321	Q5322	Q5323	Q5324	Q5325	Q5326	Q5327	Q5328	Q5329	Q53210	Q53211	Q53212	Q53213	Q5361
0	0	1	0			2	6	1	4	1	1	2	2	1	2	2	1	2	1	1	2	1
				3	3	2	2	1	4	0	1	2	2	2	2	2	1	2	2	2	2	2
				1	3	2	4	1	4	1	1	2	2	2	2	2	1	1	2	2	2	2
				4	3	2	6	1	4	0	1	1	2	1	1	2	1	1	2	3	3	3	1	1	0	1	1	0	0	0	0	0	0	0	0	1	1	0	1	1	0	0	0	0	0	0	0	0	1
0	0	1	0			2	9	1	4	3	1	2	2	2	2	2	1	1	2	2	2	2
0	0	1	0			2	5	1	4	2	3	2	1	2	1	1	1	1	2	2	2	2
0	0	1	0			2	4	2	4	2	2	2	2	2	2	2	2	1	2	2	2	2
				7	1	2	5	1	4	1	1	1	1	2	2	2	1	1	2	2	2	1
				7	1	2	3	1	4	1	2	2	1	2	1	1	1	2	2	2	2	2
				1	3	2	6	1	4	1	1	2	2	2	2	2	2	2	1	2	2	2
				7	1	2	4	1	4	2	1	2	2	2	2	2	2	2	1	2	2	2
				7	1	2	8	1	4	2	1	2	1	1	2	2	1	1	2	2	2	2
0	0	1	0			2	7	1	4	1	2	1	1	2	1	2	2	1	2	2	2	1
1	0	0	0			2	8	1	4	2	1	2	2	2	2	2	1	2	2	2	2	1
0	0	1	0			2	6	1	4	1	1	2	2	1	2	2	1	2	2	2	2	2
				5	3	2	6	1	4	1	2	1	2	1	2	1	2	1	2	2	2	2
				3	3	2	6	1	4	1	3	2	2	2	2	2	2	2	2	2	2	2
0	0	1	0			2	6	1	4	1	1	1	1	1	2	2	1	2	2	2	2	2
0	0	1	0			2	5	1	4	3	3	2	2	2	2	2	2	2	2	2	2	2
0	0	1	0			2	7	1	4	1	1	2	1	1	2	1	1	1	2	2	2	2
0	0	1	0			2	7	1	2	2	1	2	2	2	2	2	2	2	2	3	3	3	0	0	0	1	0	0	0	0	0	0	0	0	0	0	0	0	1	0	0	0	0	0	0	0	0	0	0
0	0	1	0			2	5	1	2	1	2	2	1	1	1	1	1	2	2	2	2	2
0	0	1	0			2	6	1	4	1	1	1	2	1	2	2	1	1	2	2	2	1
0	0	1	0			2	8	1	4	2	2	2	2	2	2	2	2	2	2	2	2	2
0	0	1	0			2	6	1	4	1	2	2	2	2	2	2	1	1	2	2	2	1
				7	1	2	7	1	4	1	1	1	2	2	1	2	2	1	2	2	2	2
0	0	1	0			2	4	1	2	1	1	2	1	2	2	2	2	1	2	2	2	2
0	0	1	0			2	7	1	2	2	1	2	1	2	2	2	1	2	2	1	2	1
				3	3	2	5	1	4	0	1	1	1	1	1	1	1	1	1	1	2	1
				7	1	2	7	1	4	2	2	2	2	2	2	2	2	1	2	1	3	1														0	0	0	1	0	0	0	0	0	0	0	0	0
				7	1	2	5	1	2	2	4	2	1	1	2	2	1	2	2	1	1	1
0	0	1	0			2	5	1	4	2	2	2	2	2	2	2	2	2	2	2	2	2
0	0	1	0			2	8	1	4	2	1	2	1	2	2	2	2	2	2	2	2	2
0	0	1	0			2	7	1	4	1	2	2	1	1	2	2	1	1	2	1	1	1
0	0	1	0			2	6	1	2	2	2	2	2	2	2	2	1	2	2	2	2	1
				7	1	2	7	1	4	3	1	1	2	1	2	2	1	1	2	1	2	1
				7	1	2	3	1	4	2	1	2	1	2	2	2	2	2	2	2	2	2
				1	3	2	6	1	4	3	2	2	1	2	2	2	2	1	2	2	2	2
				7	1	2	6	2	4	1	1	1	2	1	2	2	1	1	1	3	3	1	0	0	1	1	0	0	0	0	0	0	0	0	0	0	0	1	1	0	0	0	0	0	0	0	0	0
				7	1	2	6	1	4	1	1	2	2	2	2	2	2	2	2	2	2	1
				7	1	2	5	1	4	1	1	2	2	2	2	2	2	2	2	1	2	1
				7	1	2	5	1	4	2	2	2	1	1	1	1	1	1	2	1	2	1
0	0	0	1			2	5	2	4	2	3	2	2	2	1	2	2	2	2	2	2	2
				4	3	2	4	1	4	0	1	1	2	1	2	2	1	2	2	2	2	2
0	0	1	0			3	5	1	4	1	3	1	1	1	1	1	1	1	1	2	2	2
0	0	1	0			2	7	1	4	1	2	1	2	1	2	2	2	2	2	2	2	3																											0
0	0	1	0			2	3	1	4	1	1	2	1	1	2	2	1	1	2	3	2	3	0	0	1	0	0	0	1	0	1	0	0	0	0														0
0	0	1	0			2	9	1	4	1	2	1	2	2	2	2	2	2	2	1	1	2
0	0	1	0			2	7	1	2	1	1	2	2	2	2	2	2	1	2	1	2	2
				7	1	2	3	1	4	2	2	2	2	2	2	2	2	2	2	3	3	3	0	0	1	0	0	0	0	0	0	0	0	0	0	0	0	1	0	0	0	0	0	0	0	0	0	0	0
				7	1	2	6	1	4	1	1	2	2	2	2	2	2	1	2	2	2	2
				7	1	2	6	1	4	2	2	2	2	2	2	1	1	2	2	2	2	2
				7	1	2	4	2	2	2	2	2	2	2	2	2	2	2	2	2	1	2
				7	1	2	6	1	4	2	1	2	2	2	2	2	2	2	2	2	2	2
0	0	1	0			2	5	1	4	2	1	2	2	1	2	2	1	1	1	2	2	1
0	0	1	0			2	4	1	4	1	1	2	1	2	2	2	1	1	2	2	2	1
				7	1	2	3	1	4	2	2	2	1	2	1	1	2	1	2	3	3	3	0	1	0	0	0	0	0	0	0	0	0	0	0	0	1	0	0	0	0	0	0	0	0	0	0	0	0
0	0	1	0			2	6	1	4	1	1	1	2	2	2	2	2	2	2	1	2	1
0	0	1	0			2	6	1	4	1	2	2	2	1	2	2	2	1	2	2	2	2
				7	1	2	6	1	4	1	2	1	2	1	1	2	1	1	2	1	2	1
				7	1	2	8	1	4	1	1	2	2	2	2	2	1	1	2	2	2	2
				7	1	2	3	1	4	1	1	2	2	2	2	2	2	2	2	2	2	1
				7	1	2	6	1	4	3	2	2	2	2	2	2	2	2	2	2	2	1
1	0	0	0			2	5	1	4	2	3	1	1	1	1	1	1	1	1	2	2	2
0	0	0	1			2	3	1	4	3	1	2	2	2	2	2	2	2	2	2	2	2
				7	1	2	6	1	4	2	2	2	2	2	2	2	2	2	2	2	2	2
				4	3	2	5	1	4	0	2	1	1	1	1	2	1	1	2	2	2	1
1	0	0	0			2	7	1	4	1	1	2	2	2	2	2	1	2	2	2	2	1
				7	1	2	6	2	4	2	3	2	1	1	2	2	1	2	1	2	2	1
				7	1	2	7	1	4	2	2	2	1	1	1	1	1	1	1	2	2	1
				5	3	2	4	1	4	0	1	1	1	1	2	2	1	2	2	2	2	1
				7	1	2	5	1	4	2	2	2	2	2	2	2	1	2	2	1	1	2
1	0	0	0			2	8	1	4	1	1	1	2	1	2	2	1	2	2	2	2	2
0	0	1	0			2	7	1	2	4	1	2	2	2	2	2	1	1	2	2	2	2
				7	1	2	5	1	4	2	2	2	1	1	2	2	2	1	2	2	2	2
				3	3	2	5	1	4	1	3	1	2	2	1	2	1	1	2	2	2	2
0	0	1	0			2	6	1	4	1	1	2	2	2	2	2	2	2	2	2	2	2
				7	1	2	4	1	4	1	1	2	1	2	2	2	1	1	2	2	1	1
				7	1	2	4	2	2	1	2	2	2	2	2	2	2	2	2	2	2	2
0	0	1	0			2	7	1	4	1	2	2	1	2	2	2	1	1	2	2	1	1
				7	1	2	6	1	4	2	1	2	2	2	2	2	2	2	2	2	2	2
				7	1	2	6	1	4	2	2	2	1	2	2	2	1	2	2	2	2	2
				7	1	2	6	1	4	1	2	2	1	2	1	1	1	1	1	2	2	2
0	0	1	0			2	6	1	4	1	1	1	2	2	2	1	2	1	2	1	2	2
0	0	1	0			2	8	1	2	2	1	1	2	1	1	2	1	1	2	2	2	2
				7	1	2	6	1	4	2	1	2	2	2	2	1	1	1	2	2	1	2
0	0	1	0			2	7	1	4	2	1	2	2	2	2	1	1	2	2	2	2	2
0	0	1	0			2	7	1	4	2	3	2	1	2	2	2	2	2	2	2	2	2
0	0	1	0			2	6	1	4	1	2	2	2	2	2	1	2	1	2	2	2	2
0	0	1	0			2	7	1	4	2	1	2	1	1	2	2	1	2	2	2	2	2
				7	1	2	9	1	4	2	2	2	1	1	1	1	1	1	1	2	2	2
				7	1	2	6	1	4	1	1	2	2	1	2	2	1	2	2	2	2	2
				7	1	2	4	1	4	2	1	2	1	2	2	2	1	1	2	1	2	1
0	0	1	0			2	6	1	4	1	2	2	2	2	2	1	2	2	2	2	2	1
				7	1	2	6	1	4	1	1	2	2	2	2	2	1	1	2	2	2	2
				7	1	2	8	1	4	1	2	1	1	1	1	2	1	1	2	2	3	1														0	0	0	0	0	0	0	1	1	1	0	0	0
0	0	1	0			2	6	1	4	3	1	2	1	1	2	2	1	1	2	2	2	2
				3	3	2	3	1	4	0	2	1	1	1	1	1	1	1	2	1	2	2
1	0	0	0			2	4	1	4	1	3	1	2	1	1	2	2	2	2	2	2	2
0	0	1	0			2	6	1	4	1	2	2	2	2	2	1	2	2	2	2	2	2
0	0	1	0			2	6	1	4	3	2	2	2	1	2	2	1	1	2	2	2	2
				7	1	2	6	1	4	2	2	2	2	2	2	2	1	2	2	2	2	2
				4	3	2	5	1	4	0	3	2	2	2	2	2	2	1	2	2	2	2
				1	3	2	6	1	4	1	1	1	2	2	2	2	1	2	2	2	2	2
0	0	1	0			2	7	1	4	2	1	2	2	1	2	2	1	2	2	1	1	1
				7	1	2	6	1	4	2	1	2	1	2	2	2	2	1	2	2	2	2
1	0	0	0			2	3	1	4	1	2	1	2	1	1	1	1	1	2	2	2	2
				7	1	2	6	2	4	2	2	2	1	2	2	2	2	1	1	2	2	2
				4	3	2	7	1	4	1	1	2	2	2	2	2	2	2	2	2	1	2
0	0	1	0			2	6	1	4	1	2	1	1	1	1	1	1	1	2	2	2	2
				7	1	2	6	1	4	2	2	2	2	1	1	1	1	1	2	2	2	2
0	0	1	0			2	8	1	4	2	2	2	2	2	1	1	2	1	2	1	3	1														0	0	0	1	0	0	0	0	0	0	0	0	0
0	0	1	0			2	6	1	4	2	1	2	2	2	2	2	2	2	2	2	2	2
				4	3	4	6	1	4	0	1	2	2	2	2	2	2	2	2	2	2	2
				3	3	2	3	1	4	2	2	1	1	1	2	1	1	2	2	2	2	1
0	0	1	0			1	3	1	4	1		2	2	1	1	2	2	2	2	1	3	3														0	0	0	0	0	0	0	0	0	0	0	0	1	0
				7	1	2	2	1	4	1	2	2	2	2	1	2	1	2	2	2	2	2
0	0	1	0			2	4	1	4	2	2	2	1	1	1	1	1	1	2	2	2	2
				7	1	2	6	1	4	3	3	2	2	2	2	2	2	2	2	2	2	2
0	0	1	0			2	6	1	4	1	4	2	1	2	2	2	1	2	2	2	2	2
				7	1	2	6	1	4	1	1	2	1	1	2	2	1	1	2	1	1	2
				7	1	2	7	1	4	1	2	2	1	2	1	2	1	1	2	2	2	1
				7	1	2	8	1	4	1	1	1	1	1	1	2	1	1	2	2	2	1
0	0	1	0			2	6	1	4	1	1	1	1	1	2	2	2	1	2	2	2	2
				7	1	2	3	1	2	3	1	2	2	2	2	2	2	2	2	2	2	2
0	0	1	0			2	6	1	4	2	2	2	2	1	2	2	2	2	2	2	2	2
				7	1	3	6	1	4	2	1	2	2	2	2	2	2	2	2	2	2	2
0	0	1	0			2	4	1	4	1	2	1	2	1	2	1	1	1	1	1	2	2
0	0	1	0			2	6	1	4	1	1	1	2	1	2	2	1	2	1	2	2	2
0	0	1	0			2	5	1	2	1	3	2	1	1	1	1	1	1	2	2	2	2
1	0	0	0			2	6	1	4	1	1	1	1	1	2	2	1	2	2	2	2	2
				7	1	2	3	1	4	2	1	2	2	2	2	2	2	2	2	2	2	2
0	0	1	0			2	4	1	4	2	2	1	1	1	2	2	1	1	2	2	1	1
				7	1	2	4	1	4	2	2	2	1	1	1	2	2	1	1	2	2	2
0	0	1	0			2	6	1	4	1	2	2	2	2	2	2	1	1	2	2	2	2
0	0	1	0			2	3	1	4	2	3	2	2	1	1	2	1	2	2	1	2	1
				3	3	2	6	1	4	0	1	1	1	1	2	2	1	2	2	2	2	2
0	0	1	0			2	6	1	4	2	1	1	2	1	1	2	1	1	2	2	2	1
0	0	1	0			2	5	1	2	2	2	2	2	2	2	2	2	1	2	2	2	2
				7	1	2	6	1	4	1	2	1	2	2	2	2	2	2	2	1	2	2
0	0	1	0			2	6	1	4	2	2	2	1	2	2	2	1	1	2	2	2	2
				7	1	2	6	1	4	1	1	2	1	2	2	2	1	1	2	1	2	2
				7	1	2	5	1	4	1	1	1	1	1	2	2	1	2	2	1	1	2
				2	3	2	3	1	2	1	2	1	2	1	1	1	1	2	2	2	2	2
0	0	1	0			2	2	1	4	2	3	2	2	2	2	2	2	2	2	2	2	2
0	0	1	0			2	3	1	4	1	1	2	1	2	2	2	1	1	2	2	2	2
				7	1	2	9	1	4	3	1	2	1	2	2	2	1	1	2	2	2	2
0	0	1	0			2	6	1	4	1	2	2	2	2	2	2	2	2	2	2	2	2
0	0	1	0			2	6	1	4	2	1	2	2	1	1	2	1	2	2	1	2	1
				7	1	2	5	1	4	2	2	1	1	1	1	1	1	1	2	3	3	3	0	0	0	0	0	0	1	1	0	0	0	0	0	0	0	0	0	0	0	1	1	0	0	0	0	0	0
				7	1	6	4	1	4	3		2	2	2	1	1	1	1	2	2	2	2
0	0	1	0			2	7	1	4	1	2	2	2	2	2	2	2	2	2	1	2	1
0	0	1	0			2	7	1	4	1	1	1	1	1	1	1	1	1	1	1	2	1
0	0	1	0			2	6	1	4	2	2	2	1	2	2	2	1	1	2	2	2	2
0	0	1	0			2	4	1	4	1	2	2	1	1	2	2	1	1	2	2	2	2
				7	1	2	8	1	4	1	1	1	1	2	2	2	1	1	2	2	2	1
				7	1	2	7	1	4	1	1	2	1	1	2	2	1	1	2	1	1	1
0	0	1	0			2	7	1	4	1	1	2	2	2	2	2	2	2	2	2	2	1
				7	2	2	6	1	4	4	1	1	2	1	2	2	2	2	2	2	2	1
0	0	1	0			2	6	1	4	2	2	2	1	1	2	2	1	1	2	1	1	2
0	0	1	0			2	4	1	4	2	4	2	1	2	1	2	1	1	2	2	2	2
				7	1	2	6	1	4	1	1	2	1	2	2	2	1	2	2	2	2	1
				7	1	2	4	1	4	2	2	2	2	2	2	2	2	2	2	2	2	2
				7	1	2	7	1	4	1	1	2	2	2	2	2	2	2	2	2	2	2
0	0	1	0			2	6	1	4	3	2	2	1	1	1	1	1	1	2	3	3	3	0	1	0	0	0	0	0	0	0	0	0	0	0	0	1	0	0	0	0	0	0	0	0	0	0	0	0
				7	1	2	4	1	4	1	1	1	2	2	2	2	2	2	2	2	2	2
0	0	1	0			1	7	1	4	1		2	1	1	2	2	1	2	2	3	3	3	0	0	0	0	1	0	0	0	0	0	0	0	0	0	0	0	1	1	0	0	0	0	0	0	0	0	0
0	0	1	0			2	6	1	4	2	2	2	2	2	2	2	2	2	2	3	2	3	1	1	1	1	1	1	1	1	1	1	1	1	1														1
0	0	1	0			2	3	1	4	2	1	2	2	2	2	1	1	2	2	2	2	2
				3	3	2	4	1	2	0	1	1	2	2	2	2	2	1	1	2	2	2
0	0	1	0			1	6	1	2	1		2	2	2	2	2	2	2	2	1	1	1
1	0	0	0			2	6	1	4	1	1	2	2	2	2	2	2	2	2	2	2	2
				7	1	2	3	1	4	2	2	2	1	2	2	2	2	1	2	2	2	2
				7	1	2	2	1	4	1	3	2	1	1	1	2	2	2	2	2	2	2
				7	1	2	9	1	4	1	1	2	2	1	2	1	1	1	2	2	2	2
1	0	0	0			2	3	1	4	1	1	1	1	1	2	2	1	1	2	2	2	2
0	0	1	0			2	5	1	4	2	2	2	1	2	1	2	1	1	2	2	2	2
0	0	1	0			2	6	1	2	3	1	2	2	2	2	2	2	2	2	2	2	2
				5	3	2	6	1	4	1	1	1	2	2	2	2	1	2	2	1	2	2
0	0	1	0			2	6	1	4	3	1	2	2	2	2	2	2	2	2	3	2	3	1	0	0	0	0	0	0	0	0	0	0	0	0														0
				7	1	2	4	1	4	1	1	1	1	2	2	2	1	2	2	2	2	1
0	0	1	0			2	9	1	4	1	1	1	1	1	1	1	1	1	2	1	1	1
1	0	0	0			2	7	1	4	0	1	1	2	2	1	2	2	1	2	2	2	2
0	0	1	0			2	2	1	4	2	1	2	1	1	2	2	1	1	2	2	2	2
				7	1	2	6	1	4	1	2	2	1	2	2	2	1	2	2	2	2	1
				7	1	2	7	1	4	1	1	1	1	2	1	2	2	1	2	2	2	2
1	0	0	0			2	6	1	4	1	1	1	1	1	2	2	1	2	2	1	2	1
				7	1	2	6	1	4	1	2	2	1	1	1	2	2	2	2	1	2	2
1	0	0	0			2	7	1	4	1	2	2	2	2	2	2	1	2	2	2	2	2
				7	1	2	6	1	4	1	1	2	2	2	2	2	1	2	2	2	2	2
0	0	1	0			2	6	1	4	2	2	2	2	1	2	2	2	1	2	2	2	2
				7	1	2	6	1	4	3	1	2	1	1	2	1	1	2	2	2	2	2
0	0	1	0			2	2	1	4	2	3	2	1	1	2	2	2	1	2	2	2	1
				7	1	2	6	1	4	1	1	2	2	2	2	2	2	2	2	2	2	2
1	0	0	0			2	4	1	2	1	1	1	1	1	2	2	1	2	2	2	2	1
				7	1	2	7	1	4	1	1	2	2	1	2	2	1	1	2	2	2	2
				5	3	2	9	1	4	1	1	2	2	2	2	2	2	2	2	2	2	2
				7	1	2	6	1	4	1	2	1	2	2	1	1	1	2	2	1	2	1
				3	3	2	3	1	4	2	1	2	2	2	2	2	2	2	2	2	2	2
				7	1	2	7	1	4	2	1	2	2	2	2	2	2	2	2	2	2	1
				7	1	2	9	1	4	1	1	2	2	2	2	2	2	1	2	2	2	1
0	0	1	0			2	8	1	4	2	1	2	2	2	2	2	2	2	2	2	2	2
				7	1	2	7	1	4	2	1	1	2	2	2	2	1	1	2	2	2	2
0	0	1	0			6	4	1	4	2		2	1	2	2	2	1	2	2	2	2	2
				7	1	2	3	1	4	1	1	2	2	1	1	2	1	2	2	3	3	3	0	1	1	0	0	0	0	0	0	0	0	0	0	0	1	1	0	0	0	0	0	0	0	0	0	0	0
				7	1	2	6	1	4	2	1	2	2	2	2	2	1	1	2	2	1	2
1	0	0	0			2	7	1	4	1	2	1	1	2	2	2	2	2	2	2	2	1
0	0	1	0			2	6	1	2	2	2	2	2	2	2	2	1	2	2	2	2	2
0	0	1	0			2	2	1	4	1	2	2	1	2	1	1	1	1	2	1	3	3														0	0	0	0	0	0	0	0	1	0	0	0	0	0
				7	1	2	7	1	4	2	1	2	2	2	2	2	1	1	1	2	2	2
0	0	1	0			2	6	1	4	1	1	2	2	1	2	2	1	2	2	2	2	2
0	0	1	0			2	5	1	4	2	1	2	2	2	2	2	2	2	2	2	2	2
				5	3	2	7	1	4	0	1	1	1	2	2	2	1	2	2	2	2	2
0	0	1	0			2	5	1	4	2	1	2	2	2	2	2	2	2	1	2	2	1
				7	1	2	6	1	4	3	1	2	2	2	2	2	2	2	2	2	2	2
				7	1	2	9	1	4	2	1	2	2	1	2	2	2	1	2	2	2	1
0	0	1	0			2	6	1	4	3	1	2	2	2	2	2	1	2	2	2	2	2
0	0	1	0			2	6	1	4	1	1	1	2	1	2	2	2	2	2	2	2	2
				7	1	2	6	1	4	1	2	2	2	2	2	2	2	2	2	2	2	1
1	0	0	0			2	6	2	4	0	3	1	1	1	1	1	1	1	1	3	2	1	0	0	0	1	0	0	0	0	1	0	1	0	0
0	0	1	0			2	6	1	4	2	1	2	2	1	2	2	2	2	2	2	2	2
				7	1	2	6	1	2	3	1	2	2	2	2	2	2	2	2	2	2	2
				7	1	2	6	1	4	2	2	2	1	1	2	2	2	2	2	2	2	2
0	0	1	0			2	9	1	4	2	1	2	1	1	2	2	2	2	2	2	2	2
1	0	0	0			2	6	1	4	1	1	1	1	1	2	2	1	1	2	2	2	2
1	0	0	0			2	6	1	2	2	1	1	1	1	2	2	1	1	2	1	3	1														0	0	0	1	0	0	0	0	0	0	0	0	0
				7	2	2	3	1	4	2	1	2	2	2	2	2	2	2	2	2	2	2
				5	3	2	5	1	4	0	2	1	1	1	1	1	1	1	2	1	1	2
0	0	1	0			2	6	1	4	3	1	2	2	2	2	2	1	2	2	2	2	2
				4	3	2	4	1	4	0	2	2	2	2	2	2	2	2	2	2	2	2
				5	3	2	9	1	2	1	2	1	2	2	2	2	2	2	2	2	2	2
				7	1	2	8	2	4	2	2	2	1	2	2	2	1	2	2	2	2	2
				7	1	2	8	1	4	1	1	2	2	2	1	1	1	1	2	1	2	1
				7	1	2	4	1	4	1	2	2	2	2	2	2	1	1	2	1	2	2
				7	1	2	6	1	4	2	1	2	2	2	2	2	2	2	2	1	2	2
0	0	1	0			2	6	1	4	2	1	2	2	2	2	2	2	2	2	1	2	2
1	0	0	0			2	6	1	4	2	1	2	2	2	2	2	2	2	2	2	2	2
				7	1	2	4	1	4	1	3	2	2	1	2	2	1	1	2	2	2	2
				3	3	2	6	1	2	1	2	1	1	1	1	1	1	1	2	2	2	2
				7	1	2	3	1	4	3	1	2	2	2	2	2	2	1	2	2	2	2
				7	1	2	3	1	4	2	1	2	2	2	2	2	2	1	2	2	2	2
0	0	1	0			2	9	1	4	1	2	2	2	2	1	1	2	2	2	2	2	2
				7	1	1	5	1	4	1		2	2	2	2	2	2	2	2	1	1	1
1	0	0	0			2	6	1	4	0	1	1	2	1	2	2	2	1	2	2	2	2
0	0	1	0			2	7	1	4	3	2	2	2	2	2	2	2	2	2	2	2	2
				1	3	2	6	2	4	2	3	2	1	1	2	2	1	1	2	2	2	2
0	0	1	0			2	6	1	4	1	1	1	1	1	2	2	1	1	2	2	2	2
				7	1	2	4	1	4	2	1	1	1	1	2	2	1	2	2	1	2	2
				7	1	2	6	1	4	1	1	1	1	1	2	2	2	1	2	3	1	1	0	0	0	0	0	1	1	0	0	0	0	0	0
				7	1	2	4	1	2	2	1	2	2	2	2	2	2	2	2	2	2	2
0	0	1	0			2	6	1	4	1	2	1	2	2	1	1	1	1	1	1	2	1
				1	3	2	6	1	4	1	3	2	2	2	2	2	2	2	2	2	2	2
				3	3	2	3	1	4	0	1	1	2	2	2	2	2	2	2	2	2	2
				5	3	2	6	1	4	0	1	1	1	1	2	2	1	2	2	1	2	1
				7	1	2	6	1	4	1	1	2	2	2	2	2	2	2	2	2	2	2
0	0	1	0			4	6	1	4	1	4	2	1	2	1	2	2	2	2	1	3	3														0	0	0	0	0	0	0	0	1	0	0	0	0	0
1	0	0	0			2	6	1	4	1	4	1	1	2	1	2	1	2	2	2	2	2
0	0	1	0			2	5	1	4	2	3	1	1	1	1	1	1	1	2	2	1	2
1	0	0	0			2	6	1	4	0	1	1	1	1	2	1	1	1	2	2	2	2
				7	1	2	5	1	2	1	1	2	1	1	2	2	1	1	2	2	2	3																											1
0	0	1	0			2	7	1	4	2	1	2	2	2	2	2	2	2	2	3	3	3	0	1	0	0	0	1	0	0	0	0	0	0	0	0	1	0	0	0	1	0	0	0	0	0	0	0	0
0	0	1	0			2	6	1	2	2	1	2	2	2	2	2	1	1	2	1	3	3														0	1	1	0	0	0	0	0	1	0	0	0	0	0
0	0	1	0			2	8	1	4	2	1	2	2	2	2	2	1	1	2	2	2	2
0	0	1	0			2	5	1	4	2	1	2	2	2	2	2	2	2	2	2	2	1
				7	1	2	5	1	4	2	2	2	2	2	2	2	1	2	2	3	3	3	0	0	1	0	0	0	0	0	0	0	0	0	0	0	0	1	0	0	0	0	0	0	0	0	0	0	0
				7	1	2	8	1	4	1	1	2	1	2	1	2	2	1	2	2	2	2
				5	3	2	4	1	2	0	1	2	2	2	2	2	2	2	2	2	2	2
0	0	1	0			2	9	1	4	1	1	1	2	1	2	2	1	1	2	2	1	2
0	0	1	0			2	6	1	2	1	1	2	2	2	2	2	1	1	2	1	3	1														1	0	1	0	0	0	0	0	0	0	0	0	0
0	0	1	0			2	9	1	4	2	2	2	2	2	2	2	1	2	2	2	2	2
				7	1	2	8	1	4	2	1	2	2	2	2	2	1	1	2	2	2	1
0	0	1	0			2	4	1	4	1	2	2	2	2	2	2	1	1	2	2	2	2
0	0	1	0			2	6	1	4	2	1	2	2	1	2	2	1	2	2	1	2	1
				3	3	2	6	1	4	0	1	1	2	2	2	2	1	1	2	2	2	2
				5	3	2	6	1	4	0	1	1	1	1	2	2	1	1	2	2	2	2
				3	3	2	6	1	2	0	1	1	2	2	2	2	2	2	2	2	2	1
				7	1	2	4	1	2	2	3	1	1	2	2	2	1	2	2	2	2	2
				7	1	2	6	1	4	1	3	2	2	2	2	2	2	1	2	2	2	2
0	0	1	0			2	7	1	4	4	2	2	1	1	1	2	2	2	2	3	3	3	0	0	0	0	0	0	0	0	0	0	0	0	0	0	0	0	0	0	0	0	0	0	0	0	0	0	0
0	0	1	0			2	5	1	4	1	1	2	2	1	2	2	1	1	2	1	2	2
				2	3	2	6	1	4	3	1	2	2	2	2	2	1	2	2	2	2	2
				7	1	2	6	1	4	2	1	2	2	2	2	2	2	2	2	2	1	1
0	0	1	0			2	6	1	4	1	1	2	2	2	2	2	2	1	2	2	2	2
				7	1	2	5	1	4	2	3	1	1	1	1	1	1	1	1	1	2	2
				7	1	2	6	1	4	2	1	2	2	2	2	2	1	1	2	2	2	2
0	0	1	0			2	6	1	4	1	1	2	2	2	2	2	2	2	2	2	2	2
0	0	1	0			2	9	1	4	1	2	2	1	1	1	2	1	1	2	3	3	3	0	0	0	0	0	0	0	0	0	0	0	0	0	0	0	0	0	0	0	0	0	0	0	0	0	0	0
0	0	1	0			2	7	1	4	2	2	2	2	2	1	2	2	1	2	2	2	2
0	0	1	0			2	6	1	4	1	2	2	2	2	1	1	1	2	2	2	1	1
				7	1	2	6	1	4	1	1	2	1	2	2	2	1	1	2	1	2	2
				7	1	2	6	1	4	2	1	2	2	2	2	2	2	2	2	2	2	2
				7	1	2	6	1	2	1	1	1	1	2	1	1	1	1	2	2	2	2
				7	1	2	6	1	4	3	2	2	2	2	1	1	1	2	2	2	3	2														1	1	0	0	0	0	0	0	0	0	0	0	0
0	0	1	0			2	5	1	4	1	1	2	1	1	2	2	1	1	2	2	2	2
0	0	1	0			2	6	1	4	4	1	2	2	1	2	2	2	2	2	2	2	2
				7	1	2	8	2	4	3	2	2	1	1	1	1	1	1	2	1	2	1
0	0	1	0			2	7	1	4	1	1	2	2	2	2	2	2	2	2	2	2	2
				7	1	2	3	1	4	1	1	2	1	1	2	2	1	1	2	2	2	2
				4	3	2	4	1	4	0	1	2	1	2	2	2	2	2	2	2	2	2
0	0	1	0			2	4	1	4	1	1	2	2	2	2	2	2	2	2	2	2	2
1	0	0	0			2	6	1	2	0	1	1	1	1	2	2	1	1	2	2	2	1
0	0	1	0			2	6	1	4	1	1	2	1	2	2	2	2	2	1	2	2	2
0	0	1	0			2	4	1	4	2	1	2	2	2	2	2	2	2	1	2	2	2
0	0	1	0			2	6	1	4	2	1	2	1	1	2	2	1	1	2	2	2	1
1	0	0	0			6	5	1	4	2		1	1	2	2	2	1	1	2	1	1	2
0	0	1	0			2	5	1	4	2	2	2	2	1	1	1	1	1	2	1	2	2
				4	3	2	6	1	4	1	1	1	1	2	2	2	1	2	2	2	2	2
0	0	1	0			2	6	1	4	3	1	2	2	1	2	2	1	1	2	2	2	2
1	0	0	0			2	7	1	4	1	2	1	2	2	2	2	1	2	2	2	2	2
				7	1	1	9	1	4	1		2	2	2	2	2	2	1	2	2	2	2
0	0	1	0			2	4	1	4	2	2	2	2	2	2	2	2	2	2	2	2	2
1	0	0	0			2	8	1	4	1	1	1	1	1	2	2	1	1	2	2	2	2
0	0	1	0			2	4	1	4	2	1	2	2	2	2	2	2	2	2	2	2	2
				7	1	2	9	1	4	1	1	2	2	1	2	2	1	1	2	2	2	2
0	0	1	0			2	6	1	2	1	1	1	1	1	1	1	1	1	1	2	1	2
				3	3	2	7	1	4	0	1	1	1	1	2	2	1	1	2	3	2	2	0	1	0	0	0	0	1	0	1	0	0	0	0
				7	1	2	2	1	4	2	1	1	1	1	1	2	1	2	1	1	2	1
0	0	1	0			2	9	1	4	2	2	2	2	2	2	2	2	2	2	2	2	2
0	0	1	0			2	7	1	4	1	1	1	1	1	2	1	1	1	2	3	3	2	0	0	0	0	0	1	0	0	0	0	0	0	0	0	0	0	0	0	1	0	0	0	0	0	0	0
				5	3	2	6	1	4	0	1	2	1	2	2	2	2	1	2	2	2	1
0	0	1	0			2	5	1	4	2	1	2	2	2	2	2	2	2	2	2	2	2
0	0	1	0			2	6	1	4	1	1	2	2	2	2	2	2	2	2	2	2	2
				7	1	2	6	1	4	1	1	2	1	1	2	2	1	2	2	2	2	1
0	0	1	0			2	7	1	4	3	1	2	2	2	2	1	2	2	2	2	2	2
0	0	1	0			2	6	1	4	3	1	2	2	2	2	2	2	2	2	2	1	1
				7	1	2	6	1	4	2	2	2	2	1	2	2	1	1	2	1	2	1
				7	2	2	4	1	4	2	1	2	1	1	2	1	1	1	1	2	2	1
				7	1	2	8	1	4	2	2	2	1	2	2	2	1	2	2	2	2	2
				7	1	2	9	1	2	1	3	2	2	2	1	2	1	2	2	1	1	2
0	0	1	0			2	4	1	4	1	1	2	2	2	2	2	2	2	2	2	2	1
1	0	0	0			2	6	1	4	1	1	2	2	2	2	2	2	2	2	2	2	2
0	0	1	0			2	4	1	4	1	1	2	1	1	2	1	1	1	1	2	2	1
0	0	1	0			2	6	1	4	1	1	1	2	2	2	2	1	1	2	1	2	1
				7	1	2	5	1	4	2	1	2	2	2	2	2	2	2	2	2	2	2
				7	1	2	7	1	4	1	1	1	2	2	2	2	2	2	2	2	2	2
				5	3	2	7	1	4	0	1	1	2	1	2	2	1	2	2	2	2	1
				7	1	2	5	1	4	3	1	2	2	2	2	1	1	1	2	2	1	2
0	0	1	0			2	5	1	4	4	1	2	2	1	2	2	2	1	2	2	2	2
				2	3	2	6	1	4	1	1	1	1	2	2	1	1	2	2	2	2	2
1	0	0	0			2	7	1	4	4	1	2	1	1	2	2	1	1	1	2	2	1
				7	1	2	1	1	4	4	1	1	1	2	2	2	1	2	2	2	2	2
				7	1	2	8	1	4	2	1	2	1	2	2	1	2	2	2	2	2	2
0	0	1	0			2	7	1	4	1	3	2	2	2	1	1	1	2	2	2	2	2
0	0	1	0			2	9	1	4	1	1	2	2	2	2	2	2	1	2	2	2	2
				7	1	4	4	1	2	1	4	2	2	2	1	2	2	1	2	1	2	1
				7	1	2	6	1	4	2	1	2	2	2	2	2	1	2	2	2	2	1
0	0	1	0			2	6	1	4	1	2	1	1	1	2	2	1	1	2	2	1	1
0	0	1	0			2	6	1	4	1	1	2	2	2	2	2	2	2	2	2	2	2
				7	1	2	2	1	4	1	1	1	2	2	2	2	1	2	2	2	2	2
				7	1	2	7	1	4	1	3	1	1	2	2	2	1	1	2	3	3	3	0	0	0	0	0	0	0	0	0	0	0	0	0	0	0	0	0	0	0	0	0	0	0	0	0	0	0
				7	1	2	7	1	4	1	1	2	2	2	2	2	1	2	2	2	2	2
0	0	1	0			2	6	1	4	1	2	2	1	2	2	2	2	2	2	2	2	2
0	0	1	0			3	5	1	4	2	2	2	2	2	2	2	2	2	2	2	2	2
				7	1	2	6	1	4	1	1	1	1	1	2	2	1	1	2	2	1	2
				5	3	2	4	1	4	0	1	1	1	2	1	2	1	1	2	2	2	1
1	0	0	0			2	6	1	4	2	1	2	1	2	2	1	1	1	2	1	2	1
0	0	1	0			2	6	1	4	1	2	2	2	1	1	2	1	1	2	2	1	2
0	0	1	0			2	3	1	4	2	1	2	2	2	2	2	2	2	2	2	2	2
				7	1	2	6	1	4	3	2	2	2	1	1	2	1	1	2	2	2	2
0	0	1	0			2	5	1	4	2	1	2	2	2	2	2	2	2	2	2	2	2
				7	1	2	6	1	4	2	2	2	2	2	2	2	1	2	2	1	2	2
				4	3	2	6	1	4	1	2	1	1	1	1	1	1	2	2	2	2	2
				7	1	2	4	1	4	3	1	2	1	2	2	2	2	2	2	2	2	2
0	0	0	1			2	7	1	4	2	1	2	2	2	2	2	1	2	2	2	2	2
				5	3	2	9	1	4	0	2	2	2	2	2	2	2	1	2	1	2	2
				7	1	2	10	1	4	2	1	2	1	1	1	1	1	1	1	1	1	2
0	0	1	0			3	6	1	2	1	2	2	1	1	2	1	1	1	1	2	2	2
0	0	1	0			2	5	1	4	3	1	2	1	1	2	2	1	1	1	1	1	1
				7	1	2	4	1	4	1	1	1	2	1	1	1	2	1	1	2	2	1
				7	1	2	4	1	4	1	2	1	1	2	1	2	1	1	2	3	3	3	0	0	0	1	0	0	0	0	0	0	0	0	0	0	0	0	1	0	0	0	0	0	0	0	0	0	0
0	0	1	0			2	3	1	4	2	2	2	1	1	2	2	1	1	2	1	1	2
0	0	1	0			2	6	1	4	2	1	2	2	2	2	2	2	2	2	2	2	1
				1	3	2	3	1	2	3	2	1	1	2	2	1	1	2	2	2	2	2
0	0	1	0			2	6	1	4	3	2	2	2	1	2	1	1	2	2	2	2	2
				3	3	2	6	1	4	0	2	1	1	1	2	2	1	1	2	2	2	1
				7	1	2	4	1	4	3	1	2	1	2	1	2	1	1	2	2	2	2
0	0	1	0			2	5	1	2	2	1	2	1	1	1	1	1	1	2	2	2	2
				5	3	2	4	1	4	0	1	2	2	2	2	2	1	2	2	1	2	2
				7	1	2	6	1	4	2	1	2	2	2	2	2	1	1	2	2	2	2
				7	1	2	8	1	4	1	2	2	2	2	2	2	1	2	2	2	3	2														0	0	0	0	0	0	1	0	0	0	0	0	0
				7	1	2	6	1	4	2	1	1	2	2	2	1	1	1	2	2	2	2
1	0	0	0			2	6	1	4	1	1	2	2	1	2	2	2	1	2	2	2	2
				7	1	2	1	1	2	2	2	2	1	2	2	2	2	2	2	2	2	2
				7	1	2	6	1	4	1	2	2	1	1	1	2	1	1	2	1	1	1
				7	1	2	7	1	4	2	1	1	1	2	1	2	2	1	2	2	2	2
				7	1	2	6	1	4	1	1	2	1	1	2	2	1	1	2	2	2	2
				7	1	2	9	1	4	3	2	1	1	2	1	2	1	1	2	2	2	1
0	0	1	0			2	5	1	4	1	1	2	2	2	2	2	1	1	2	1	1	2
				3	3	2	9	1	4	0	1	2	2	2	2	1	1	2	2	1	2	1
				4	3	2	7	1	4	0	2	2	2	2	2	2	2	2	2	2	2	2
0	0	1	0			2	6	1	4	3	1	2	1	1	2	2	1	2	2	1	2	1
0	0	1	0			2	7	1	4	3	1	2	2	2	2	2	2	2	2	2	2	2
				7	1	2	3	1	4	1	1	2	1	1	2	2	1	1	2	1	2	1
0	0	1	0			2	5	1	4	1	1	2	1	1	2	2	1	1	2	1	2	1
0	0	1	0			2	3	1	4	3	2	2	1	2	2	2	2	1	2	2	2	2
				7	1	2	7	1	4	1	1	1	2	1	2	2	1	2	2	2	2	1
1	0	0	0			2	5	1	4	0	1	1	1	1	1	1	1	1	1	2	2	1
				7	1	2	6	1	4	2	1	2	2	2	2	2	2	1	2	2	2	2
0	0	1	0			2	3	1	4	3	1	2	1	2	1	2	2	2	2	1	2	1
				7	1	2	4	1	2	2	3	2	2	2	1	2	2	2	2	2	2	2
				7	1	2	6	1	4	2	1	2	1	2	2	2	2	2	2	2	2	2
				5	3	2	8	1	4	0	1	1	2	2	2	2	2	2	2	2	2	2
0	0	1	0			2	9	1	4	1	1	2	2	2	2	2	2	2	2	1	2	1
				7	1	2	5	1	4	2	1	2	1	2	1	2	2	2	2	2	2	2
				7	2	2	9	1	4	2	4	1	1	1	1	1	2	1	1	3	3	3	0	0	0	0	0	0	0	0	0	0	0	1	0	0	0	0	0	1	1	0	0	0	0	1	1	0	0
				1	3	2	5	1	4	0	1	1	1	1	2	1	1	1	2	2	2	2
				1	3	4	6	1	4	1	3	2	1	1	1	1	1	1	2	2	2	2
				1	3	2	5	1	2	1	1	1	2	1	2	2	1	1	2	2	2	2
				4	3	2	8	1	4	0	1	1	2	2	2	2	2	2	2	2	2	2
				7	1	2	3	1	2	2	1	2	2	2	2	2	2	2	2	2	2	2
				7	1	2	5	1	4	4	1	2	2	2	2	2	2	2	2	3	3	3	0	0	0	0	0	0	0	1	0	0	0	0	0	0	0	0	0	0	0	0	1	0	0	0	0	0	0
				5	3	2	6	1	4	0	1	1	1	1	2	2	1	1	2	2	2	1
				3	3	2	6	1	2	1	1	1	1	1	2	2	1	1	2	2	2	2
				7	1	2	3	1	2	2	1	2	2	2	2	2	2	1	2	2	2	2
0	0	1	0			2	3	1	2	2	2	2	1	2	1	2	2	2	2	2	2	2
0	0	1	0			3	9	1	4	2	3	2	2	2	2	2	1	1	2	2	2	2
				7	1	2	6	1	4	2	1	2	2	2	2	2	1	1	2	2	2	1
0	0	1	0			2	6	1	4	2	2	2	2	2	2	2	2	1	2	2	2	2
				5	3	2	5	1	4	0	1	1	2	1	2	2	1	2	2	2	2	1
				2	3	2	6	1	4	0	2	1	1	2	2	1	1	2	2	1	2	2
				7	1	2	6	1	4	1	1	2	2	2	2	2	2	2	2	2	2	2
1	0	0	0			2	6	1	4	3	2	1	1	1	2	1	1	2	2	2	2	2
				7	1	2	6	1	4	2	2	2	1	1	2	1	1	2	2	2	2	2
0	0	1	0			2	3	1	4	1	1	1	2	1	2	2	1	2	2	2	2	2
0	0	1	0			2	5	1	4	2	1	2	2	2	2	2	2	2	2	2	2	2
				7	1	2	4	1	4	2	1	2	2	2	2	2	2	1	2	2	2	2
0	0	1	0			2	3	1	4	2	2	2	1	2	1	2	1	1	2	3	3	3	0	1	0	1	0	0	0	0	0	0	0	0	1	0	1	0	1	0	0	0	0	1	0	0	0	0	0
				7	1	2	6	1	4	1	1	2	1	2	1	2	1	2	2	2	2	1
				7	1	2	4	1	4	1	1	2	2	2	2	2	2	2	2	2	2	1
0	0	1	0			2	8	1	4	3	2	2	2	1	2	2	1	2	2	2	2	2
				7	1	2	7	1	4	2	1	2	2	2	1	2	1	1	2	3	2	2	0	0	0	1	0	0	0	0	1	0	0	0	0
0	0	1	0			2	6	1	4	1	1	2	2	1	1	1	1	1	1	2	2	2
0	0	1	0			2	6	1	2	1	1	1	1	1	2	2	1	1	2	1	2	1
0	0	1	0			2	6	1	4	2	1	2	2	2	2	2	2	2	2	3	3	3	0	0	0	0	0	0	0	0	0	0	0	0	0	0	0	0	0	0	0	0	0	0	0	0	0	0	0
				7	1	2	6	1	2	1	1	2	2	2	2	2	2	1	2	2	2	2
0	0	1	0			2	6	1	4	3	1	2	2	1	2	2	1	2	2	2	2	2
				7	1	2	6	1	4	1	2	2	1	1	2	2	1	1	2	2	1	1
0	0	1	0			2	7	1	4	2	2	2	2	2	2	2	1	2	2	2	2	2
				7	1	2	6	1	4	1	2	1	1	1	1	1	1	1	2	3	1	1	0	0	1	0	0	0	0	0	0	0	0	0	0
0	0	1	0			2	6	1	4	2	1	2	2	1	2	2	1	1	2	2	1	1
				7	1	2	6	1	4	1	1	2	2	2	2	2	2	2	2	3	3	3	0	0	0	0	0	1	0	0	0	0	0	0	0	0	0	0	0	0	1	0	0	0	0	0	0	0	0
0	0	1	0			2	4	1	4	1	1	2	1	2	2	1	2	2	2	2	2	2
				7	1	2	4	1	4	2	1	2	2	2	2	2	1	2	2	2	2	1
0	0	1	0			4	6	1	4	1	2	2	1	1	2	1	1	1	2	2	2	1
				7	1	2	6	1	4	1	1	2	2	1	2	2	1	1	2	2	2	1
0	0	1	0			2	4	1	4	3	1	2	2	1	2	2	2	2	2	2	2	2
				3	3	2	3	1	4	3	2	2	1	1	1	2	1	2	1	1	2	1
				7	1	2	2	1	4	1	1	1	2	1	2	2	2	2	2	2	2	2
				5	3	2	4	1	4	1	1	1	1	1	2	2	1	2	2	2	2	1
1	0	0	0			2	6	1	4	2	1	2	2	2	2	2	2	2	2	2	2	2
0	0	1	0			2	2	1	2	2	1	2	2	2	2	2	2	2	2	2	1	1
0	0	1	0			2	5	1	4	1	1	2	2	2	2	2	2	2	2	2	2	2
0	0	1	0			2	7	1	4	1	1	2	1	2	2	2	2	2	2	2	2	2
				5	3	6	4	1	4	0		2	2	2	2	2	2	2	2	3	3	2	0	0	0	0	0	0	0	0	0	0	0	0	0	0	0	0	0	0	0	0	0	0	0	0	0	0
0	0	1	0			2	5	1	4	3	1	2	1	1	2	1	1	1	2	2	2	2
0	0	1	0			2	6	1	4	2	3	2	1	1	1	1	1	1	2	2	2	2
				7	1	2	9	1	4	2	1	2	2	1	2	2	2	1	2	2	2	1
0	0	1	0			2	3	1	4	2	1	2	2	2	2	2	2	2	2	2	2	2
				7	1	2	6	1	4	1	1	1	2	1	1	2	1	1	2	2	1	2
0	0	1	0			2	6	1	2	1	2	2	1	1	2	2	1	2	2	2	2	1
				7	2	2	8	1	4	2	1	1	1	1	1	2	1	1	2	2	2	2
0	0	1	0			2	4	1	4	2	1	2	2	1	2	2	2	1	1	2	2	2
0	0	1	0			2	6	1	4	1	1	2	2	2	2	2	2	2	2	2	1	1
0	0	1	0			2	5	1	4	3	1	2	1	1	2	1	1	2	1	2	2	2
0	0	1	0			2	9	1	2	2	1	2	2	2	2	2	2	2	2	2	2	2
				7	1	2	4	1	4	2	1	2	1	2	2	2	1	1	2	2	2	2
0	0	1	0			2	6	1	4	2	2	2	1	1	1	1	1	1	1	2	2	1
0	0	1	0			2	6	1	4	2	1	2	1	2	2	2	1	2	2	2	2	2
				7	1	2	6	1	4	2	1	2	1	2	2	2	2	2	2	2	2	1
				2	3	2	6	1	4	1	2	2	2	2	2	2	2	2	2	2	2	2
0	0	1	0			2	7	1	4	2	2	2	2	2	2	2	2	2	2	2	2	2
				7	1	2	7	1	4	2	1	2	2	2	2	2	1	2	2	2	2	2
				7	1	2	6	1	2	2	1	2	2	2	2	2	2	2	2	3	3	1	0	0	0	0	0	0	0	0	0	0	0	0	0	0	0	0	0	0	0	0	0	0	0	0	0	0
0	0	1	0			2	3	1	4	3	1	1	1	1	2	1	1	1	1	2	1	2
				7	1	2	4	1	4	2	1	2	2	1	2	2	2	2	2	2	2	1
0	0	1	0			2	4	1	4	1	1	2	1	1	2	1	1	2	2	2	2	2
0	0	1	0			2	6	1	4	2	1	2	1	1	1	1	1	1	2	2	1	2
0	0	1	0			2	8	1	2	1	1	2	1	2	2	2	2	1	2	1	2	2
				7	1	2	8	1	4	2	2	2	2	2	2	2	1	2	2	1	2	1
				3	3	2	6	1	4	2	1	1	2	2	2	1	1	1	2	2	2	1
				5	3	2	3	1	4	0	1	1	1	1	2	2	2	2	2	2	2	2
0	0	1	0			2	4	1	4	2	4	2	1	2	1	1	1	1	2	1	1	2
				3	3	2	6	1	2	0	2	2	2	2	2	2	2	2	2	2	2	2
0	0	1	0			2	6	1	4	1	2	2	2	2	2	2	1	2	2	2	2	2
				1	3	2	6	1	4	0	1	1	2	1	2	2	1	1	2	1	2	1
				7	1	2	6	1	4	3	1	2	2	1	2	2	1	1	2	2	2	1
				3	3	2	7	1	4	0	1	1	1	1	1	2	1	2	2	2	2	3																											0
				7	1	2	7	1	2	1	1	1	2	2	1	2	1	1	2	2	2	1
1	0	0	0			2	6	1	4	1	1	1	2	1	1	2	1	1	2	2	2	2
				3	3	2	3	1	4	0	2	1	1	1	2	2	1	1	2	3	2	2	0	1	0	1	1	0	0	0	0	0	0	0	0
0	0	1	0			2	4	1	4	1	1	2	2	2	2	2	2	2	2	2	2	1
				7	1	2	3	1	4	2	2	2	1	2	2	2	2	1	2	2	2	2
0	0	1	0			2	7	1	4	1	1	2	2	2	2	2	2	2	2	1	1	3																											0
0	0	1	0			2	6	1	4	3	2	2	2	2	2	2	2	1	2	2	2	1
0	0	1	0			2	9	1	4	2	1	2	2	2	2	1	2	1	1	2	2	2
				7	1	2	7	1	4	1	1	1	2	2	2	2	2	2	2	2	2	2
				4	3	2	6	1	4	0	1	1	1	2	2	2	1	1	2	2	2	2
0	0	1	0			2	8	1	4	1	1	2	2	2	2	2	2	1	2	1	2	2
0	0	1	0			2	4	1	4	2	1	2	2	2	2	2	2	2	2	2	2	3																											1
				7	1	2	7	1	4	2	1	2	2	2	2	2	1	2	2	2	2	2
				7	1	2	6	1	4	1	1	2	2	2	2	2	2	2	2	2	2	2
0	0	1	0			2	6	1	4	1	1	2	1	2	2	2	1	1	2	2	2	2
0	0	1	0			3	4	1	4	1	1	2	1	2	2	2	2	1	2	2	2	2
				4	3	2	6	1	4	1	1	1	2	2	2	2	2	2	2	2	2	1
0	0	1	0			2	9	1	4	2	2	2	2	2	1	2	2	1	2	2	2	2
0	0	1	0			2	6	1	4	1	3	2	1	2	2	2	1	1	2	1	2	1
0	0	1	0			2	4	1	4	2	2	2	1	1	2	1	1	1	2	3	2	2	0	1	1	1	1	0	0	0	1	0	0	0	0
0	0	1	0			2	6	1	4	2	1	2	2	2	2	2	2	2	2	2	2	2
				3	3	2	7	1	4	1	2	1	2	1	2	2	1	2	2	2	2	1
				7	1	2	6	1	4	1	1	2	1	2	2	2	1	2	2	2	2	2
0	0	1	0			2	6	1	4	2	1	1	1	1	1	1	1	1	2	2	2	2
				7	1	2	3	1	2	1	2	2	1	1	2	2	1	1	2	2	2	2
				7	1	2	6	1	4	1	2	1	1	2	2	2	2	1	2	2	2	1
0	0	1	0			2	6	1	4	2	1	2	2	2	2	2	2	2	2	2	2	2
				5	3	2	2	1	4	2	2	1	1	1	2	1	1	1	1	2	2	2
1	0	0	0			2	6	1	4	1	1	2	2	2	2	2	2	2	2	2	2	2
0	0	1	0			2	2	2	2	1	1	2	2	2	2	2	2	2	2	2	2	2
				7	1	2	4	1	4	3	1	2	1	1	2	2	2	1	2	1	2	2
0	0	1	0			2	2	1	4	5	2	2	1	2	2	2	2	2	2	2	2	2
				7	1	2	7	1	4	3	1	2	1	1	2	2	1	1	2	2	2	2
				7	1	2	7	1	2	1	1	2	1	2	2	2	2	1	2	1	1	1
				7	1	2	6	1	4	4	1	2	1	2	2	2	1	1	2	2	1	1
0	0	1	0			2	4	1	4	1	2	2	1	1	2	2	2	1	2	1	2	1
				7	1	2	4	1	4	2	1	2	2	2	2	2	2	2	2	2	1	1
				7	1	2	6	1	4	1	1	2	2	2	2	2	2	2	2	2	2	1
0	0	1	0			2	5	1	4	1	1	1	1	1	2	2	1	1	2	2	2	2
				7	1	2	5	1	4	3	1	2	2	2	2	2	2	2	2	2	2	2
				1	3	2	6	1	4	1	1	1	1	1	2	2	1	1	2	2	2	2
0	0	1	0			2	4	1	4	2	1	2	2	2	2	2	2	1	2	2	2	2
				7	2	2	4	1	4	2	2	2	1	2	2	2	1	1	2	2	2	2
				7	1	3	6	1	4	1	2	2	1	1	1	1	1	1	2	2	2	2
0	0	1	0			2	6	1	4	1	1	2	2	2	2	2	2	2	2	2	2	2
				7	1	2	4	1	4	2	1	2	1	1	2	2	1	1	1	2	2	2
1	0	0	0			2	6	1	4	0	2	1	1	2	1	2	2	2	2	2	2	2
0	0	1	0			2	3	1	4	3	1	2	2	2	2	2	2	1	2	1	2	2
				3	3	2	5	1	4	1	1	1	2	1	2	2	2	2	1	2	2	2
				2	3	2	5	1	4	1	1	1	2	1	2	2	1	2	2	2	1	1
				7	1	3	8	1	4	3	1	2	2	2	2	2	2	2	2	2	2	2
				7	2	2	6	1	4	1	1	2	1	1	2	2	1	1	2	2	1	1
0	0	1	0			2	3	2	4	2	2	2	2	2	2	2	2	2	2	2	2	2
0	0	1	0			2	3	1	4	2	1	2	2	2	2	2	1	2	2	2	2	2
0	0	1	0			2	2	1	4	3	1	2	1	1	1	2	2	2	2	2	2	2
1	0	0	0			2	4	1	2	1	2	1	1	1	1	2	1	1	2	1	2	2
1	0	0	0			2	6	1	4	1	1	1	2	2	2	2	1	2	2	2	2	1
0	0	1	0			2	5	1	4	1	3	2	2	2	2	2	2	2	2	2	2	2
0	0	1	0			2	8	1	4	3	2	2	2	2	2	2	2	2	2	2	2	2
				7	1	2	8	1	4	1	1	2	1	1	1	2	1	2	2	1	2	1
0	0	1	0			2	9	1	4	1	1	2	2	1	2	2	1	2	2	2	2	2
				7	1	2	7	1	4	2	2	2	1	2	2	1	1	1	2	2	2	2
0	0	1	0			2	4	2	4	1	1	2	2	2	2	2	1	1	1	2	2	1
0	0	1	0			2	5	1	4	1	1	2	2	2	2	2	2	1	2	2	2	2
				7	1	2	7	1	4	1	1	2	2	2	2	2	2	2	2	2	2	2
				7	1	2	7	1	4	1	1	2	2	2	2	2	1	2	2	2	2	2
				3	3	2	6	1	2	0	2	1	1	1	2	2	1	1	2	2	2	2
0	0	1	0			2	6	1	4	2	1	2	2	2	2	2	1	2	2	2	2	2
				5	3	2	7	1	4	1	2	1	2	1	1	1	1	1	2	2	2	1
				7	1	2	6	1	4	2	1	2	2	2	2	2	1	2	2	2	1	2
				7	1	2	3	1	4	3	1	2	1	2	2	2	2	1	2	2	2	2
				2	3	2	3	1	4	0	2	2	2	2	2	2	2	2	2	1	2	1
				4	3	3	6	1	4	2	1	2	2	2	2	2	2	2	2	2	2	2
				7	1	2	7	1	4	2	1	2	2	2	2	2	1	1	2	1	1	2
0	0	1	0			2	6	1	2	2	2	2	2	2	2	2	1	1	2	2	2	2
				2	3	2	8	1	4	1	2	1	2	2	2	2	1	2	2	2	2	2
1	0	0	0			2	5	1	4	2	1	2	2	2	2	2	2	2	2	2	2	2
				4	3	2	8	2	2	0	1	1	1	2	1	1	1	2	1	2	2	2
				7	1	2	6	1	4	1	2	2	2	1	1	1	1	2	1	2	2	2
0	0	1	0			2	7	1	4	3	1	2	1	2	2	2	1	1	2	2	1	2
1	0	0	0			2	7	1	4	0	1	2	2	2	2	2	2	2	2	1	2	1
0	0	1	0			2	6	1	4	2	2	2	2	2	2	1	2	2	2	1	2	2
				7	1	2	4	1	4	1	1	2	2	2	2	2	2	2	2	2	2	2
0	0	1	0			2	6	1	4	2	1	2	2	2	2	2	2	1	2	2	2	2
0	0	0	1			2	6	1	4	3	3	2	2	2	2	2	2	2	2	3	3	2	1	0	0	0	0	0	0	0	0	0	0	0	0	1	0	0	0	0	0	0	0	0	0	0	0	0
				7	1	2	3	1	4	2	2	2	1	1	2	2	2	1	1	2	2	1
				7	1	2	3	1	4	3	2	2	2	2	2	2	1	2	2	2	2	2
0	0	1	0			6	3	1	4	2		2	1	2	2	2	1	2	2	1	1	3																											0
				7	1	2	4	1	4	1	1	2	2	1	2	2	1	1	2	2	2	2
0	0	1	0			2	4	1	4	1	3	1	1	1	1	1	1	1	1	2	2	2
0	0	1	0			6	6	1	2	3		2	1	2	2	2	1	1	2	2	2	2
0	0	1	0			2	4	1	2	1	1	2	1	2	2	2	2	1	2	3	3	3	0	0	0	0	0	1	0	0	0	0	0	0	0	0	0	0	0	0	1	0	0	0	0	0	0	0	0
				3	3	2	7	1	4	0	2	1	1	2	2	2	1	2	2	2	2	2
				5	3	1	6	1	4	0		1	1	1	1	1	2	1	2	2	2	2
				7	1	2	6	1	4	2	1	2	2	1	2	2	2	1	2	2	2	2
				3	3	2	6	1	4	1	1	1	2	2	2	2	1	2	2	2	2	2
0	0	1	0			2	6	1	4	1	1	2	1	1	2	2	1	1	2	2	2	1
0	0	1	0			2	3	1	4	2	3	2	1	1	1	1	1	2	2	2	1	2
				7	1	1	8	1	4	1		2	1	2	1	2	2	1	2	2	2	1
0	0	1	0			2	5	1	4	4	1	2	1	2	1	2	1	1	2	2	2	2
				7	1	2	4	2	4	2	1	2	1	2	2	2	2	2	2	1	1	1
0	0	1	0			2	4	1	2	2	2	2	1	1	1	1	1	2	2	2	2	2
				5	3	2	6	1	2	0	1	1	2	1	2	2	1	2	2	1	2	1
0	0	1	0			2	6	1	4	2	1	2	2	2	2	2	2	2	2	2	2	2
				7	1	2	6	1	4	1	1	1	1	1	1	1	1	1	2	2	2	2
0	0	0	1			2	4	1	4	2	3	1	1	2	2	2	1	1	1	3	2	2	0	0	0	0	1	0	1	0	1	0	0	0	0
				7	1	2	6	1	4	1	2	1	1	1	2	1	2	1	2	2	2	2
				3	3	2	1	1	2	0	1	2	1	1	2	1	1	2	2	1	3	1														0	1	1	0	0	0	0	0	0	0	0	0	0
1	0	0	0			2	7	1	4	1	2	2	1	1	1	1	1	1	1	2	2	2
0	0	1	0			2	3	1	4	1	2	1	1	1	1	1	2	1	1	1	2	2
1	0	0	0			2	5	1	4	1	4	2	1	1	1	1	2	1	2	2	2	2
				7	1	2	7	1	2	1	1	1	1	1	1	1	1	1	1	1	2	2
				7	1	2	7	1	4	1	1	2	2	2	2	2	1	2	2	2	1	1
1	0	0	0			2	6	1	4	2	1	2	2	1	2	2	2	2	2	2	1	2
0	0	1	0			2	5	1	4	1	1	2	2	1	2	2	1	2	2	1	3	1														0	0	0	0	0	0	0	0	1	0	0	0	0
0	0	1	0			2	6	1	4	2	1	2	2	2	2	2	2	2	2	2	2	2
				4	3	2	6	1	4	2	1	2	2	2	2	2	2	2	2	2	2	2
				5	3	2	5	1	4	2	1	2	1	2	2	2	1	2	2	2	2	2
				7	1	2	6	1	4	1	3	1	2	2	2	2	2	2	2	2	2	2
				7	1	2	6	1	4	1	1	2	2	2	2	2	2	2	2	2	2	2
				4	3	2	4	1	4	0	1	1	1	2	2	2	2	2	2	2	2	1
1	0	0	0			3	6	1	4	2	3	2	1	2	2	2	1	2	2	2	2	2
				4	3	2	3	1	4	0	1	1	1	1	1	2	1	2	2	2	2	2
0	0	0	1			2	4	1	4	2	2	2	2	1	2	2	1	1	2	2	2	2
1	0	0	0			2	3	1	4	3	1	2	2	1	2	2	1	1	2	2	2	1
				2	3	2	6	1	4	0	1	2	2	2	2	2	2	1	2	2	2	2
1	0	0	0			2	7	1	4	1	1	1	2	2	2	2	2	2	2	2	2	2
0	0	1	0			2	4	1	4	1	1	1	1	2	1	2	1	1	2	1	1	1
				7	1	2	5	1	4	1	4	1	1	1	1	1	1	1	2	1	2	1
				7	1	2	5	1	4	3	4	2	1	1	1	2	1	1	2	2	1	2
				7	1	2	8	1	4	1	1	2	2	1	2	2	1	1	2	1	2	1
0	0	1	0			2	2	1	4	1	1	1	1	2	2	2	2	2	2	2	2	1
0	0	1	0			2	5	3	4	1	1	2	2	2	2	2	2	2	2	2	2	1
0	0	1	0			2	8	1	4	1	2	1	2	1	1	2	1	1	2	2	2	2
				7	2	3	4	1	4	2	3	2	2	1	2	2	1	1	2	3	3	1	0	0	0	0	0	0	0	0	0	0	0	0	0	0	0	0	0	0	0	0	0	0	0	0	0	0
				7	1	2	4	1	4	1	1	2	2	2	2	2	2	2	2	2	2	2
0	0	1	0			2	6	1	2	2	1	2	2	2	2	2	2	2	2	2	2	2
				7	1	2	7	1	4	1	1	1	2	2	2	2	2	1	2	2	2	2
1	0	0	0			2	7	1	4	2	1	2	1	1	2	2	1	1	2	2	2	2
0	0	1	0			2	3	1	4	3	1	2	1	1	2	2	2	1	2	2	2	2
				7	1	2	6	1	4	1	2	2	2	2	2	2	2	2	2	2	2	1
				5	3	2	7	1	4	0	2	1	1	1	1	2	1	1	2	2	2	2
				7	1	2	5	1	4	3	1	2	1	1	1	2	1	1	2	2	2	2
				7	1	2	6	1	4	2	1	2	2	2	2	2	2	1	2	1	3	1														1	0	0	0	0	0	0	0	0	0	0	0	0
0	0	1	0			2	6	1	4	1	1	2	2	2	2	2	2	1	2	2	2	2
1	0	0	0			2	6	1	4	1	2	1	1	1	2	2	1	2	2	2	2	2
0	0	1	0			2	6	1	4	1	1	2	2	2	2	2	2	1	2	2	2	2
0	0	1	0			2	5	1	4	2	2	2	2	2	1	2	1	2	2	2	2	2
0	0	1	0			2	4	1	4	2	4	2	2	2	1	2	1	2	2	2	2	2
				7	1	2	5	1	4	1	1	2	2	2	2	2	2	2	2	1	2	2
				7	1	2	4	1	2	1	1	2	1	2	2	2	1	1	2	2	2	2
0	0	1	0			2	8	2	4	1	1	2	1	1	2	2	1	1	1	2	1	1
1	0	0	0			2	3	1	4	0	1	1	1	1	2	1	1	2	2	2	2	2
				7	1	2	5	1	4	1	1	2	2	2	2	2	1	2	2	2	2	2
				7	2	2	4	1	4	3	1	2	2	2	2	2	2	2	2	2	2	2
0	0	1	0			2	3	1	4	2	4	2	1	2	2	2	1	1	2	2	2	2
1	0	0	0			2	6	1	4	0	1	1	1	1	2	1	1	1	2	2	2	2
0	0	1	0			2	3	2	4	1	1	2	1	2	1	1	1	2	2	3	2	3	0	0	0	1	1	1	1	0	1	0	1	1	0														0
0	0	1	0			2	7	1	4	2	1	2	1	1	1	2	1	2	2	2	2	1
0	0	1	0			2	4	1	4	1	2	2	1	2	1	2	2	1	2	2	2	2
0	0	1	0			2	6	1	4	2	1	2	1	2	2	2	1	1	2	2	2	1
				7	1	2	6	1	4	2	1	2	1	2	2	2	2	1	2	2	2	2
				7	1	2	6	1	4	1	1	2	1	2	2	2	1	2	2	1	3	1														0	0	0	0	0	0	0	0	0	0	0	0	0
1	0	0	0			3	6	2	4	0	1	2	2	2	2	2	2	2	2	2	2	2
1	0	0	0			2	6	1	4	3	1	2	2	2	2	2	2	2	2	2	2	2
				7	1	2	6	1	4	1	2	2	1	1	1	1	1	1	1	2	2	2
0	0	1	0			2	7	1	4	1	1	2	2	2	2	2	2	2	2	2	2	2
				7	1	2	5	1	4	3	3	2	2	1	1	2	1	2	2	2	2	2
				7	2	2	6	1	4	2	1	2	2	2	2	2	2	2	2	2	2	2
0	0	1	0			2	9	1	4	2	1	1	2	2	2	2	1	2	2	2	2	2
				7	1	2	4	1	4	1	3	1	1	2	1	1	2	1	2	2	2	2
				7	1	2	5	1	4	1	1	2	2	1	2	2	2	2	2	2	2	2
				7	1	2	9	1	4	2	2	2	2	2	2	2	2	2	2	2	2	2
0	0	1	0			2	4	1	4	2	2	1	2	1	1	2	1	2	2	2	3	1														0	0	0	0	0	0	1	0	0	0	0	0	0
				7	1	2	3	1	4	2	3	2	2	2	2	2	1	1	2	1	1	1
				7	1	2	9	1	4	2	2	2	2	2	2	2	1	1	2	2	2	2
				7	1	2	6	1	4	1	1	1	1	2	1	2	1	2	2	2	1	1
				7	1	2	5	1	4	2	2	2	2	2	1	1	1	1	2	2	1	2
				4	3	2	6	1	4	0	2	1	1	1	2	2	1	1	2	1	2	2
				7	1	3	6	1	4	2	3	2	1	1	2	1	1	1	2	2	2	2
0	0	1	0			2	6	1	4	1	1	1	1	1	2	2	1	1	1	2	2	1
				3	3	2	5	1	2	0	1	1	1	2	1	1	1	1	2	2	2	2
				2	3	4	4	2	4	0	2	1	1	1	1	1	1	1	2	2	2	2
0	0	1	0			2	4	1	4	1	1	2	2	2	2	2	2	2	2	2	2	2
				7	1	2	6	1	4	1	2	2	1	1	1	1	1	1	1	2	2	1
				7	2	2	4	1	4	4	1	2	2	2	2	2	2	2	2	2	2	2
				7	2	2	6	1	4	2	1	1	2	1	2	2	1	1	2	2	2	2
0	0	1	0			2	3	1	4	2	1	1	2	1	2	2	1	1	2	1	3	3														0	0	0	0	0	0	0	0	1	0	0	0	0	0
0	0	1	0			2	2	1	4	2	1	1	1	1	1	1	1	1	2	2	2	2
1	0	0	0			2	6	1	4	1	1	1	2	2	2	2	2	2	2	2	2	2
				7	1	2	2	1	4	1	2	2	2	2	2	2	2	2	2	2	2	2
				7	1	2	6	1	4	1	1	2	2	2	2	2	2	2	2	2	2	2
0	0	1	0			2	7	1	4	1	1	2	1	2	2	2	2	1	2	2	2	2
0	0	1	0			2	7	1	4	1	2	1	2	2	2	2	2	2	2	2	2	2
				7	1	2	6	1	4	2	1	2	2	2	2	2	2	2	2	2	2	1
				7	1	2	4	1	4	1	1	2	1	2	2	2	2	2	2	2	2	1
				7	1	2	4	1	4	1	1	2	1	2	2	2	1	1	2	2	2	2
				2	3	2	4	1	4	0	1	1	1	2	2	2	2	1	2	2	2	1
				7	1	2	6	1	4	1	1	1	1	1	2	2	1	1	2	1	2	1
0	0	1	0			2	6	1	4	2	2	2	1	2	2	1	1	1	2	1	2	1
1	0	0	0			2	6	1	4	2	1	1	1	1	1	1	1	1	1	2	2	1
				5	3	2	3	1	4	1	1	2	1	1	2	1	1	2	2	2	2	1
0	0	1	0			1	3	1	4	1		2	2	2	2	2	1	2	2	2	2	2
				7	1	2	6	1	2	1	1	2	2	1	2	2	1	1	2	1	2	1
0	0	1	0			2	7	1	2	1	1	2	2	1	2	2	1	2	2	2	2	2
0	0	1	0			2	6	1	4	1	2	1	1	1	1	1	1	1	2	2	3	1														0	0	1	0	0	0	0	0	0	0	0	0	0
0	0	1	0			2	2	1	4	1	1	2	1	1	2	2	1	2	2	2	2	2
1	0	0	0			2	7	1	4	0	2	1	1	1	2	2	1	1	2	3	3	3	0	0	0	0	0	0	0	0	1	0	0	0	0	0	0	0	0	0	0	0	0	1	0	0	0	0	0
				7	1	2	4	1	4	2	4	2	1	1	1	2	1	1	2	3	2	1	1	1	1	1	1	0	1	0	1	0	1	0	1
0	0	1	0			2	6	1	4	1	1	2	2	2	2	2	1	2	2	2	2	2
				5	3	2	5	1	4	1	2	1	1	1	1	1	1	1	1	2	2	2
0	0	1	0			2	4	1	2	2	1	2	1	2	2	2	2	1	2	2	2	2
				5	3	2	6	1	4	1	2	1	2	1	2	2	1	1	2	2	2	1
				7	1	2	3	1	4	2	1	2	2	1	2	2	2	2	2	2	2	2
				7	1	2	6	1	4	1	1	2	2	2	2	2	2	2	2	2	2	2
0	0	1	0			2	5	1	4	2	1	2	2	1	1	2	1	2	2	3	1	3	0	0	0	0	1	0	0	0	0	0	0	0	0														0
				7	1	2	5	1	4	1	1	2	1	2	2	2	1	2	2	2	2	2
1	0	0	0			2	7	1	4	1	2	2	2	2	2	2	1	1	2	1	1	2
0	0	1	0			2	5	1	4	1	2	2	1	2	2	2	1	1	1	3	2	2	0	0	0	0	0	0	0	0	0	1	0	0	0
				7	1	2	3	1	4	1	1	2	2	2	2	1	2	1	2	2	2	2
				7	1	2	6	1	4	1	2	2	2	2	2	2	2	2	2	2	2	2
				7	1	4	7	1	2	1	1	1	1	1	2	2	1	2	1	1	2	1
0	0	1	0			2	4	1	4	1	2	1	2	1	1	1	1	1	1	2	2	2
				3	3	2	3	1	4	2	2	2	1	1	2	2	2	1	2	2	2	2
0	0	1	0			2	6	1	4	2	1	2	2	2	2	2	2	1	2	2	2	2
				7	1	2	7	1	4	1	2	2	2	2	2	2	1	1	2	2	2	2
0	0	1	0			2	4	1	4	1	3	2	1	1	1	1	1	1	2	2	1	1
0	0	1	0			2	4	1	4	1	4	2	2	1	1	2	1	1	2	1	3	1														0	0	0	1	0	1	0	0	0	0	0	0	0
				5	3	2	7	1	4	0	1	2	2	1	2	2	1	2	2	2	2	1
				2	3	3	8	1	4	1	2	1	2	2	2	1	1	2	1	1	1	1
0	0	1	0			3	3	1	4	2	2	2	1	2	2	1	1	2	2	2	2	2
0	0	1	0			2	3	1	4	2	1	2	2	2	2	2	2	2	2	1	2	2
0	0	1	0			2	5	1	4	3	2	2	1	1	2	2	1	1	2	2	2	1
0	0	1	0			2	7	1	4	1	1	2	2	2	2	2	2	2	2	2	2	1
1	0	0	0			2	9	1	4	0	1	1	1	1	2	2	1	1	2	2	2	1
				7	1	2	4	1	4	3	2	2	2	2	2	2	2	2	2	2	2	2
0	0	1	0			2	6	1	4	1	1	2	2	2	2	2	1	2	2	2	2	2
0	0	1	0			2	3	1	4	1	1	1	1	1	2	2	2	1	1	1	2	1
1	0	0	0			2	6	1	4	0	1	2	2	2	2	2	2	2	2	2	2	2
1	0	0	0			2	6	2	4	0	1	1	2	2	2	2	1	2	2	2	2	2
				4	3	2	4	2	4	0	2	1	1	1	2	1	1	1	2	2	2	2
				7	1	2	3	1	4	2	1	2	2	1	1	1	1	2	2	2	2	3																											0
0	0	1	0			2	5	1	4	1	1	1	2	1	2	2	1	2	1	3	2	1	1	1	1	0	1	1	1	0	1	0	0	0	0
				7	1	2	6	1	4	1	2	2	1	1	1	2	1	1	2	2	3	3														1	1	1	1	0	0	1	0	0	0	0	1	0	0
				7	1	2	9	1	4	1	2	2	2	2	2	1	2	2	2	2	2	2
0	0	1	0			2	6	1	4	3	2	2	1	1	2	2	2	2	2	2	2	1
				7	1	2	5	1	4	2	1	2	2	2	2	2	1	2	2	1	1	3																											1
				3	3	2	6	1	4	0	1	1	2	1	1	2	1	2	2	2	2	2
0	0	1	0			2	8	1	4	2	1	2	2	2	2	2	2	1	2	2	2	2
				7	1	2	2	1	4	2	1	2	1	2	2	1	1	2	2	1	2	1
1	0	0	0			2	4	1	4	1	1	2	1	1	2	1	1	1	2	2	2	2
				3	3	2	6	1	4	0	1	2	1	2	2	2	2	2	2	2	2	2
				3	3	2	6	1	4	0	1	2	1	1	2	2	2	1	2	3	2	2	0	0	0	1	0	0	0	0	0	0	0	0	0
				7	1	2	6	1	2	1	2	2	2	1	2	2	1	2	2	1	2	2
				7	1	2	5	1	4	2	2	2	1	1	1	1	1	1	2	2	2	1
				7	1	2	4	1	4	2	1	2	2	2	2	2	2	2	2	2	2	2
				4	3	2	2	1	4	1	1	1	1	1	1	2	1	1	2	2	2	2
0	0	1	0			2	6	1	4	2	1	2	1	1	2	2	1	1	1	2	2	2
				7	1	2	3	1	4	1	1	2	2	2	2	2	2	2	1	1	2	2
				7	1	2	8	1	4	1	2	1	1	1	1	1	1	1	1	1	2	1
0	0	1	0			2	8	1	4	2	1	2	1	1	1	1	1	1	2	2	2	2
				7	1	2	2	1	4	1	2	2	2	2	2	2	1	1	2	2	1	2
				7	1	2	6	1	4	1	1	2	2	2	2	2	2	2	1	1	2	1
0	0	1	0			2	2	1	2	1	2	2	1	1	1	1	1	1	2	2	2	2
				7	1	2	5	1	4	2	2	2	1	1	1	2	1	2	1	2	2	2
				3	3	2	6	1	4	1	1	2	2	2	2	2	2	1	2	2	2	2
0	0	1	0			3	3	1	4	1	1	1	1	2	2	2	2	2	2	2	2	1
				3	3	2	4	1	4	0	2	1	1	2	1	2	1	1	2	2	2	1
0	0	1	0			2	4	1	4	1	2	1	1	2	1	2	1	1	2	2	2	2
0	0	0	1			2	4	1	4	2	1	2	1	1	2	2	1	2	2	2	2	1
				7	1	2	6	1	4	1	1	1	2	2	2	2	1	1	2	1	2	1
0	0	1	0			2	2	2	4	3	2	2	1	1	1	2	1	1	2	1	1	1
				5	3	2	2	1	4	1	1	2	1	2	2	2	2	2	2	2	2	2
0	0	1	0			2	4	1	4	1	2	1	1	1	1	1	1	1	1	1	3	2														0	1	0	0	0	0	0	1	1	0	0	0	0
				5	3	2	4	1	4	1	1	1	2	2	2	1	1	2	2	2	2	2
0	0	1	0			2	6	1	4	2	1	2	2	2	2	2	2	2	2	2	2	2
				7	1	2	5	1	4	2	2	2	2	2	2	2	2	2	2	2	2	2
0	0	1	0			2	5	1	4	2	3	2	2	2	1	1	1	2	2	1	2	2
				7	2	2	6	1	2	3	1	2	2	2	2	2	2	2	2	3	1	1	0	0	1	0	0	0	0	1	0	0	0	0	0
				7	1	2	3	1	4	1	1	2	2	2	2	2	2	2	2	2	2	2
				7	1	2	3	1	4	2	1	2	2	2	2	1	2	1	2	2	2	2
				7	1	2	5	1	2	1	1	2	1	2	2	2	2	2	2	2	2	2
0	0	1	0			2	6	1	4	1	2	1	1	2	2	2	1	1	2	2	2	2
0	0	1	0			2	6	1	4	1	2	1	1	1	2	1	1	1	2	2	1	1
				7	1	2	6	2	4	2	1	2	1	2	2	2	1	1	2	2	2	2
				7	1	2	7	1	4	1	3	1	1	2	2	2	1	1	2	2	2	2
1	0	0	0			2	3	1	4	1	2	1	1	1	1	2	1	2	2	1	2	2
				7	1	2	2	1	4	1	1	2	1	1	2	2	2	2	2	2	2	2
				7	1	2	6	1	4	2	1	2	2	2	2	2	2	2	2	2	2	2
				7	1	2	6	1	4	3	1	1	1	1	2	2	2	2	2	2	2	2
0	0	1	0			2	4	1	4	1	1	2	1	1	1	1	1	1	2	2	2	2
				7	1	2	6	1	4	2	1	2	2	2	2	2	2	2	2	3	3	3	0	0	1	0	0	0	0	0	0	0	0	0	0	0	1	0	0	0	0	0	0	0	0	0	0	0	0
0	0	1	0			2	6	1	4	2	2	2	2	1	2	2	1	2	2	2	2	2
0	0	1	0			2	4	1	4	1	1	1	1	2	2	2	2	2	2	2	2	2
0	0	1	0			2	6	1	4	2	3	2	2	2	2	2	1	2	2	2	2	2
0	0	1	0			2	6	1	4	1	1	2	1	1	1	1	1	1	2	2	1	2
				7	1	2	4	1	4	3	1	2	1	1	2	2	1	1	2	2	2	2
				4	3	2	6	1	4	0	1	1	1	1	1	1	1	1	1	3	2	2	1	1	0	0	0	0	0	0	0	0	0	0	0
				7	1	2	7	1	4	2	1	2	1	2	2	2	2	1	2	2	2	1
0	0	1	0			2	4	1	2	1	2	2	1	2	1	2	1	2	2	2	2	2
0	0	1	0			2	6	1	4	3	1	2	2	2	2	2	1	1	2	3	3	3	0	0	0	0	0	1	0	0	0	0	0	0	0	0	0	0	0	0	1	0	0	0	0	0	0	0	0
0	0	1	0			2	6	1	4	1	1	1	1	1	1	1	1	1	1	2	1	2
				7	1	2	4	1	4	2	1	2	2	2	2	2	1	1	2	2	2	2
				3	3	2	6	1	4	0	1	1	2	1	2	2	1	2	2	2	2	1
0	0	1	0			2	6	1	2	1	2	1	1	1	2	2	1	1	2	2	2	2
0	0	1	0			2	3	1	4	4	2	2	1	1	1	2	1	2	2	2	3	2														0	0	1	0	0	0	0	0	0	0	0	0	0
				7	1	2	3	1	4	4	2	2	1	2	2	2	1	2	2	2	2	2
0	0	1	0			2	7	1	2	1	3	1	2	2	1	2	1	1	2	2	2	2
0	0	1	0			2	4	1	4	1	1	2	2	1	2	2	2	1	2	2	2	1
				3	3	2	4	1	4	1	2	1	1	1	2	2	1	1	1	2	2	2
				1	3	2	6	1	4	3	1	2	2	2	2	2	2	2	2	2	2	1
0	0	1	0			2	7	1	4	1	1	2	2	2	2	2	1	1	2	1	2	1
1	0	0	0			2	4	1	4	0	1	1	1	1	2	2	1	1	2	2	2	2
0	0	1	0			2	7	1	4	1	1	2	2	2	2	1	2	2	2	1	2	1
0	0	1	0			2	6	1	4	1	1	1	2	1	1	2	1	2	2	2	2	2
				7	1	2	9	3	4	2	2	2	2	2	1	2	1	1	2	2	2	2
				7	1	2	3	1	4	3	1	2	1	1	2	2	2	1	2	1	2	2
				2	3	2	1	2	4	0	3	1	1	2	2	2	2	1	2	2	2	2
0	0	0	1			4	9	1	4	3	4	2	2	2	2	2	1	1	2	2	2	2
0	0	1	0			2	6	1	4	3	2	2	2	2	2	2	1	2	2	2	2	2
				7	1	2	6	1	4	1	1	2	2	2	1	2	2	2	2	2	2	1
0	0	1	0			2	4	1	4	1	1	2	1	1	2	2	2	2	2	2	2	2
0	0	1	0			2	6	1	4	1	1	2	1	2	2	2	2	2	2	2	2	2
1	0	0	0			2	5	1	4	2	1	2	1	2	1	2	1	1	2	2	2	2
				5	3	2	4	1	4	0	1	1	1	1	1	2	1	1	2	2	2	2
				7	1	2	6	1	2	1	2	2	1	2	1	2	1	2	2	2	2	2
0	0	1	0			3	4	1	4	1	2	1	1	1	1	2	1	1	2	1	1	1
0	0	1	0			2	7	1	4	3	1	2	2	2	2	2	2	2	2	2	1	2
				7	2	2	3	2	3	4	2	2	1	2	2	2	1	1	2	2	2	2
				7	1	2	4	1	4	1	2	2	1	2	2	2	1	1	2	2	2	2
				7	1	2	6	1	4	2	1	2	2	2	2	2	2	2	2	2	2	2
				5	3	2	6	1	4	0	2	1	2	1	2	2	1	2	2	1	2	2
0	0	1	0			2	6	1	4	2	1	1	2	2	2	2	2	2	2	2	2	2
1	0	0	0			2	7	1	2	2	2	2	2	2	2	2	2	2	2	2	2	2
0	0	1	0			2	5	1	4	2	3	2	1	2	1	1	1	1	1	2	2	2
				2	3	2	2	1	4	0	2	1	2	1	1	2	1	2	2	2	2	2
				7	1	2	6	1	2	1	1	2	1	2	2	2	2	1	2	2	2	2
0	0	1	0			2	4	1	4	1	1	2	2	2	2	2	1	2	2	2	2	2
				7	1	2	10	1	4	1	2	2	2	2	2	2	2	2	2	2	2	1
0	0	0	1			2	8	1	4	3	3	1	2	1	1	1	1	2	2	2	2	2
				7	1	2	8	1	4	1	1	1	1	1	2	2	1	1	2	2	2	2
				5	3	2	6	1	2	1	2	1	1	1	1	1	2	1	1	2	2	2
				3	3	2	8	1	4	0	1	1	2	1	2	1	1	1	2	2	2	2
0	0	1	0			2	6	1	4	2	1	2	2	1	2	2	2	1	2	1	2	1
0	0	1	0			2	6	1	4	1	1	2	1	1	2	2	1	2	2	2	2	2
				7	1	3	9	1	4	1	1	2	2	1	2	2	2	2	2	2	2	1
1	0	0	0			2	3	1	4	1	1	2	1	1	2	2	1	2	1	3	2	3	0	0	0	0	0	0	1	0	0	0	0	0	0														0
				7	1	2	3	1	2	1	1	2	1	1	2	2	1	2	2	2	1	1
0	0	1	0			2	6	1	4	3	1	2	2	2	2	2	2	2	2	2	2	2
1	0	0	0			2	3	1	4	2	4	1	2	1	1	1	1	2	2	2	2	2
1	0	0	0			2	6	1	4	1	2	1	1	1	1	1	1	1	2	2	2	1
				7	1	2	7	1	4	1	2	2	2	1	2	1	1	1	2	2	2	2
				7	1	2	4	1	4	2	1	2	1	1	2	2	1	2	2	2	1	2
1	0	0	0			2	6	1	4	1	2	1	2	2	2	2	1	1	2	2	2	2
				7	1	2	4	1	2	1	1	2	2	2	2	2	2	1	2	2	2	1
0	0	1	0			2	6	1	4	1	1	2	2	2	2	2	2	2	2	2	2	2
				7	1	2	4	1	4	1	1	1	1	1	2	1	2	1	2	1	3	3														1	0	0	0	0	0	0	0	0	0	0	0	0	0
				7	1	2	6	1	4	1	2	2	2	2	2	2	1	2	2	2	2	2
				5	3	2	3	1	4	0	1	1	1	1	2	2	1	1	2	1	2	1
1	0	0	0			2	6	1	4	1	2	1	1	2	1	1	1	1	2	2	2	1
				7	1	2	6	1	4	2	2	2	2	2	2	2	2	2	2	2	2	3																											0
				7	1	6	6	2	4	2		2	1	1	2	2	1	1	1	1	1	2
				4	3	2	7	1	4	0	1	1	1	1	2	2	1	2	2	2	2	1
				5	3	2	7	1	4	0	2	1	2	1	2	2	1	2	2	2	2	2
				7	1	2	6	1	4	1	1	1	2	1	2	2	1	1	2	2	1	1
				7	1	2	7	1	4	2	2	1	1	2	1	1	1	2	2	2	2	1
0	0	1	0			2	5	1	4	2	1	2	2	2	2	2	2	2	2	2	2	2
				7	1	2	3	1	4	5	3	2	1	2	2	2	2	1	2	3	3	3	0	0	0	0	0	0	0	0	0	0	0	0	0	0	0	0	0	0	0	0	0	0	0	0	0	0	0
0	0	1	0			2	6	1	4	1	2	2	1	2	1	2	2	2	2	2	1	2
0	0	1	0			2	5	1	4	1	1	2	2	2	2	2	1	2	2	1	1	1
0	0	1	0			2	4	1	4	2	1	2	1	1	2	2	2	1	2	2	2	2
1	0	0	0			2	6	1	4	0	1	1	2	2	2	2	1	2	2	2	2	2
				7	1	2	2	1	4	1	2	2	2	2	2	2	2	2	2	2	2	2
0	0	1	0			6	2	1	4	1		2	1	1	2	1	1	1	2	1	2	1
				7	1	2	5	1	4	1	2	1	2	1	1	2	1	2	1	1	1	1
				7	1	2	6	1	4	1	1	2	1	2	2	2	2	1	2	2	2	2
				7	1	2	5	1	2	2	2	2	1	1	1	1	1	2	2	2	2	2
				4	3	2	6	1	4	0	1	1	2	1	2	2	1	1	2	2	2	1
1	0	0	0			2	6	1	4	0	1	2	2	2	2	2	2	2	2	2	2	2
				3	3	2	4	1	4	1	1	2	2	1	2	2	2	2	2	2	2	1
				7	1	2	7	1	4	1	1	2	1	2	2	2	1	2	2	2	2	2
0	0	1	0			2	5	1	4	2	1	2	2	1	2	2	1	2	2	2	2	2
				7	1	2	9	1	2	1	1	2	2	1	1	1	1	2	2	2	2	2
				4	3	2	6	1	4	0	1	1	1	2	2	2	1	1	2	2	2	1
0	0	1	0			2	7	1	4	1	1	2	2	2	2	2	2	2	2	1	2	1
0	0	1	0			2	6	1	4	1	1	1	2	1	1	1	1	1	2	1	1	1
0	0	1	0			2	4	1	4	1	4	1	1	1	1	1	1	1	1	1	1	1
				7	1	2	3	1	4	2	1	2	2	2	2	2	2	1	2	2	2	2
0	0	1	0			2	6	1	2	3	3	2	2	1	1	1	1	1	2	1	2	2
0	0	1	0			2	6	1	2	2	2	2	1	1	2	2	1	2	2	2	2	2
				7	1	2	6	1	2	1	1	2	2	2	2	2	1	2	2	2	2	1
				7	1	2	5	1	4	1	1	2	1	1	2	2	2	1	2	2	2	2
				7	1	2	7	1	4	1	1	1	2	2	2	2	1	2	2	2	2	2
0	0	1	0			2	3	2	4	1	3	2	2	2	1	2	2	2	2	2	2	2
0	0	1	0			3	6	1	4	1	1	2	1	1	2	2	1	1	2	2	1	2
				3	3	2	3	1	4	0	1	1	2	1	2	2	1	1	2	2	2	2
0	0	1	0			2	4	1	4	1	4	2	2	1	1	2	1	1	2	2	2	2
0	0	1	0			2	10	2	4	2	1	1	2	2	2	2	1	1	1	2	2	2
1	0	0	0			2	4	1	4	0	2	1	1	1	2	1	1	2	2	1	2	2
0	0	1	0			2	7	1	4	1	1	1	2	2	2	2	1	1	2	2	2	1
				7	1	2	6	1	4	2	2	2	2	2	2	2	2	2	2	2	2	2
				7	1	2	4	1	4	1	2	1	2	1	1	2	1	1	2	2	2	3																											0
0	0	1	0			2	6	1	4	1	1	2	2	2	2	2	2	2	2	1	1	1
1	0	0	0			2	5	1	4	1	1	2	2	2	2	2	2	2	2	2	2	2
				7	2	2	6	1	2	3	2	2	1	2	2	2	2	2	2	2	2	2
1	0	0	0			2	3	1	4	1	1	1	2	2	2	2	2	2	2	2	2	2
1	0	0	0			2	7	1	2	1	1	1	2	2	2	2	1	1	2	2	2	2
0	0	1	0			2	3	1	4	2	3	2	1	2	2	2	1	2	2	2	2	2
				7	1	2	7	1	4	1	1	1	1	1	2	2	1	2	2	3	3	3	0	1	1	0	0	0	0	0	0	0	0	0	0	0	1	1	0	0	0	0	0	0	0	0	0	0	0
				7	1	2	7	1	4	4	1	2	2	2	2	2	2	2	2	2	2	2
				7	1	2	3	1	4	2	1	2	1	2	1	2	1	1	2	2	2	2
0	0	1	0			2	6	1	4	1	2	2	2	2	2	2	1	2	2	2	2	1
				5	3	2	6	1	4	0	1	1	1	1	2	2	1	1	2	2	2	2
				7	1	2	8	1	4	1	2	2	2	2	2	2	1	2	2	2	1	2
				5	3	2	4	1	4	0	1	1	1	2	2	2	1	1	2	2	2	2
				7	1	2	5	1	4	1	1	2	2	2	2	2	2	2	2	2	2	2
				7	1	2	7	1	2	1	2	2	2	2	2	2	2	2	2	2	2	2
				4	3	2	2	1	4	1	1	2	2	2	2	2	1	1	2	1	2	2
1	0	0	0			2	6	1	4	1	1	1	2	2	2	2	1	2	2	2	1	2
				7	1	2	2	1	4	2	3	2	2	2	2	1	2	2	1	2	2	2
				4	3	2	6	1	4	1	2	2	2	2	2	2	2	2	2	2	2	2
				2	3	2	7	1	4	0	1	1	2	2	2	2	1	1	2	2	2	3																											0
0	0	1	0			2	6	1	4	1	3	1	1	1	2	2	1	1	2	2	2	2
				3	3	2	7	1	4	0	1	1	1	2	2	2	1	2	2	2	2	2
0	0	1	0			2	6	1	4	2	1	2	2	2	2	2	2	2	2	2	2	2
				3	3	2	3	1	4	0	1	1	1	2	2	2	1	1	2	2	2	2
				7	1	2	4	1	4	1	1	1	1	2	2	2	1	1	2	2	2	2
				7	1	2	7	1	4	1	1	1	1	2	2	2	1	1	2	2	2	2
0	0	1	0			2	6	1	4	1	1	2	1	2	2	1	1	2	2	2	2	2
0	0	0	1			2	3	1	4	3	2	1	1	1	1	1	1	1	1	2	2	2
				1	3	3	6	1	4	0	2	2	2	2	2	2	2	2	2	2	2	2
				7	1	2	8	1	4	2	1	2	2	2	2	2	2	2	2	2	2	2
0	0	1	0			2	6	1	4	2	1	2	1	1	1	2	2	1	2	2	2	1
1	0	0	0			2	6	1	4	0	2	1	2	1	2	2	1	2	2	2	2	2
				7	1	2	5	1	4	2	1	2	2	2	1	2	1	1	2	2	2	1
				7	1	2	4	1	4	2	2	2	2	2	2	2	2	2	2	2	2	2
0	0	1	0			2	6	1	4	2	1	2	2	2	2	2	1	1	2	2	2	2
0	0	1	0			4	4	1	4	1	4	1	1	1	1	1	1	1	2	1	2	1
0	0	1	0			2	3	2	4	2	1	2	1	1	2	2	1	1	2	2	1	2
				7	1	2	3	1	2	1	2	2	2	2	2	2	2	2	2	1	2	2
				7	1	2	4	1	4	1	1	2	1	2	2	2	1	1	2	1	2	1
0	0	1	0			2	9	1	4	1	1	2	2	2	2	2	2	2	2	2	2	2
0	0	1	0			2	3	1	4	1	1	1	1	1	1	1	2	2	2	2	2	2
1	0	0	0			2	6	2	4	1	1	2	1	1	2	2	1	2	2	2	2	2
0	0	1	0			2	4	1	4	2	1	2	2	1	2	1	2	1	2	2	2	1
				7	1	2	7	1	4	1	2	2	2	2	2	2	1	2	2	2	2	2
0	0	0	1			2	6	1	4	2	1	2	2	2	2	2	2	2	2	2	2	2
				3	3	2	4	1	4	2	1	1	1	2	2	2	2	2	2	1	2	1
0	0	1	0			2	9	1	2	1	2	1	2	1	1	2	1	1	1	2	2	1
				4	3	2	4	1	4	0	1	2	2	2	2	2	2	2	2	2	2	2
				7	1	2	4	1	4	3	1	2	2	2	2	2	2	2	2	2	2	2
1	0	0	0			2	5	1	4	0	1	1	1	1	2	2	1	1	2	1	2	1
0	0	1	0			2	3	1	4	1	1	1	2	1	1	2	1	2	2	1	1	1
				7	1	2	8	1	4	1	4	2	2	2	2	2	2	2	2	2	2	2
0	0	1	0			2	8	1	4	4	2	2	2	2	2	2	2	2	2	2	2	2
				7	1	2	6	1	4	1	2	2	2	2	2	2	2	2	2	2	2	2
0	0	1	0			2	7	1	3	1	1	2	2	2	2	2	2	2	2	2	2	1
				7	1	2	9	1	4	1	2	2	1	1	1	1	1	1	2	2	2	2
0	0	1	0			2	6	1	2	1	1	2	2	2	2	2	1	2	2	2	1	2
				7	2	2	8	1	4	3	1	2	2	2	2	2	2	2	2	2	2	1
0	0	1	0			2	6	1	4	1	1	2	2	2	2	2	2	2	2	3	3	1	1	0	0	1	0	0	0	0	0	0	0	0	0	1	0	0	1	0	0	0	0	0	0	0	0	0
0	0	1	0			2	4	2	4	2	1	2	1	2	2	2	2	1	2	2	2	2
0	0	1	0			2	3	1	4	2	1	2	1	2	2	2	1	1	2	2	2	2
0	0	1	0			2	3	1	4	1	2	2	1	1	2	2	1	2	2	2	2	2
0	0	1	0			2	2	2	4	1	2	1	1	2	1	2	2	1	2	2	1	2
1	0	0	0			2	4	1	4	1	1	2	2	1	2	2	1	2	2	2	2	1
0	0	1	0			2	4	1	4	2	1	2	2	2	2	2	1	2	2	2	2	3																											0
				2	3	2	6	1	2	0	1	1	2	2	2	2	1	2	2	2	2	2
				7	1	2	8	1	2	1	2	2	2	2	2	2	2	2	2	2	1	2
0	0	1	0			2	6	1	4	2	1	1	1	1	1	1	1	1	1	2	2	1
0	0	1	0			2	6	1	4	1	2	2	2	2	2	2	1	1	2	2	2	2
1	0	0	0			2	5	1	4	2	1	2	2	2	2	2	2	2	2	2	2	2
				7	1	6	3	1	4	1		2	1	1	2	2	2	1	2	2	2	1
				7	1	2	6	1	4	1	2	1	1	1	1	2	1	1	2	1	2	1
0	0	1	0			2	6	1	4	2	1	2	2	2	2	2	2	2	2	2	2	2
0	0	1	0			2	4	1	4	1	1	1	1	2	2	2	1	1	2	2	2	2
0	0	1	0			2	4	1	4	1	1	1	1	1	2	2	1	1	2	2	2	2
0	0	1	0			2	5	1	4	3	2	2	1	1	2	2	1	2	2	2	2	2
0	0	1	0			2	8	1	4	2	1	2	2	1	2	2	2	2	2	1	1	1
				7	2	2	4	1	4	2	1	2	2	2	2	1	2	1	2	2	2	1
0	0	1	0			2	6	2	4	2	2	2	2	1	2	2	2	2	2	2	2	2
0	0	1	0			3	4	1	4	1	2	2	2	1	1	1	2	2	2	2	1	2
0	0	1	0			2	7	1	4	1	2	1	1	1	1	1	1	1	1	3	2	2	1	1	1	0	0	0	0	0	0	0	0	0	0
0	0	1	0			2	4	1	4	1	1	2	2	2	2	2	2	2	2	2	2	2
0	0	1	0			2	4	1	4	3	1	2	1	2	2	2	1	2	2	2	2	2
				7	1	3	3	1	4	1	2	2	1	2	1	2	2	2	2	3	3	3	0	0	1	0	1	1	0	0	0	0	0	0	0	0	0	1	0	1	1	0	0	0	0	0	0	0	0
1	0	0	0			2	6	1	4	1	2	1	2	1	2	2	1	2	2	1	2	1
				7	1	2	7	1	4	2	2	2	2	2	2	2	2	2	2	3	2	2	0	0	0	0	1	0	0	0	0	0	0	0	0
0	0	1	0			2	6	1	4	1	4	1	1	1	1	2	1	1	2	1	2	1
0	0	1	0			2	4	1	4	2	2	2	1	1	2	2	1	2	2	2	2	1
0	0	1	0			2	6	1	4	1	4	2	1	2	1	1	2	2	2	2	2	2
0	0	1	0			2	6	1	4	2	1	2	2	2	2	2	2	2	2	2	2	1
1	0	0	0			2	7	1	4	3	1	2	2	2	2	2	2	2	2	2	2	2
				5	3	2	6	1	4	0	1	1	2	1	2	2	1	2	2	1	3	3														0	0	0	0	0	0	0	0	0	0	0	0	0	0
				7	1	2	7	1	4	2	1	1	2	1	1	1	1	1	2	2	2	1
				7	1	2	4	1	4	1	2	2	1	2	1	2	1	2	2	2	2	2
0	0	1	0			2	4	1	4	2	1	2	2	1	2	2	1	2	2	2	2	2
				7	1	2	2	1	2	1	1	2	1	2	2	2	1	1	2	3	3	3	0	1	1	0	0	1	0	0	0	0	0	0	0	0	1	1	0	0	1	0	0	0	0	0	0	0	0
0	0	1	0			2	6	1	4	2	1	2	2	2	2	2	2	2	2	2	2	2
0	0	1	0			2	4	1	4	2	2	2	2	2	2	2	2	2	2	2	2	2
0	0	1	0			2	8	1	4	1	1	2	2	1	2	2	1	2	2	2	2	2
0	0	1	0			2	4	1	4	6	2	1	1	1	1	1	1	2	2	3	3	3	1	1	1	1	1	1	1	1	1	1	1	1	1	0	1	0	0	0	0	0	0	0	0	0	0	0	0
0	0	1	0			2	6	1	2	1	1	2	2	2	2	2	2	2	2	2	2	2
0	0	1	0			2	6	1	4	1	1	2	2	2	2	1	2	2	2	2	2	2
0	0	1	0			6	7	1	4	2		2	2	2	2	2	2	2	2	2	2	1
0	0	0	1			2	6	1	4	2	1	2	2	1	2	2	1	2	2	1	2	1
				7	1	2	3	1	4	2	1	2	1	2	2	2	2	1	2	3	2	3	0	0	0	1	0	0	0	0	0	0	0	0	0														0
				7	1	2	6	1	4	2	1	2	2	1	2	2	2	1	2	3	3	3	0	0	0	0	0	0	0	0	0	0	0	0	0	0	0	0	0	0	0	0	0	0	0	0	0	0	0
				1	3	2	5	1	4	1	1	2	1	2	2	2	1	2	2	2	2	1
				5	3	2	4	1	4	0	1	1	2	1	2	2	1	1	2	2	2	1
0	0	1	0			2	2	1	4	1	1	2	2	2	2	2	2	2	2	2	2	2
				7	1	2	4	1	4	2	1	2	1	2	2	1	1	2	2	2	1	1
				7	1	2	4	1	4	2	1	2	1	1	2	2	1	1	2	1	2	1
				7	1	2	6	1	4	2	2	2	1	2	1	1	1	1	1	2	2	2
1	0	0	0			2	7	1	4	1	1	2	1	2	2	2	1	1	2	2	2	1
				7	1	2	7	1	4	2	2	1	1	1	2	2	1	1	2	2	2	2
				7	1	2	6	1	4	1	1	2	2	1	2	2	1	2	2	1	1	1
				7	1	2	4	1	4	3	3	2	1	1	1	2	1	1	1	1	2	1
0	0	1	0			2	4	1	4	2	1	2	2	2	2	2	2	1	2	2	2	2
0	0	1	0			2	4	1	4	1	1	1	1	1	2	2	1	1	2	1	2	1
				4	3	2	10	1	4	0	3	1	1	2	2	2	2	2	2	2	1	2
0	0	1	0			2	4	2	2	2	1	2	1	1	1	1	1	1	1	2	2	1
0	0	1	0			2	6	1	4	2	3	2	1	1	1	2	1	1	2	2	2	2
0	0	1	0			2	7	1	4	3	1	2	1	1	2	1	1	2	1	1	1	1
				7	1	2	9	1	4	1	2	2	1	2	2	1	2	2	2	2	2	2
				3	3	2	4	1	4	0	1	1	1	1	2	2	1	1	2	2	2	2
0	0	1	0			2	6	1	4	1	1	2	1	2	2	2	1	1	2	2	1	1
				7	1	2	5	1	4	3	2	1	1	1	2	2	1	1	2	2	2	2
0	0	1	0			2	3	1	4	1	2	2	1	2	2	2	1	1	2	2	1	2
0	0	1	0			2	6	1	4	1	1	1	1	2	2	2	1	1	2	2	2	2
0	0	1	0			2	6	1	4	2	1	2	2	2	2	2	1	1	2	2	2	2
				7	1	2	6	1	4	1	1	2	1	2	2	2	1	2	2	2	2	2
				7	1	2	4	1	2	3	2	2	2	2	1	2	2	2	2	2	2	2
0	0	1	0			2	4	2	4	2	2	2	2	2	2	2	2	2	2	2	2	2
				7	1	4	6	1	4	1	4	1	1	1	1	1	1	1	2	1	1	1
				7	1	2	5	1	4	1	1	2	1	1	2	2	1	1	2	2	2	2
				3	3	2	4	1	4	0	1	1	1	2	1	2	1	2	2	2	2	2
				4	3	2	8	1	4	0	1	1	1	2	1	2	1	1	1	2	2	1
1	0	0	0			2	7	1	4	1	2	2	2	1	1	2	1	2	2	2	2	2
				1	3	2	4	1	4	2	1	2	1	1	1	1	1	1	2	2	2	2
				7	1	2	4	1	4	1	2	2	2	1	2	2	1	1	2	2	2	1
				7	2	2	6	1	4	2	1	2	2	2	2	2	2	2	2	2	2	2
0	0	1	0			2	6	1	4	1	1	2	1	1	2	1	1	1	2	1	2	2
				7	1	2	6	1	4	1	2	2	1	1	2	2	1	1	2	2	2	1
0	0	1	0			2	4	1	4	2	1	2	2	2	2	2	2	2	2	2	2	1
0	0	1	0			2	4	1	4	2	1	2	2	2	2	2	1	2	2	2	2	2
0	0	1	0			2	6	1	4	1	1	2	1	2	2	2	1	1	2	2	1	1
				7	1	2	4	2	4	1	1	2	2	2	2	2	2	2	2	2	2	2
0	0	1	0			2	5	1	4	1	4	2	1	1	2	1	1	2	1	2	2	2
0	0	0	1			2	4	1	4	2	1	2	2	2	2	2	2	2	2	1	2	1
				7	1	2	7	1	4	2	1	1	1	1	1	1	1	1	2	2	2	1
0	0	1	0			2	6	1	4	2	3	2	1	2	1	2	2	1	2	2	2	2
				7	1	2	6	1	4	1	2	1	1	1	2	2	1	1	2	2	2	1
0	0	1	0			2	6	1	4	1	2	2	2	1	2	2	1	2	1	2	2	3																											0
0	0	1	0			2	6	1	4	1	1	2	2	2	2	2	2	2	2	2	2	1
				7	1	2	6	1	4	1	1	1	1	1	2	2	2	1	2	3	3	3	0	0	1	0	0	0	0	0	0	0	0	0	0	0	0	1	0	0	0	0	0	0	0	0	0	0	0
0	0	1	0			2	6	1	4	1	1	2	2	2	2	1	2	2	2	2	2	1
				7	1	2	6	1	4	1	1	1	2	1	2	2	1	2	2	2	2	2
0	0	0	1			2	3	1	4	2	3	2	2	2	2	2	1	2	2	2	2	2
0	0	1	0			2	3	1	4	1	2	2	1	1	1	1	1	2	1	2	2	2
				3	3	2	6	1	4	1	2	1	1	1	2	2	1	2	2	2	2	1
				7	1	2	6	1	4	2	2	2	2	1	1	2	1	1	2	1	2	1
0	0	1	0			2	5	1	4	1	1	1	2	2	2	2	1	1	2	2	2	1
				7	1	2	7	1	4	2	2	2	2	2	2	2	2	2	2	2	1	1
0	0	1	0			2	9	1	2	2	1	2	2	2	2	2	2	2	2	2	2	1
				7	1	2	3	1	4	1	1	2	2	1	1	2	1	2	2	2	3	3														1	0	0	1	1	0	1	0	1	0	1	0	1	1
				7	1	2	3	1	4	2	2	2	2	2	2	2	2	2	2	2	1	2
				7	1	2	6	1	2	2	1	1	1	2	2	2	1	1	2	2	2	3																											0
				7	1	2	6	1	4	2	1	2	1	1	1	1	1	1	1	2	2	1
0	0	1	0			2	7	1	4	2	1	2	1	2	2	2	1	1	2	2	2	1
0	0	1	0			2	3	1	4	2	1	2	1	2	2	2	1	1	2	2	2	2
				7	1	4	9	1	4	1	4	2	2	1	1	1	1	1	2	1	3	1														0	0	0	0	0	0	0	0	0	0	0	0	0
				7	1	2	3	1	4	1	1	2	2	2	2	2	2	2	2	3	2	2	0	0	0	0	0	1	0	0	0	0	0	0	0
				5	3	2	8	1	4	1	2	2	2	2	2	2	2	2	2	2	2	2
0	0	1	0			2	2	1	4	4	1	2	1	2	2	1	2	2	2	2	2	2
0	0	1	0			2	4	1	4	3	2	2	1	2	1	2	1	2	2	1	2	2
				7	1	2	9	1	4	2	3	2	2	2	2	1	1	2	2	2	2	2
				7	1	2	6	1	4	3	1	2	1	1	2	2	1	2	2	2	2	2
0	0	1	0			2	4	1	4	1	2	1	2	2	1	2	1	2	2	2	2	2
0	0	1	0			2	6	1	4	2	1	1	1	1	1	1	1	1	2	2	1	1
0	0	1	0			2	6	1	4	2	2	2	2	2	2	2	2	2	2	2	2	2
				7	1	2	5	1	4	1	2	2	2	1	1	1	1	1	2	1	2	3																											1
				7	1	2	6	1	2	1	1	2	2	2	2	2	2	2	2	2	2	2
				5	3	2	6	1	4	1	1	2	2	2	2	2	2	2	2	2	2	3																											1
				7	1	2	3	1	4	2	1	2	2	2	2	2	2	2	2	2	2	2
1	0	0	0			2	6	1	4	2	1	2	1	2	2	1	2	1	2	2	2	2
				7	1	2	6	1	4	3	2	2	2	2	2	2	1	2	2	2	2	2
0	0	1	0			2	8	1	2	2	3	2	2	2	2	2	2	2	2	2	2	2
0	0	1	0			2	7	1	4	1	1	1	2	2	2	1	2	2	2	1	2	2
0	0	1	0			2	5	1	4	2	2	2	2	1	2	2	2	2	2	2	2	2
0	0	1	0			3	7	1	4	3	4	2	1	1	1	1	1	1	1	2	2	2
				7	1	2	6	1	4	1	2	2	2	2	2	2	2	1	2	1	2	2
				7	1	3	3	1	4	1	1	2	2	2	2	1	2	2	2	2	2	2
0	0	1	0			2	4	1	4	1	1	2	2	2	2	2	1	1	2	3	2	1	0	0	0	1	0	0	0	0	0	0	0	0	0
0	0	1	0			2	6	1	4	2	2	2	1	2	2	2	2	2	2	2	2	2
0	0	1	0			2	7	1	4	2	1	2	1	2	2	2	1	1	2	2	2	2
0	0	1	0			2	6	1	4	1	2	1	1	1	2	1	1	1	1	1	1	1
0	0	1	0			2	4	1	4	3	1	2	2	2	2	2	2	2	2	2	2	2
				7	1	2	6	1	4	1	2	2	2	2	2	2	1	1	2	2	1	2
				7	1	2	9	1	4	1	2	1	2	1	1	1	1	1	2	3	2	1	0	1	0	1	1	0	0	0	1	0	0	0	0
0	0	1	0			6	2	1	4	2		2	1	1	2	2	1	1	2	1	1	2
				3	3	2	1	1	4	2	1	2	1	2	2	2	1	2	2	2	2	2
				4	3	2	6	1	4	0	1	1	1	1	2	2	1	1	2	2	2	2
				7	1	2	6	1	4	1	1	1	1	2	2	2	1	1	2	1	1	1
				7	1	2	4	1	4	2	2	2	1	2	2	2	1	2	2	2	2	2
				7	1	2	6	1	4	2	1	2	2	2	2	2	2	2	2	2	2	2
				7	1	2	6	2	4	1	1	1	1	1	2	2	1	1	2	3	3	2	1	0	1	0	0	0	0	0	0	0	0	0	0	1	0	1	0	0	0	0	0	0	0	0	0	0
				7	1	2	4	1	4	2	1	2	2	2	2	2	2	2	2	2	2	2
				7	1	2	7	1	4	1	1	2	2	1	2	2	1	2	2	1	1	1
0	0	1	0			2	8	1	4	2	1	2	1	1	2	2	1	2	2	2	2	2
0	0	0	1			2	6	1	2	2	2	2	2	2	2	2	2	2	2	2	2	2
0	0	1	0			2	2	1	4	1	4	2	1	2	1	2	1	1	2	2	2	1
0	0	1	0			2	6	1	4	2	1	2	2	2	2	2	1	1	2	2	2	1
0	0	1	0			2	6	1	4	1	1	1	1	1	1	2	1	1	2	1	2	1
0	0	1	0			2	5	1	4	2	2	2	1	2	2	2	1	1	2	2	2	1
1	0	0	0			2	4	1	4	2	2	2	2	2	1	2	1	1	2	3	2	2	0	0	0	0	0	0	0	0	0	0	0	0	0
				7	1	2	5	1	2	2	1	1	1	1	2	2	1	1	2	2	2	2
0	0	1	0			2	6	1	4	1	1	2	1	2	1	2	1	1	2	2	2	2
				7	1	2	6	1	4	1	2	1	1	2	2	2	1	1	1	2	2	2
1	0	0	0			2	6	1	4	2	1	2	2	2	2	2	2	1	2	2	2	2
0	0	1	0			2	4	1	4	1	2	2	1	2	1	1	1	1	2	3	2	1	1	0	1	0	1	1	0	0	0	0	0	0	0
1	0	0	0			2	6	1	4	1	1	2	2	2	2	2	2	2	2	2	2	2
0	0	1	0			2	7	1	4	1	2	2	1	1	1	2	1	1	2	2	2	1
				7	1	2	6	2	4	1	1	1	1	1	2	2	1	1	2	2	2	2
				2	3	2	3	1	4	0	1	1	1	1	2	2	1	2	2	2	2	2
0	0	1	0			2	7	1	2	1	2	2	2	2	2	2	2	2	2	1	2	2
0	0	1	0			2	9	1	4	2	2	2	2	2	2	2	1	2	2	2	2	2
				7	1	2	10	1	4	1	1	1	2	2	1	1	1	1	1	2	2	1
				7	1	2	2	1	4	2	2	2	2	2	2	2	1	2	2	2	2	2
				7	1	2	5	1	4	1	1	2	1	2	2	2	1	1	2	2	1	1
1	0	0	0			2	6	1	4	0	1	1	1	2	2	2	1	1	2	2	2	2
0	0	1	0			2	5	1	4	3	1	2	2	2	2	2	1	1	2	1	2	2
1	0	0	0			2	6	1	4	1	2	1	2	2	2	2	1	2	2	2	2	2
				4	3	2	6	1	4	0	1	2	2	2	2	2	2	2	2	2	2	2
				7	1	2	5	1	4	1	3	2	2	2	2	2	2	2	2	3	3	3	0	0	0	0	0	0	0	0	0	0	0	0	0	0	0	0	0	0	0	0	0	0	0	0	0	0	0
				7	1	2	6	1	4	2	1	2	2	2	2	2	2	1	2	1	2	1
				7	1	2	6	1	4	2	1	2	2	2	2	2	2	2	2	2	2	2
0	0	1	0			2	5	1	4	1	1	1	1	1	2	2	2	2	2	2	2	2
0	0	1	0			2	6	1	4	2	1	2	2	1	2	2	2	1	2	1	2	2
				5	3	2	9	1	4	0	1	2	2	2	2	2	1	2	2	2	2	2
				3	3	2	9	1	4	0	1	1	1	1	2	2	2	1	2	2	2	2
0	0	1	0			2	4	1	4	4	1	2	1	2	2	2	2	2	2	2	2	2
				7	1	2	4	1	4	1	1	2	2	2	2	2	1	2	2	1	2	2
				5	3	2	4	1	2	0	1	1	1	2	2	2	1	1	2	2	2	2
0	0	1	0			2	6	1	4	1	1	1	1	2	2	2	1	1	2	2	1	2
				7	1	2	6	1	4	2	2	2	1	1	1	1	1	1	2	3	3	3	1	1	0	0	0	0	0	0	0	0	0	0	0	0	1	0	0	0	0	0	0	0	0	0	0	0	0
0	0	1	0			2	6	1	4	1	1	1	1	2	1	1	1	1	2	2	2	1
				7	1	2	6	2	4	2	1	2	1	2	2	2	1	1	2	1	1	1
				7	1	2	4	1	4	2	1	2	1	1	1	1	1	1	1	1	2	1
0	0	1	0			2	3	1	4	1	1	2	1	2	2	2	1	1	2	1	2	1
				7	1	2	6	1	4	1	1	2	1	1	2	2	2	2	2	2	2	1
0	0	1	0			2	4	1	4	2	1	2	2	2	2	2	2	2	2	2	2	2
				3	3	2	6	1	4	0	1	1	1	2	2	2	1	1	2	2	2	2
				4	3	2	6	1	4	3	1	1	1	1	2	2	2	2	2	2	1	1
0	0	0	1			1	3	1	4	1		2	2	2	2	2	1	2	2	1	1	1
				7	1	2	5	1	4	1	1	2	2	2	2	2	2	2	2	2	1	2
				7	1	2	9	1	4	1	1	1	1	1	2	2	1	1	2	1	1	1
				3	3	2	4	1	4	0	1	1	1	1	2	2	1	1	2	2	2	2
				7	1	2	7	1	4	2	1	2	2	2	2	2	1	1	2	3	3	3	0	0	0	0	0	1	0	0	0	0	0	0	0	0	0	0	0	0	1	0	0	0	0	0	0	0	0
				7	1	2	5	1	4	1	2	2	1	2	2	2	2	2	2	2	2	2
				1	3	2	7	1	4	2	3	2	2	2	1	1	2	2	2	3	1	2	0	1	1	0	0	0	0	0	0	0	0	0	0
0	0	1	0			2	6	1	4	2	2	1	2	2	2	2	2	1	2	2	2	2
0	0	1	0			2	4	1	4	1	2	1	1	1	2	1	1	1	2	2	2	2
				7	1	2	8	1	4	1	2	2	2	2	2	2	2	2	2	2	2	2
				5	3	2	5	1	4	0	1	2	1	1	1	2	1	1	2	2	2	1
0	0	1	0			2	6	1	4	1	1	2	2	2	2	2	1	2	2	1	3	2														1	0	0	0	0	0	0	0	0	0	0	0	0
0	0	1	0			2	3	1	2	3	1	2	1	1	2	2	1	1	2	1	2	3																											0
0	0	1	0			2	5	1	4	2	2	2	2	2	2	2	1	1	2	2	2	2
1	0	0	0			2	6	1	4	0	1	2	2	2	2	2	2	2	2	2	2	2
0	0	1	0			2	7	1	2	1	1	2	2	2	2	2	2	2	2	2	2	2
1	0	0	0			2	3	1	4	1	1	2	2	2	2	2	2	2	2	2	2	1
0	0	1	0			2	4	1	4	1	1	2	1	2	2	2	1	1	2	2	1	2
0	0	1	0			2	6	1	2	1	1	2	1	1	2	2	1	2	2	2	2	1
0	0	1	0			2	6	1	2	2	1	1	1	1	2	2	1	2	2	2	2	2
				7	2	2	6	1	4	1	2	2	2	2	1	2	2	1	2	1	3	3														0	0	0	0	0	1	0	0	0	0	0	0	0	0
				7	1	2	7	1	4	1	1	2	1	1	2	2	1	1	2	1	3	1														0	0	0	0	0	0	0	0	0	0	0	0	0
				7	1	2	9	1	4	3	2	2	2	2	2	2	2	2	2	2	2	3																											0
				7	1	2	6	1	2	2	2	1	1	1	1	1	1	1	1	3	3	2	0	0	0	0	1	0	1	1	1	0	0	1	1	0	0	0	0	1	0	1	1	1	0	0	0	1
				7	1	2	6	1	4	2	1	2	2	1	2	2	1	2	2	2	1	2
1	0	0	0			2	6	1	4	2	2	2	1	2	1	2	1	1	2	1	1	2
				7	1	2	3	1	4	3	2	2	2	1	1	1	1	1	1	3	3	3	1	0	0	0	0	0	0	0	0	0	0	0	0	1	0	1	1	1	1	1	1	1	1	1	1	0	0
				4	3	2	4	1	4	1	1	1	2	2	2	2	2	2	1	2	2	2
				7	1	2	6	1	4	1	1	1	1	2	2	2	1	1	1	3	2	1	0	0	1	0	0	0	0	0	0	0	0	0	0
				1	3	2	4	1	4	0	1	1	1	1	2	2	1	1	2	2	2	2
				7	1	2	6	2	4	2	1	2	2	2	1	2	1	2	2	2	2	2
1	0	0	0			2	8	1	4	1	1	2	2	2	2	2	2	2	2	3	2	1	0	0	0	0	0	0	0	0	0	0	0	0	0
				7	1	2	3	1	4	1	2	2	1	2	2	2	1	1	2	1	1	1
0	0	1	0			2	6	1	4	1	2	2	2	2	1	2	1	1	2	3	3	3	0	0	1	1	1	0	0	0	0	0	0	0	0	0	0	1	1	1	0	0	0	0	0	0	0	0	0
0	0	1	0			2	6	1	4	2	1	2	2	2	2	2	1	2	2	2	1	2
				4	3	2	6	1	4	0	2	2	2	1	2	1	1	1	2	2	2	2
0	0	1	0			2	6	1	4	1	2	2	2	2	2	2	2	2	1	2	2	2
				7	1	2	6	1	4	5	1	2	2	2	2	2	2	2	2	1	2	1
0	0	1	0			2	6	1	4	1	3	2	2	1	1	2	2	1	2	2	2	2
0	0	1	0			2	3	1	4	1	1	2	2	2	2	2	2	2	2	2	2	2
0	0	1	0			2	6	1	4	2	1	2	1	2	2	2	1	1	1	2	2	2
0	0	1	0			2	3	1	2	1	2	2	1	1	1	1	1	2	2	2	2	1
0	0	1	0			2	8	1	4	1	1	2	2	2	2	2	2	2	2	1	2	2
0	0	1	0			2	4	1	4	1	2	2	2	2	1	2	2	1	2	2	2	2
0	0	1	0			3	2	2	4	2	1	2	2	2	2	2	2	2	2	2	2	2
1	0	0	0			2	6	1	4	2	4	2	2	2	2	2	2	2	2	2	2	2
0	0	1	0			2	5	1	4	2	1	2	2	2	2	2	2	2	2	2	2	2
				7	1	2	6	1	4	2	1	2	1	1	1	2	1	1	2	1	1	1
				7	1	2	4	1	4	2	2	2	1	1	1	2	1	1	2	1	2	1
				7	1	2	6	1	2	2	2	2	2	2	2	2	1	2	2	1	3	2														0	0	0	0	1	0	0	0	0	0	0	0	0
0	0	1	0			2	6	1	4	3	3	2	1	2	1	1	1	1	2	3	1	1	0	1	1	1	1	0	1	1	1	0	1	0	0
				3	3	2	6	1	4	0	1	1	1	1	1	2	1	2	2	2	2	2
				3	3	2	7	1	4	0	1	1	1	1	2	2	1	2	2	2	2	1
0	0	1	0			2	6	1	4	1	1	2	1	2	2	2	2	1	2	2	2	2
				7	1	2	6	1	4	1	1	1	1	2	1	1	1	1	2	3	2	2	0	0	0	1	1	0	1	0	0	0	0	0	0
0	0	1	0			2	6	1	4	1	2	2	2	2	1	2	2	2	2	2	2	2
0	0	1	0			2	9	1	4	3	1	2	2	2	2	2	1	2	2	1	2	1
0	0	1	0			2	3	1	4	2	2	2	1	1	1	1	1	1	2	2	2	2
				7	1	2	6	1	4	2	4	2	2	2	1	2	2	2	2	2	2	2
				7	1	2	4	1	4	2	1	2	1	2	2	2	2	2	2	2	2	2
1	0	0	0			2	4	1	4	1	1	1	1	1	2	2	1	2	2	2	2	2
0	0	1	0			2	2	1	2	1	2	2	2	2	2	2	1	2	2	2	2	2
				7	1	2	9	1	4	1	1	1	1	1	1	2	1	1	2	1	2	1
0	0	1	0			2	7	1	4	1	1	2	2	1	2	2	1	1	2	2	2	1
0	0	1	0			2	5	1	4	2	2	2	2	2	2	2	2	2	2	1	1	2
				3	3	2	5	1	4	0	1	1	1	1	1	2	1	2	2	2	2	2
				3	3	2	4	1	4	0	1	1	2	1	2	1	2	2	2	2	2	2
				7	1	2	4	1	4	1	1	2	2	2	2	2	2	2	2	1	2	1
0	0	1	0			2	5	1	4	1	2	2	2	1	2	2	1	2	2	2	2	1
0	0	1	0			2	5	1	4	1	1	2	1	2	2	2	1	1	2	2	2	2
				4	3	2	9	1	4	1	1	1	1	1	2	2	1	1	2	2	2	1
0	0	1	0			2	6	1	4	2	1	1	2	2	2	2	1	2	2	2	1	2
				7	1	2	5	1	4	2	1	2	2	2	2	2	1	2	2	3	3	3	0	0	0	1	0	0	0	1	0	0	1	0	1	1	1	0	0	1	0	1	0	1	1	0	0	0	0
				7	1	2	6	1	4	1	1	2	1	1	2	2	1	1	2	2	1	1
				7	1	2	6	1	4	1	1	1	1	1	1	1	1	1	1	1	2	1
0	0	1	0			2	6	1	2	2	1	2	2	2	2	2	2	2	2	2	2	2
0	0	1	0			2	6	1	4	1	1	2	1	1	1	1	1	1	2	1	2	2
				7	1	2	3	1	4	1	3	2	2	1	1	2	1	1	2	1	2	2
				7	1	2	3	1	4	1	2	2	2	2	2	2	1	2	2	2	1	1
				7	2	2	4	1	4	2	1	1	1	1	1	1	1	1	1	1	2	1
0	0	1	0			2	4	1	4	2	1	2	2	2	2	2	2	2	2	2	2	2
				7	1	2	6	1	4	2	1	2	2	2	2	2	1	2	1	2	2	2
0	0	1	0			2	6	1	4	1	1	2	2	2	2	2	2	2	2	1	2	1
1	0	0	0			2	6	1	4	1	1	1	2	2	2	2	2	2	2	2	2	2
				3	3	2	5	1	4	0	1	1	1	1	2	2	1	1	2	2	2	1
1	0	0	0			2	6	1	4	1	1	2	2	1	2	2	1	1	2	2	2	2
				7	1	2	3	1	4	1	1	2	2	1	2	2	1	2	2	2	2	1
				7	1	2	4	1	4	1	1	2	2	2	2	2	2	2	2	2	2	2
0	0	1	0			2	5	1	4	1	1	2	2	2	2	1	2	2	2	2	2	1
0	0	1	0			2	5	1	4	1	1	2	1	1	2	1	1	1	1	1	2	1
				4	3	2	3	1	2	2	1	2	2	2	2	2	2	2	2	2	2	2
				7	1	2	3	1	4	3	1	2	1	2	2	2	2	2	2	3	3	3	0	0	0	0	0	0	0	0	0	0	0	0	0	0	0	0	0	0	0	0	0	0	0	0	0	0	0
1	0	0	0			2	3	1	4	0	1	1	1	2	2	2	2	2	2	2	2	1
				7	1	2	5	1	4	3	2	2	1	2	1	2	1	2	1	1	2	2
0	0	0	1			2	4	1	4	3	1	2	1	2	2	2	1	1	2	2	2	1
0	0	1	0			2	5	1	4	1	1	1	2	2	2	2	2	2	2	2	2	1
				7	1	2	5	1	4	1	2	1	2	2	1	1	1	2	2	1	2	1
0	0	1	0			2	6	2	4	2	1	1	1	1	1	1	1	1	1	2	1	1
				3	3	2	3	1	4	1	1	1	1	1	2	2	1	1	2	1	2	3																											0
0	0	1	0			2	4	1	4	1	2	2	2	2	2	2	2	2	2	1	2	2
				7	2	2	5	1	2	2	2	1	1	1	1	1	1	1	1	1	1	3																											1
				4	3	2	6	1	4	0	1	2	2	2	2	2	2	2	2	2	2	2
				7	1	2	6	1	4	1	1	1	1	1	2	1	1	1	2	2	2	2
0	0	1	0			2	7	1	4	1	3	2	1	1	1	2	1	1	1	3	3	3	0	1	1	1	1	0	1	0	1	1	0	0	0	0	1	1	1	1	0	1	0	1	0	0	0	0	0
				3	3	2	4	2	4	0	2	1	1	1	2	2	1	1	2	2	2	2
				2	3	1	5	1	4	0		1	1	1	2	2	1	1	2	2	2	2
				7	1	2	9	1	2	2	1	2	2	2	2	2	2	2	2	2	2	2
0	0	1	0			2	4	1	4	2	1	2	2	2	2	2	2	2	2	2	2	1
				5	3	2	6	1	4	0	1	2	1	2	2	2	2	1	1	2	2	2
0	0	1	0			2	2	1	2	1	2	2	1	2	1	2	2	2	2	1	2	2
0	0	1	0			2	7	1	4	1	3	2	1	1	1	2	1	2	2	3	1	3	0	0	0	1	0	0	0	0	0	0	0	0	0														0
0	0	1	0			2	3	1	4	3	1	2	2	2	2	2	2	2	2	2	2	2
				7	1	2	9	1	4	2	3	2	1	2	2	2	1	1	2	2	2	2
				3	3	2	3	1	4	0	2	1	1	1	1	2	1	2	2	2	2	2
0	0	1	0			2	3	1	4	1	2	2	1	1	1	1	1	2	2	2	2	2
0	0	1	0			2	4	1	4	2	1	2	2	2	2	2	2	2	2	2	2	2
0	0	1	0			2	3	1	4	1	1	2	2	1	2	2	1	1	2	1	2	1
0	0	1	0			2	6	1	4	2	1	2	2	1	2	2	1	2	2	2	2	1
				7	1	3	3	1	4	2	2	2	1	2	2	2	1	1	2	2	2	2
				3	3	2	6	2	4	1	2	1	1	1	2	2	1	2	2	2	2	2
0	0	1	0			2	6	1	4	2	2	1	1	1	1	2	1	1	2	1	2	1
				1	3	2	6	1	4	2	2	1	1	1	1	2	1	1	2	2	2	2
				7	1	2	4	1	4	3	1	2	1	2	2	2	2	2	2	2	2	2
0	0	1	0			2	6	1	4	2	1	2	2	1	2	2	1	2	2	2	1	1
				7	1	2	6	1	4	1	1	2	2	1	2	2	2	2	2	2	2	1
0	0	1	0			2	5	1	4	1	2	2	2	2	2	2	2	2	2	2	2	2
0	0	1	0			2	5	1	4	1	3	2	1	1	1	1	1	1	2	1	2	2
0	0	1	0			2	6	1	4	1	1	2	2	1	1	1	1	2	2	2	2	2
0	0	1	0			2	6	1	4	2	3	2	1	1	1	1	1	1	2	2	2	2
1	0	0	0			2	4	1	4	2	1	2	2	2	2	2	2	2	2	2	1	2
				7	1	2	9	1	4	1	1	2	1	1	2	2	1	2	2	2	2	2
1	0	0	0			2	9	1	4	1	1	1	2	1	1	2	1	2	2	2	2	2
0	0	1	0			2	6	1	4	1	2	2	2	1	2	2	2	2	2	2	2	2
				7	1	2	9	1	4	1	1	1	2	1	2	2	1	1	2	1	2	1
1	0	0	0			2	4	1	4	1	1	2	2	2	2	2	1	1	2	2	2	1
0	0	1	0			2	3	1	4	1	2	2	1	1	1	2	1	2	2	2	2	2
0	0	1	0			2	10	2	4	4	1	2	2	2	2	2	2	2	2	2	2	2
0	0	1	0			2	4	1	4	2	2	1	1	1	1	1	1	1	1	2	2	2
1	0	0	0			2	8	1	4	2	1	1	1	2	2	2	2	1	2	2	2	2
				7	1	2	10	1	4	2	2	2	1	2	2	2	2	2	2	2	2	2
0	0	1	0			2	5	1	4	2	2	2	1	1	2	2	1	1	2	2	1	1
0	0	1	0			2	4	1	4	2	1	2	2	2	2	2	2	1	2	2	2	2
0	0	1	0			2	5	1	4	3	1	2	2	2	2	2	2	2	2	2	2	2
0	0	1	0			2	7	1	2	1	1	2	1	2	2	2	1	2	2	2	2	1
				5	3	2	2	1	4	1	1	1	1	1	2	2	1	2	2	1	3	1														0	1	0	0	0	0	0	0	0	0	0	0	0
0	0	1	0			2	4	1	4	1	1	1	2	1	2	2	1	2	2	2	2	2
				3	3	2	6	1	4	0	1	1	1	1	2	1	1	1	1	2	2	2
				7	1	2	5	1	4	2	1	2	2	2	2	2	2	2	2	2	2	2
				5	3	2	4	1	4	1	2	1	1	1	1	2	1	2	2	2	2	2
0	0	1	0			2	6	1	4	1	1	2	2	2	2	2	1	1	2	2	2	2
				3	3	2	6	1	4	0	2	1	1	1	2	2	1	1	2	2	2	2
				7	1	2	4	1	4	1	1	2	2	2	2	2	2	2	2	1	2	1
				7	1	2	5	1	4	1	1	2	2	1	2	2	1	1	2	2	2	2
0	0	1	0			2	4	1	4	1	1	1	1	1	2	2	1	1	2	2	2	1
1	0	0	0			2	8	1	4	0	1	1	1	1	2	2	1	1	2	1	2	1
				3	3	2	4	1	4	0	1	1	1	1	2	1	1	1	2	1	1	1
0	0	1	0			2	6	1	4	2	1	2	2	2	2	2	1	1	2	2	2	2
0	0	1	0			2	9	1	4	1	2	2	1	1	2	2	1	2	2	1	2	1
1	0	0	0			2	4	1	4	1	2	2	2	2	2	2	1	2	2	1	2	2
0	0	1	0			2	5	1	4	3	1	1	1	1	1	2	1	1	2	2	2	1
0	0	1	0			2	3	1	4	1	2	2	2	2	2	2	2	2	2	1	2	2
0	0	1	0			2	2	1	4	2	1	2	2	2	2	2	2	2	2	2	2	1
0	0	1	0			2	8	1	2	2	1	2	2	2	2	2	1	2	2	2	2	2
				7	1	2	2	1	4	3	1	2	1	2	1	1	1	1	2	2	2	2
0	0	1	0			2	4	1	4	1	2	2	1	2	1	2	1	1	2	2	2	2
				7	1	2	3	1	4	3	1	2	1	2	2	2	2	1	2	2	1	2
1	0	0	0			2	5	1	4	2	1	2	2	2	2	2	2	2	2	2	2	2
				3	3	2	5	1	4	0	2	1	1	1	2	2	1	1	2	2	2	2
0	0	0	1			2	7	1	4	2	1	2	2	2	2	2	1	1	2	2	2	2
0	0	1	0			2	5	1	4	2	1	2	2	2	2	2	2	2	2	2	2	2
0	0	1	0			2	6	1	4	2	1	2	1	2	2	2	1	1	2	2	2	2
				7	1	2	5	1	4	2	2	2	1	1	2	2	2	2	2	2	2	2
1	0	0	0			2	9	1	4	3	2	2	2	1	1	1	1	1	2	1	1	1
1	0	0	0			2	6	1	4	2	2	2	1	1	1	1	1	1	2	2	2	2
1	0	0	0			2	6	1	4	1	1	1	1	2	2	2	2	1	2	2	2	2
0	0	1	0			2	4	1	4	2	1	2	1	2	2	1	1	1	2	2	2	2
				2	3	2	5	1	4	1	1	1	2	2	2	2	1	2	2	3	2	2	0	1	0	0	0	0	0	0	0	0	0	0	0
				7	1	2	4	1	4	1	4	2	1	2	1	1	1	2	2	2	2	1
				2	3	2	3	1	4	2	1	2	1	2	2	2	1	1	2	3	2	2	0	1	1	0	1	0	0	0	0	0	0	0	0
0	0	1	0			2	5	1	4	2	1	2	1	2	2	2	2	2	1	2	2	2
				7	1	2	7	1	4	2	1	2	2	1	2	1	1	2	2	2	2	2
				7	1	2	4	2	2	2	4	2	2	2	2	2	2	2	2	2	2	2
				7	1	2	4	1	4	3	2	2	1	1	2	2	1	1	2	1	2	2
0	0	1	0			2	4	1	4	1	1	2	2	2	1	2	1	2	2	2	2	2
0	0	1	0			2	4	1	4	1	2	2	2	2	2	2	1	2	2	1	2	2
				7	1	2	6	1	4	1	1	2	2	2	2	2	2	2	2	2	2	2
0	0	1	0			2	4	1	4	3	1	2	2	2	2	2	1	2	2	2	1	2
				7	1	2	9	1	4	1	2	1	2	2	2	1	1	1	2	1	2	2
				7	1	2	6	1	4	2	2	2	1	2	2	2	1	2	2	2	1	3																											0
				4	3	4	6	1	4	2	3	1	1	2	1	2	1	1	2	3	3	1	0	1	0	0	0	0	1	0	1	0	0	0	0	0	0	1	0	0	0	0	0	1	0	1	0	0
1	0	0	0			2	5	1	2	0	1	2	1	2	2	2	2	2	2	2	2	2
				7	1	2	4	1	4	1	1	1	2	2	2	2	2	2	2	2	2	2
				4	3	2	6	1	4	2	1	1	2	1	2	2	1	2	2	2	1	2
				7	1	2	4	2	4	1	1	2	2	2	2	2	1	2	2	3	1	1	0	0	1	0	0	0	0	0	1	0	0	0	0
0	0	1	0			2	5	1	4	1	3	1	1	1	1	2	1	1	1	1	1	1
0	0	1	0			2	5	1	4	2	1	2	1	1	2	2	1	1	2	2	2	1
				7	1	2	6	1	4	3	1	2	2	1	2	2	2	2	2	2	2	2
				7	1	2	6	1	4	2	2	2	2	1	2	2	1	2	2	2	2	2
				7	1	2	7	1	4	1	1	1	1	2	2	2	1	2	2	2	2	2
1	0	0	0			2	8	1	4	1	1	2	2	2	2	1	2	2	2	1	1	2
				7	1	2	6	1	4	1	1	2	1	1	2	1	1	1	2	3	3	3	0	0	0	1	1	0	1	0	1	0	0	0	0	0	0	0	1	1	0	1	0	1	0	0	0	0	0
0	0	1	0			2	4	1	4	2	3	2	1	2	2	2	1	2	2	2	2	2
1	0	0	0			2	4	1	4	0	1	1	2	1	2	2	2	2	2	2	2	2
				7	1	2	4	1	4	1	2	1	1	1	1	1	1	2	1	3	3	3	0	0	0	0	0	0	0	0	1	0	0	0	0	0	0	0	0	0	0	0	0	1	0	0	0	0	0
0	0	1	0			2	6	1	4	1	2	2	2	2	2	2	2	2	2	1	2	2
0	0	1	0			2	4	1	4	1	2	2	2	2	2	2	1	2	2	2	2	1
				7	1	2	7	1	4	1	1	2	2	2	2	2	2	2	2	2	2	2
				5	3	2	6	1	4	0	2	1	1	1	1	2	1	1	1	2	2	2
1	0	0	0			2	3	1	4	2	1	1	2	2	2	2	1	2	2	2	2	2
				7	1	2	10	1	4	1	1	2	2	2	2	2	2	2	2	3	3	1	0	0	0	1	0	0	1	1	0	0	0	1	0	0	0	0	1	0	0	1	1	0	0	0	1	0
				4	3	2	6	1	4	0	1	1	2	1	2	2	2	2	2	2	2	2
0	0	1	0			2	8	1	4	1	1	1	1	2	2	2	1	1	2	2	1	1
				7	1	2	9	2	4	2	3	2	2	1	2	2	2	2	2	2	2	2
				4	3	2	3	1	4	1	2	2	1	1	2	2	1	1	2	2	2	1
0	0	1	0			2	6	1	4	1	1	2	2	2	2	2	1	2	2	3	2	2	0	0	1	1	0	0	0	0	0	0	0	0	0
				7	1	2	5	1	4	1	2	1	1	1	1	1	1	2	2	2	2	2
				7	1	2	6	1	4	1	1	2	1	1	2	2	1	2	2	2	2	1
				7	1	2	9	1	4	1	1	2	2	2	2	2	2	2	2	2	2	2
1	0	0	0			2	9	1	4	2	1	2	2	2	1	2	1	1	2	2	2	2
0	0	1	0			2	4	1	4	2	1	2	1	2	2	2	1	1	2	2	1	2
				7	1	2	6	1	4	2	1	1	2	1	1	2	1	1	2	2	2	1
1	0	0	0			2	6	1	4	0	1	1	1	1	2	1	1	1	1	2	2	2
0	0	1	0			2	6	1	4	2	2	2	1	1	2	2	1	1	2	2	2	2
				2	3	2	9	1	4	0	1	1	1	1	2	2	2	2	2	2	2	1
				7	1	2	3	1	4	2	1	1	1	1	1	1	1	1	1	2	2	2
				7	1	2	5	1	4	2	1	2	1	1	1	2	1	2	2	1	3	3														0	0	0	0	1	0	0	0	0	0	0	0	0	0
				7	1	2	4	1	4	2	1	2	2	2	2	2	2	2	2	2	2	2
				7	1	2	3	1	2	1	2	2	1	2	2	2	2	1	2	1	2	2
				7	1	2	5	1	4	1	2	1	1	1	2	2	1	2	2	3	1	1	0	0	0	0	0	0	0	0	0	0	0	0	0
				7	1	2	6	1	4	1	1	2	2	2	2	2	2	2	2	2	2	2
				3	3	2	6	1	4	1	1	2	2	2	2	2	2	2	2	1	2	1
				7	1	2	7	1	4	3	1	2	2	2	2	2	2	2	2	2	2	2
1	0	0	0			2	4	1	4	1	1	2	1	2	2	2	2	2	2	2	2	2
1	0	0	0			2	4	1	4	1	1	2	2	1	2	2	1	2	2	2	2	2
0	0	1	0			2	6	1	4	2	1	2	1	2	2	2	1	2	2	2	1	2
				7	1	2	6	1	4	1	1	2	2	2	2	2	2	2	2	2	2	2
0	0	1	0			2	4	1	4	2	4	2	1	1	1	1	1	2	2	2	2	1
0	0	1	0			2	6	1	4	1	2	2	1	2	2	2	1	2	2	3	3	3	1	0	0	0	0	0	0	0	0	0	0	0	0	1	0	0	0	0	0	0	0	0	0	0	0	0	1
0	0	1	0			2	6	1	4	1	1	1	1	1	2	2	2	1	2	2	1	2
				7	1	2	6	1	4	1	1	1	1	1	2	2	1	1	2	2	2	3																											0
				7	1	2	5	1	4	1	1	2	1	2	2	2	1	2	2	2	2	2
0	0	1	0			2	6	1	4	1	1	2	1	1	2	2	1	1	2	2	2	2
				5	3	2	5	1	4	0	3	1	1	1	1	1	1	1	2	2	2	2
				3	3	2	2	1	4	1	3	1	1	2	1	2	2	2	2	2	2	2
				7	1	2	6	1	4	2	1	1	1	1	1	1	1	1	2	2	2	1
				7	1	2	8	1	4	1	1	1	1	2	1	2	1	1	2	1	1	1
				7	1	2	6	1	4	2	1	2	1	2	2	2	2	1	2	2	2	2
				3	3	2	6	1	4	0	1	1	1	2	2	2	1	1	2	2	2	1
0	0	1	0			2	6	1	4	1	1	2	2	1	1	2	1	1	1	2	1	1
0	0	0	1			2	5	1	4	2	2	2	2	2	2	2	1	2	2	2	2	2
				7	1	2	4	1	4	2	3	1	1	1	1	1	1	1	2	2	2	2
				3	3	2	4	1	4	0	2	1	1	2	2	2	1	1	2	2	2	2
1	0	0	0			2	8	1	4	2	1	1	1	1	1	1	1	1	2	1	1	1
0	0	1	0			2	4	1	4	3	2	2	2	2	2	2	1	2	1	2	2	2
0	0	1	0			2	4	2	4	2	1	2	1	2	1	1	1	1	2	2	2	2
				4	3	2	7	1	4	1	2	1	2	1	1	1	1	2	2	2	2	2
				3	3	2	6	1	4	1	2	1	1	2	2	2	1	2	2	2	2	2
				7	1	2	3	1	4	1	3	2	2	2	2	2	2	2	2	2	2	2
1	0	0	0			2	9	1	4	1	2	1	1	1	1	2	1	1	2	3	3	3	1	0	0	0	0	0	0	0	0	0	0	0	0	1	0	0	0	0	0	0	0	0	0	0	0	0	1
0	0	1	0			2	7	1	4	2	2	2	1	2	2	2	1	1	2	1	2	2
				7	1	2	9	1	4	4	1	1	1	2	2	2	2	1	1	2	2	1
				7	1	2	4	1	4	1	1	2	2	2	2	2	1	1	2	2	1	2
0	0	1	0			2	8	1	4	2	1	2	2	2	2	2	2	2	2	2	2	2
				7	1	2	3	1	4	1	4	1	1	1	2	1	1	2	2	1	1	3																											0
0	0	1	0			2	8	1	4	2	3	2	1	2	2	2	2	2	2	2	2	2
0	0	1	0			2	3	1	2	1	1	1	1	2	2	2	1	1	2	1	1	1
				7	1	2	3	1	4	2	1	2	2	1	2	2	1	1	2	2	2	2
				5	3	2	9	1	4	0	1	1	2	1	2	2	1	1	2	2	2	1
				7	1	2	6	1	4	1	1	2	2	2	2	2	2	2	2	2	2	2
0	0	1	0			2	7	1	4	1	1	2	2	2	2	2	2	2	2	2	2	2
				7	1	2	6	1	4	1	1	2	1	1	1	2	1	2	2	3	1	2	0	0	1	1	1	0	0	0	0	0	0	0	0
				7	1	2	3	1	4	1	1	2	1	1	2	2	1	2	2	1	2	1
				4	3	2	6	1	4	0	1	1	1	2	2	2	2	2	2	2	2	2
				7	1	2	7	1	4	1	1	1	1	1	1	2	1	2	2	2	1	1
0	0	1	0			2	4	1	4	2	1	2	1	2	2	2	1	1	2	2	2	1
0	0	1	0			2	6	1	4	1	1	2	2	2	2	2	2	1	2	2	2	2
				7	1	2	8	1	4	2	2	2	2	1	2	2	1	1	2	2	2	2
				5	3	2	7	1	4	1	1	1	1	1	1	1	1	1	2	3	2	2	0	1	1	0	0	0	0	0	0	0	0	0	0
				7	1	2	4	1	4	1	1	2	2	2	2	2	2	2	2	2	2	2
0	0	1	0			2	9	2	4	2	1	2	2	1	2	2	1	1	2	2	2	2
				7	1	2	4	1	2	1	1	2	1	2	2	2	2	2	2	2	2	2
0	0	1	0			2	4	1	4	2	2	1	1	2	2	2	1	2	2	2	2	2
				7	1	2	8	2	4	2	2	2	2	2	2	2	2	2	2	2	2	2
1	0	0	0			2	6	1	4	1	2	1	2	2	2	2	1	2	2	1	2	1
1	0	0	0			2	4	1	4	2	1	2	1	2	2	2	1	1	2	2	2	2
				7	2	3	6	1	4	2	3	1	1	1	1	2	2	2	2	2	2	2
				7	1	2	5	1	4	1	1	2	1	1	1	1	1	1	2	2	2	1
0	0	1	0			2	7	1	4	2	1	2	2	2	2	2	2	2	2	2	2	2
0	0	1	0			2	5	2	4	3	2	2	1	1	2	2	1	2	2	2	2	2
				5	3	2	4	1	4	1	1	1	1	1	2	2	1	1	2	2	2	2
				7	1	2	6	1	4	2	2	2	1	1	1	1	1	1	1	1	1	2
0	0	1	0			2	6	1	4	2	1	2	1	2	2	2	2	1	2	2	2	2
				7	1	2	5	1	4	2	1	2	2	2	2	2	2	2	2	2	1	2
				7	1	2	3	1	4	1	2	2	1	2	2	2	2	2	2	2	2	2
				7	1	2	6	1	4	1	3	2	2	2	1	2	2	2	2	2	2	2
0	0	1	0			2	6	1	4	1	2	2	1	1	1	1	1	1	2	2	2	2
0	0	1	0			2	6	1	4	2	1	2	1	1	2	2	1	1	2	2	2	2
				7	1	2	6	1	4	1	1	1	2	1	2	2	1	1	2	2	2	1
				7	1	2	3	1	4	3	1	2	2	1	2	1	2	1	2	1	3	1														0	0	1	0	0	0	0	0	0	0	0	0	0
				5	3	2	5	1	4	0	1	1	2	1	2	1	1	2	2	2	2	2
				7	1	2	6	1	4	2	1	2	2	1	2	2	1	2	2	2	2	2
0	0	1	0			2	2	1	2	4	1	2	1	2	2	2	2	2	2	2	2	2
0	0	1	0			2	8	1	2	1	1	1	1	2	2	2	2	1	2	3	3	3	0	0	0	0	0	0	0	1	0	0	0	0	0	0	0	0	0	0	0	0	1	0	0	0	0	0	0
0	0	0	1			2	3	1	4	2	1	2	1	2	2	2	1	2	2	2	2	2
				2	3	2	5	1	4	1	1	1	1	1	1	1	1	1	1	1	2	1
				7	1	2	6	1	2	1	1	1	2	1	2	1	2	1	1	1	1	1
				7	1	2	4	1	4	2	2	2	1	2	2	2	1	2	2	2	2	1
				2	3	2	6	1	4	1	1	1	1	1	2	1	1	2	2	1	1	1
0	0	1	0			2	5	1	4	1	1	1	1	1	2	2	1	1	2	1	2	1
				7	1	2	2	1	4	3	2	2	1	1	2	2	1	1	2	2	2	2
				5	3	2	7	1	4	0	1	1	1	2	2	1	1	1	2	2	2	2
				7	1	2	5	2	4	1	1	2	2	2	2	2	2	2	2	2	2	1
				7	1	2	6	1	4	2	2	1	2	1	2	2	2	1	2	1	2	2
0	0	1	0			2	6	1	4	2	2	2	2	2	2	2	2	2	2	2	2	1
0	0	1	0			2	6	1	4	1	2	2	2	1	2	2	1	2	2	1	2	2
0	0	1	0			2	7	1	2	2	2	2	1	2	2	2	1	1	2	1	2	2
0	0	1	0			2	3	1	4	1	1	2	1	2	2	2	1	1	2	1	3	1														0	0	0	0	0	0	0	0	0	0	0	0	0
0	0	1	0			3	5	1	4	1	2	2	1	2	2	2	1	1	2	2	2	2
				7	1	2	3	1	2	1	2	1	1	1	1	1	2	1	2	2	2	1
				7	1	2	4	1	4	2	1	2	1	2	2	2	2	2	2	2	2	2
0	0	1	0			2	7	1	4	2	2	2	1	2	2	2	2	2	2	1	2	2
				7	2	2	4	2	4	3	1	2	2	2	2	2	2	2	2	2	2	2
				7	1	2	4	1	4	1	1	2	1	2	2	2	1	2	2	1	3	1														0	0	0	0	0	0	0	0	0	0	0	0	0
				7	1	2	9	1	4	2	2	2	2	2	1	2	1	2	2	2	2	2
				7	1	2	3	1	4	2	1	2	2	2	2	2	2	2	2	2	2	2
				7	1	2	4	1	4	1	2	2	2	2	2	2	1	1	2	2	2	1
				7	2	2	3	1	4	2	2	2	2	2	1	2	1	2	2	2	2	2
				7	2	2	2	1	2	3	3	2	1	2	2	2	2	2	2	3	3	3	0	0	0	0	0	0	0	0	0	0	0	0	0	0	0	0	0	0	0	0	0	0	0	0	0	0	0
0	0	1	0			2	5	1	2	3	2	2	1	2	1	2	2	1	2	2	2	2
				7	1	2	5	1	4	2	3	1	1	2	1	1	1	2	2	2	2	2
0	0	1	0			2	6	1	4	2	2	2	2	2	1	2	2	2	2	2	2	2
				3	3	2	3	1	4	0	2	1	1	1	1	1	1	1	2	2	2	2
0	0	1	0			2	6	1	2	1	2	2	2	2	2	2	2	2	2	1	1	1
				7	1	2	3	1	4	1	1	2	2	2	2	2	2	2	2	2	2	1
				2	3	2	4	1	4	0	2	1	1	1	2	2	1	1	2	2	2	1
				7	1	2	8	1	4	3	1	2	1	1	2	2	1	1	2	2	2	1
1	0	0	0			2	4	1	4	0	1	1	1	1	2	2	1	1	2	2	2	3																											0
0	0	1	0			2	3	1	4	1	4	1	1	1	1	1	1	1	1	2	2	2
				7	1	2	6	1	4	1	2	1	1	1	1	1	1	1	1	2	2	2
0	0	1	0			2	3	1	4	1	1	2	2	2	2	2	1	2	2	2	2	2
0	0	1	0			2	6	1	4	2	1	2	1	2	2	2	1	1	2	2	2	2
1	0	0	0			2	6	2	4	0	2	1	1	1	1	1	1	1	2	2	2	2
				7	1	2	6	1	4	1	2	2	2	1	2	2	1	2	2	2	2	2
0	0	1	0			2	4	1	4	1	2	2	2	2	1	2	1	1	2	2	2	2
0	0	1	0			2	4	1	4	1	2	1	1	2	2	2	1	1	2	2	1	2
				7	1	2	3	1	4	1	1	1	1	2	2	2	1	1	2	1	2	1
				7	1	2	8	1	4	2	1	2	2	1	1	2	1	1	2	2	2	2
0	0	1	0			2	6	1	4	1	1	2	2	2	2	2	1	2	2	2	2	2
0	0	0	1			2	4	1	4	2	2	2	2	2	2	1	1	2	2	2	2	1
				7	1	2	8	1	4	2	1	2	2	2	2	2	2	1	2	2	2	2
1	0	0	0			2	4	1	2	0	2	1	1	1	1	1	1	1	1	2	2	2
0	0	1	0			2	4	1	4	2	2	2	2	1	2	2	2	2	2	1	2	2
				7	1	2	3	1	4	2	3	2	1	2	2	2	2	2	2	2	2	2
1	0	0	0			2	7	1	4	3	1	2	1	2	2	2	1	1	2	2	1	2
0	0	1	0			2	7	1	4	1	1	2	1	2	2	2	2	2	2	1	2	1
				3	3	2	2	1	4	3	1	1	1	1	2	1	1	2	2	2	2	2
				7	1	2	4	1	4	1	2	2	1	1	1	2	1	1	1	2	2	1
0	0	1	0			2	5	1	4	2	2	2	1	1	2	2	1	2	2	2	2	2
				7	1	2	6	1	4	1	1	1	2	2	2	2	1	2	2	1	2	2
				7	1	2	3	1	4	2	2	2	1	2	2	2	1	2	2	2	2	2
1	0	0	0			2	8	1	4	0	1	1	1	2	2	2	1	1	2	2	2	2
				7	1	2	4	1	4	1	1	1	1	1	2	2	1	2	2	2	2	2
				4	3	2	4	1	4	0	1	1	1	1	2	2	1	2	2	2	2	2
				7	1	2	2	1	4	2	3	2	1	1	1	2	1	1	2	2	2	2
				7	1	2	9	1	4	1	2	1	2	1	1	2	1	1	2	2	2	1
0	0	1	0			2	3	1	4	1	1	1	1	1	2	2	2	1	2	2	2	2
0	0	1	0			2	6	1	4	2	1	1	1	1	2	2	1	1	2	2	2	2
0	0	1	0			2	4	1	2	1	3	1	1	1	2	2	1	1	1	2	1	1
				7	1	2	7	1	4	1	1	1	1	2	2	2	1	1	2	1	2	1
0	0	1	0			2	8	1	4	2	2	2	2	2	2	2	2	2	2	2	2	2
0	0	1	0			2	4	1	4	3	3	2	1	1	2	2	2	1	1	2	2	2
				3	3	2	4	1	4	0	1	1	1	2	2	2	1	1	2	2	2	2
				7	1	2	6	1	4	1	1	2	1	2	2	2	2	1	2	2	2	2
0	0	1	0			2	4	1	4	3	1	2	1	1	2	1	1	2	2	1	2	1
				4	3	2	6	1	4	0	1	2	2	2	2	2	2	2	2	2	2	2
0	0	1	0			2	6	1	4	3	1	2	2	1	2	2	1	2	2	2	1	1
0	0	1	0			2	6	1	4	1	1	1	2	1	2	2	2	1	2	2	2	1
				3	3	2	4	1	4	0	1	1	2	2	2	2	2	2	2	2	2	2
				4	3	2	4	1	4	2	2	1	1	1	1	2	1	1	2	1	2	1
				7	1	2	3	1	4	1	2	2	1	1	1	1	1	2	2	2	2	2
0	0	1	0			2	6	1	4	2	2	1	2	1	1	1	1	2	2	2	2	2
0	0	1	0			2	7	1	4	2	3	2	2	2	1	1	2	2	2	2	2	2
				7	1	2	6	1	4	1	2	1	2	2	1	2	1	1	2	2	2	2
0	0	1	0			2	6	1	4	1	2	2	2	2	2	2	2	2	2	2	2	2
				7	2	2	3	1	4	3	2	1	2	2	2	2	1	2	2	2	2	1
				7	1	2	5	1	4	2	3	2	1	1	1	2	2	1	2	3	3	3	1	0	0	0	0	0	0	0	1	0	0	0	0	0	0	0	0	0	0	0	0	0	0	0	0	0	0
0	0	1	0			2	6	1	4	1	1	2	2	2	2	2	1	1	2	2	2	1
0	0	1	0			2	6	1	4	2	2	2	1	2	1	2	2	2	2	2	2	2
				7	1	2	6	1	4	1	1	1	1	1	1	1	1	1	1	2	2	2
				7	1	2	3	1	4	1	2	2	1	2	2	2	2	2	2	2	2	1
0	0	1	0			2	6	1	4	1	1	1	2	1	2	2	2	2	2	1	2	1
				7	1	2	7	1	4	2	1	2	2	2	2	2	2	2	2	2	2	2
0	0	1	0			2	3	1	4	3	1	2	2	2	2	2	2	2	2	2	2	2
				7	1	2	7	1	4	1	2	2	1	2	2	2	1	2	2	2	2	2
0	0	0	1			2	3	1	4	3	3	1	1	2	2	2	2	2	1	2	2	2
1	0	0	0			2	6	1	4	1	1	1	2	1	2	2	1	2	2	1	2	1
0	0	1	0			2	4	1	4	2	2	2	1	2	2	2	1	1	2	3	3	3	0	0	0	0	0	0	0	0	0	0	0	0	0	0	0	0	0	0	0	0	0	0	0	0	0	0	0
				4	3	2	4	1	4	2	1	1	2	1	2	2	1	2	2	2	2	2
				7	1	2	5	1	4	3	1	2	2	1	1	2	1	1	1	1	2	2
1	0	0	0			2	7	1	4	0	1	1	2	2	2	2	1	2	2	2	2	2
				7	1	2	7	1	4	3	1	2	1	1	2	2	2	2	2	2	2	1
0	0	0	1			2	4	1	4	3	1	2	2	2	2	2	1	1	2	1	1	1
0	0	1	0			2	7	1	4	1	1	2	2	2	2	2	2	2	2	2	2	1
				7	1	2	6	1	2	1	1	1	2	1	1	1	1	1	2	3	2	1	0	0	0	1	0	0	0	0	0	0	0	0	0
				7	1	2	6	1	4	2	1	2	2	2	2	2	2	2	2	2	2	1
				7	1	2	6	1	4	1	1	2	1	1	2	2	1	1	2	2	1	2
0	0	1	0			2	6	1	4	1	2	2	2	2	2	2	1	2	2	2	2	2
0	0	1	0			2	5	1	4	3	1	2	2	2	2	2	2	1	2	1	1	2
				7	1	2	6	1	4	2	1	1	1	1	1	1	1	1	1	2	2	2
				7	1	2	9	1	4	1	2	1	2	2	1	2	1	1	2	2	2	2
				7	2	2	3	1	4	2	1	2	2	2	2	2	2	1	2	1	1	1
1	0	0	0			2	6	1	4	0	1	2	1	2	2	2	2	1	2	2	2	2
0	0	1	0			2	3	1	4	3	3	2	1	1	1	2	2	1	2	2	2	1
				4	3	2	3	1	4	0	2	1	2	2	2	2	1	1	2	2	2	2
0	0	1	0			2	6	1	4	1	2	2	2	2	2	2	1	2	1	2	1	2
				7	1	2	6	1	4	1	2	2	2	2	2	2	2	2	2	2	2	2
				7	1	2	2	1	2	3	1	2	1	2	2	2	1	1	2	1	1	2
				3	3	2	4	1	4	2	1	1	1	1	2	1	1	2	2	1	2	1
				7	1	2	6	1	4	2	2	2	2	2	2	2	2	2	2	2	1	1
0	0	1	0			2	4	1	4	1	1	1	1	1	1	2	1	1	2	2	2	1
				7	1	2	3	1	4	2	1	1	1	1	1	1	2	1	2	2	2	2
				5	3	2	6	1	4	0	1	1	1	1	2	2	1	2	2	2	2	2
				7	1	2	4	1	4	3	2	2	2	2	2	2	2	1	2	2	1	2
				7	1	2	4	1	4	3	1	2	2	2	2	2	2	2	2	2	2	1
				7	1	2	6	1	4	1	1	1	1	1	2	1	1	1	2	2	2	2
				7	1	2	6	1	4	2	1	2	2	2	2	1	1	1	2	2	2	1
1	0	0	0			2	4	1	4	2	1	2	2	2	2	2	1	2	2	2	2	2
0	0	1	0			2	9	2	4	2	2	2	1	1	2	2	1	2	2	2	2	2
0	0	1	0			2	4	1	4	3	1	2	2	2	2	2	2	2	2	2	1	2
0	0	1	0			2	4	1	4	2	1	2	1	2	2	2	1	2	2	2	1	1
1	0	0	0			2	6	1	4	2	1	2	2	2	2	2	2	2	2	2	2	2
				7	2	2	4	1	2	3	3	1	1	2	2	2	1	2	2	2	2	2
0	0	1	0			2	6	1	4	1	1	2	2	2	2	2	2	2	2	2	2	2
0	0	1	0			2	6	1	4	2	1	2	2	2	2	2	2	2	1	2	2	2
				7	1	2	6	1	4	2	1	2	1	2	2	2	1	1	2	2	2	2
0	0	1	0			2	7	1	4	1	1	2	2	2	2	2	2	1	2	2	2	1
				7	1	1	3	1	4	2		2	1	2	2	2	2	2	2	2	2	2
0	0	1	0			2	3	1	4	2	1	2	2	1	2	2	1	1	1	1	2	2
				7	2	2	1	1	4	4	1	2	1	2	2	1	2	2	2	2	2	2
				7	1	2	6	1	4	1	1	2	2	2	2	2	2	2	2	1	2	1
				5	3	2	6	1	4	0	1	1	1	1	1	1	1	1	1	3	2	1	1	1	0	1	1	0	0	0	0	0	0	0	0
				7	1	2	4	1	4	3	1	2	1	1	2	2	1	1	2	2	2	2
				7	1	2	7	1	4	2	1	1	1	1	1	2	1	1	2	2	2	2
1	0	0	0			2	7	1	4	1	1	1	2	2	2	1	1	2	2	2	2	3																											0
				7	1	3	8	1	4	1	1	2	1	2	2	2	2	1	2	1	1	3																											0
				7	1	2	6	1	4	1	2	2	1	2	2	2	1	1	2	2	2	2
				7	1	2	2	1	4	1	1	2	2	2	2	2	2	2	2	3	3	3	0	0	0	0	0	0	0	0	0	0	0	0	0	0	0	0	0	0	0	0	0	0	0	0	0	0	0
1	0	0	0			2	6	1	4	1	1	2	2	2	2	2	2	2	2	2	2	2
				4	3	2	5	1	4	1	1	2	2	2	2	1	1	1	1	2	2	1
				5	3	2	3	1	4	3	1	2	2	2	2	2	1	2	2	2	2	2
				7	1	2	10	1	2	1	2	2	2	2	1	1	1	2	2	2	2	2
				3	3	2	5	1	4	0	2	1	1	2	1	1	1	1	2	2	2	2
				7	1	2	6	1	4	2	2	2	1	1	1	1	1	1	1	1	1	1
				7	1	2	3	1	4	2	1	2	1	1	2	2	1	1	2	2	2	2
1	0	0	0			2	9	1	4	1	1	1	1	1	2	2	1	1	2	2	2	2
				7	1	2	6	1	4	3	3	1	2	2	2	2	2	2	2	1	2	1
				7	1	2	3	1	4	4	2	2	2	2	1	1	1	2	2	2	2	2
				7	1	2	6	1	4	2	1	2	1	1	2	2	2	1	1	2	2	1
				7	1	2	6	1	4	2	1	2	1	2	2	2	2	1	2	2	2	2
				7	1	2	6	1	2	2	1	2	1	2	2	2	2	2	2	2	2	2
0	0	1	0			4	2	1	4	2	3	2	1	1	1	2	1	1	2	2	2	2
				7	2	2	6	1	2	2	1	2	2	2	2	2	1	1	1	2	1	1
				5	3	2	7	1	4	0	1	1	1	2	2	2	1	2	2	2	2	1
				7	1	2	9	1	4	1	1	1	2	2	2	2	2	2	2	1	1	2
0	0	1	0			2	6	1	4	1	1	2	2	2	2	2	2	1	2	1	2	1
0	0	1	0			2	3	1	4	3	2	2	2	1	2	2	2	2	2	2	1	2
				4	3	2	6	1	4	0	2	1	1	1	1	1	1	2	2	2	2	2
0	0	1	0			2	3	1	4	1	2	2	1	2	2	2	2	1	2	2	3	2														0	0	0	0	0	0	0	0	0	0	0	0	0
0	0	1	0			2	5	1	4	2	3	2	1	1	1	1	1	1	1	2	2	2
				7	1	2	3	1	4	2	2	2	1	1	1	1	1	1	2	2	2	1
				7	1	2	5	1	4	2	1	2	2	2	2	2	2	2	2	2	3	1														0	0	0	0	0	1	0	0	0	0	0	0	0
				4	3	2	5	1	4	0	1	2	2	2	2	2	2	2	2	2	2	2
				7	1	2	8	1	4	1	1	1	1	1	1	2	1	1	2	3	3	2	0	0	1	0	1	0	0	0	0	0	0	0	0	0	0	1	0	1	0	0	0	0	0	0	0	0
				7	1	2	6	1	4	1	3	1	1	1	1	1	1	1	1	2	2	2
0	0	1	0			2	9	1	4	2	1	2	2	2	2	2	1	1	2	2	2	2
0	0	0	1			2	6	1	4	2	1	2	2	2	2	2	1	2	1	2	1	2
				7	1	2	3	1	4	2	1	2	1	1	1	2	1	1	2	1	1	3																											1
				7	1	2	3	2	4	1	1	2	1	1	1	2	1	1	2	2	2	1
				7	1	2	6	1	4	1	1	2	1	2	2	2	2	2	2	2	2	2
				2	3	2	8	1	4	0	1	1	1	2	2	2	2	1	2	3	3	3	0	0	0	0	0	0	0	0	0	0	0	0	0	0	0	0	0	0	0	0	0	0	0	0	0	0	0
				7	1	3	3	1	4	1	2	2	2	2	1	2	2	2	2	2	2	2
0	0	1	0			2	6	1	4	1	1	2	2	1	2	2	2	2	2	3	2	2	0	0	1	1	0	0	0	0	0	0	0	0	0
1	0	0	0			2	6	1	4	1	1	2	1	2	2	2	2	2	2	2	2	1
0	0	1	0			2	4	1	4	1	1	2	2	2	2	2	2	2	2	2	2	2
				7	1	2	3	1	4	1	1	2	2	2	2	2	2	2	2	2	2	2
				7	1	2	3	1	2	4	2	2	2	1	2	2	2	2	2	2	2	2
1	0	0	0			2	6	1	4	0	1	2	2	2	2	2	2	2	2	2	2	2
0	0	1	0			2	6	1	4	2	1	2	2	1	2	2	2	1	2	2	2	2
0	0	1	0			2	3	1	4	3	3	2	1	1	1	1	1	1	2	2	2	1
1	0	0	0			2	8	1	4	1	1	1	2	1	2	1	1	1	2	2	2	1
				7	1	2	6	1	4	2	2	2	2	1	1	1	1	1	2	2	2	2
				7	1	2	8	1	4	1	1	2	2	2	2	2	2	2	1	2	2	2
				7	1	2	6	2	4	1	1	2	2	1	2	2	1	2	2	1	3	3														1	1	0	1	0	0	0	0	0	0	0	0	0	0
				7	1	2	4	1	4	1	2	1	1	2	1	2	2	1	2	2	2	1
0	0	1	0			2	4	1	4	2	3	1	1	1	1	2	1	2	2	1	2	1
0	0	1	0			2	6	1	4	2	2	2	1	2	2	2	1	1	2	1	1	2
				7	1	2	8	1	4	1	1	2	2	2	2	2	2	2	2	2	2	2
0	0	1	0			2	6	1	4	1	2	2	1	2	2	2	1	2	2	2	2	2
0	0	0	1			2	6	1	4	2	1	2	2	2	2	2	2	2	2	2	2	1
1	0	0	0			2	5	1	4	1	1	1	1	1	2	2	2	2	2	2	2	2
				7	2	2	6	1	4	2	1	2	2	2	2	2	1	2	2	2	2	2
1	0	0	0			2	6	1	4	1	2	1	1	1	1	1	1	1	2	3	2	1	1	1	0	0	0	0	0	0	1	0	0	0	0
				3	3	2	6	1	4	2	2	2	2	2	2	2	2	2	2	2	2	2
				7	1	2	5	1	2	2	2	2	2	2	2	2	1	2	2	2	2	2
				7	1	2	6	1	2	1	2	1	1	1	1	1	2	1	1	2	2	2
1	0	0	0			2	4	1	4	2	2	2	1	1	2	2	1	1	2	2	2	1
0	0	1	0			2	1	1	4	2	1	2	2	2	2	2	2	2	2	2	2	2
				7	1	2	7	1	4	2	1	2	2	2	2	2	2	2	1	2	2	2
0	0	1	0			2	5	1	4	2	3	2	1	2	2	2	2	2	2	2	2	2
				3	3	2	8	1	4	1	1	1	1	1	2	2	2	2	2	2	2	2
				7	1	2	6	1	4	1	2	2	2	2	2	2	2	2	2	3	3	2	1	1	1	1	1	0	0	0	0	0	0	0	0	0	0	0	1	1	0	0	0	0	0	0	0	0
				7	1	2	3	1	4	1	2	2	1	1	1	1	1	2	2	3	3	3	1	0	0	0	0	0	0	0	0	0	0	0	0	0	0	0	0	0	0	0	0	0	0	0	0	0	1
0	0	1	0			2	2	1	2	2	1	2	1	2	2	2	2	2	2	2	2	2
0	0	1	0			2	6	1	4	2	1	2	1	2	1	2	1	1	2	2	2	1
				1	3	2	4	1	4	1	1	1	1	1	2	1	1	1	2	2	2	2
				7	1	2	7	1	4	1	1	2	1	2	2	1	1	1	2	2	2	1
				3	3	2	4	1	4	1	2	1	1	1	1	2	1	1	2	3	2	2	0	0	0	1	1	0	1	0	0	1	0	0	1
				7	1	2	2	1	4	2	2	2	2	2	2	2	2	2	2	2	2	2
0	0	1	0			2	5	2	4	2	2	2	1	1	1	2	1	1	2	3	3	1	0	0	0	0	1	0	0	1	0	0	0	0	0	0	0	0	0	1	0	0	1	0	0	0	0	0
				7	1	2	6	1	4	2	1	2	2	2	2	2	2	2	2	2	2	2
				7	1	2	6	1	4	2	2	2	2	2	2	2	1	1	2	1	2	1
0	0	1	0			2	6	1	4	1	1	2	1	2	1	2	2	2	2	3	3	3	0	0	0	1	1	1	0	0	0	0	0	0	0	0	0	0	1	1	1	0	0	0	0	0	0	0	0
				1	3	2	7	1	4	1	2	2	2	2	2	1	1	2	2	2	2	1
				7	1	2	4	1	2	1	4	2	2	2	2	2	1	2	2	2	2	2
0	0	1	0			2	9	1	4	2	2	2	2	2	2	2	1	1	2	2	2	2
0	0	1	0			2	5	1	4	1	1	1	1	2	2	1	2	1	2	2	2	2
				5	3	2	6	1	4	0	1	1	1	1	1	1	2	1	2	1	2	2
				7	1	2	3	1	2	1	2	2	1	1	1	1	1	1	2	3	3	3	0	0	0	0	0	0	0	1	0	0	0	0	0	0	0	0	0	0	0	0	1	0	0	0	0	0	0
				7	1	2	3	1	4	1	1	2	1	1	1	2	1	1	2	2	2	2
				7	1	2	3	1	2	4	1	2	1	2	2	1	2	2	2	2	2	2
				7	1	2	5	1	4	2	2	2	1	1	2	2	1	2	2	2	2	2
0	0	1	0			2	3	1	4	1	1	2	2	2	2	2	1	2	2	2	2	2
0	0	1	0			2	6	1	4	2	1	2	2	2	2	2	2	2	2	2	2	1
0	0	1	0			2	8	1	4	1	1	1	2	1	2	2	1	2	2	2	2	1
0	0	1	0			2	4	1	4	2	2	2	2	2	2	2	2	2	2	2	2	1
				7	1	2	4	1	4	2	1	1	2	1	1	2	2	1	2	3	2	1	0	1	0	1	0	0	1	0	1	0	0	0	0
				7	1	2	6	1	4	3	1	2	1	2	2	2	1	1	2	2	2	2
0	0	1	0			2	4	1	2	2	1	2	1	2	1	2	1	1	2	2	1	2
0	0	1	0			2	6	1	4	1	2	2	1	2	1	1	1	1	2	1	2	2
0	0	1	0			2	6	1	4	1	1	1	2	2	2	2	1	2	1	2	2	1
0	0	1	0			2	4	1	4	1	2	1	1	1	1	2	1	1	1	2	2	1
				7	1	2	6	1	4	2	1	2	2	2	2	2	1	2	1	2	1	1
				3	3	2	4	1	4	0	1	1	1	1	2	1	2	1	2	2	2	1
0	0	1	0			2	4	2	4	2	1	2	2	2	2	2	2	2	2	1	1	1
				7	1	2	6	1	4	2	3	2	2	2	2	2	2	2	2	2	1	2
				7	1	2	3	1	4	1	2	2	2	1	1	2	2	2	2	2	2	1
				7	1	3	3	1	4	1	2	2	1	2	1	1	2	1	2	1	2	1
0	0	1	0			2	5	1	4	1	1	2	2	2	2	2	1	1	2	2	2	1
				3	3	2	7	1	4	1	1	1	2	2	2	2	1	2	2	1	2	2
				3	3	2	3	1	4	0	1	1	1	2	2	2	1	1	2	2	2	2
0	0	1	0			2	6	1	4	1	2	2	1	1	2	1	1	1	2	1	3	1														0	0	1	0	0	0	0	1	1	0	0	0	0
				7	1	2	5	1	4	4	2	2	1	1	2	2	2	2	2	2	2	2
0	0	0	1			2	5	1	2	3	1	1	2	2	2	2	2	2	2	2	2	2
				7	1	2	8	1	4	1	1	1	1	2	2	2	1	1	2	2	3	3														0	0	0	0	0	0	0	0	0	0	0	0	0	0
1	0	0	0			1	6	1	4	0		1	2	1	2	2	1	2	2	1	2	1
				7	1	2	3	1	4	1	2	2	1	2	2	2	1	1	2	2	2	2
0	0	1	0			2	6	1	4	3	1	2	2	2	2	2	2	2	2	2	2	2
0	0	1	0			2	4	2	4	2	2	2	2	2	2	2	2	2	2	3	3	3	0	1	0	0	0	0	0	0	0	0	0	0	0	0	1	0	0	0	0	0	0	0	0	0	0	0	0
				7	1	2	5	1	4	4	2	2	1	2	2	2	2	1	2	1	2	1
0	0	1	0			2	6	1	4	4	1	2	2	2	2	2	1	2	2	2	2	2
				1	3	2	4	1	4	0	2	1	1	1	1	2	1	1	1	2	2	2
1	0	0	0			2	4	1	4	1	2	1	2	1	2	2	1	2	2	2	2	1
0	0	1	0			2	4	1	4	2	2	2	1	2	1	1	1	1	2	1	2	2
				7	1	2	4	1	4	1	2	1	1	1	1	1	1	1	2	2	1	2
0	0	1	0			2	7	1	4	2	1	2	2	2	2	2	2	2	2	2	2	2
				7	1	1	1	1	4	1		2	1	1	2	2	1	1	2	2	2	2
0	0	1	0			2	4	1	4	1	2	2	1	2	1	2	1	2	2	2	1	1
0	0	1	0			2	6	1	4	1	2	1	1	2	2	2	1	2	2	2	1	2
				7	1	2	4	1	4	2	1	2	2	2	2	2	2	2	2	2	2	2
				7	1	2	6	1	4	2	3	2	2	2	2	2	1	2	2	2	1	1
0	0	1	0			2	4	1	4	1	2	2	2	1	2	2	1	1	2	1	2	2
				7	1	2	8	1	4	2	4	2	2	2	1	2	1	1	2	3	2	2	1	1	1	0	0	0	0	0	0	0	0	0	0
				7	1	2	3	1	2	2	1	2	2	2	2	2	2	2	2	2	2	2
0	0	1	0			2	7	1	4	2	2	2	2	2	2	2	2	2	2	2	2	2
0	0	1	0			2	3	2	4	2	3	2	1	1	1	1	1	1	2	3	3	1	1	1	1	0	1	1	1	1	1	0	1	0	0	0	0	1	0	0	0	0	0	0	0	0	0	0
				7	1	2	4	1	4	2	2	2	1	2	2	2	1	1	2	2	2	2
				7	1	2	8	1	4	2	1	2	2	2	1	2	1	1	2	1	2	2
				7	1	2	4	1	4	2	2	2	2	2	2	1	1	1	2	2	2	2
				3	3	2	5	1	2	1	1	1	1	1	2	2	1	2	2	2	2	1
0	0	1	0			2	6	1	4	1	1	1	2	1	1	2	1	1	2	2	2	2
0	0	1	0			2	6	1	4	1	1	2	2	1	2	2	1	1	2	2	2	2
				7	1	2	6	1	4	2	1	2	2	1	2	2	1	1	2	2	2	2
				7	1	2	6	1	4	1	1	2	2	2	2	2	2	2	1	2	2	1
				7	1	2	5	1	4	1	1	2	2	1	1	1	1	1	2	2	2	2
				7	1	3	5	1	4	1	2	2	2	2	1	1	1	1	2	2	2	1
				7	1	2	6	1	4	1	1	2	2	2	2	2	2	1	2	2	2	2
				7	1	2	2	1	4	2	1	2	1	1	1	2	1	2	2	2	2	2
				3	3	2	4	1	4	2	1	1	1	2	2	2	1	2	2	2	2	1
0	0	1	0			2	6	1	4	1	1	1	1	1	2	1	1	1	1	1	2	1
				7	1	2	6	1	4	4	2	2	1	2	2	2	1	2	2	2	2	1
				5	3	2	5	1	4	1	2	1	2	2	1	1	1	2	2	2	2	3																											0
0	0	1	0			2	8	1	2	2	2	2	2	2	2	2	2	2	2	2	2	2
				7	1	2	2	1	4	1	3	2	2	2	2	2	1	2	2	2	2	2
				7	1	2	3	1	4	2	1	2	1	1	2	2	1	1	2	1	1	1
				7	1	2	6	1	4	2	1	2	2	2	2	2	1	1	2	2	2	2
0	0	1	0			2	4	1	4	1	2	1	1	1	1	1	1	1	2	2	1	2
1	0	0	0			2	4	1	4	2	1	2	1	2	2	2	2	1	2	2	2	2
0	0	1	0			2	4	1	4	3	2	2	2	2	2	2	2	2	2	1	2	2
				7	1	2	6	1	4	1	1	2	1	1	2	2	1	1	2	2	2	1
				7	1	2	4	2	4	2	1	2	2	2	2	2	2	2	2	2	1	1
				7	1	2	7	1	4	1	1	2	2	1	2	2	1	1	2	1	2	1
0	0	1	0			2	4	1	4	2	3	1	1	2	1	1	1	1	2	2	2	2
0	0	1	0			2	4	1	4	1	1	2	2	2	1	2	1	2	2	2	2	2
0	0	1	0			4	3	1	4	1	4	2	1	1	1	2	1	1	2	1	1	2
				5	3	2	5	1	4	1	1	1	1	1	2	2	2	2	2	2	2	2
				7	1	2	6	1	4	2	2	2	1	2	2	2	1	2	2	1	2	1
				3	3	2	4	1	4	0	1	1	1	2	2	2	1	2	2	2	2	3																											0
				7	1	2	6	1	4	3	1	2	1	2	2	2	1	1	2	1	3	3														0	0	0	0	0	0	0	0	1	0	0	0	0	0
				7	1	2	6	1	2	2	1	2	2	2	2	2	2	2	2	2	2	2
0	0	1	0			2	5	1	4	1	1	2	1	1	2	2	1	1	1	2	2	1
0	0	1	0			2	6	1	4	3	1	2	1	2	2	2	1	1	2	1	1	1
				3	3	2	7	1	4	0	1	1	2	2	2	2	1	2	2	2	2	1
				7	1	2	6	1	4	2	2	2	2	1	2	2	2	2	2	2	2	2
				7	1	2	4	1	4	1	1	2	1	2	2	1	1	1	2	2	1	1
				7	1	2	3	1	2	1	1	2	2	1	2	1	2	2	2	2	2	2
				2	3	2	5	1	4	0	2	1	1	1	2	2	1	1	2	2	2	2
				7	1	2	6	1	4	3	1	2	1	1	2	2	1	1	2	1	2	1
				7	1	2	3	1	4	3	1	2	1	2	2	2	1	2	2	2	2	2
				7	1	2	3	1	2	2	2	2	2	2	2	2	2	2	2	2	2	2
0	0	1	0			2	5	1	4	5	2	2	2	2	2	1	1	1	1	2	2	2
0	0	1	0			2	3	1	4	3	2	2	1	2	1	1	1	1	2	2	2	2
				7	1	2	3	1	4	1	1	2	2	2	2	2	2	2	2	2	2	2
				7	1	2	6	1	4	1	1	2	2	1	1	1	1	2	2	2	2	2
				3	3	2	4	1	4	0	1	2	1	2	2	2	1	2	2	2	2	2
0	0	1	0			2	4	1	4	1	2	2	1	1	2	2	1	2	1	2	2	2
				7	1	2	6	1	2	2	2	2	2	2	2	2	2	2	2	2	2	2
0	0	1	0			2	3	1	4	2	3	2	2	2	2	2	1	1	2	1	3	1														0	1	1	0	0	0	0	0	0	0	0	0	0
				7	1	6	2	2	4	3		2	1	2	1	1	1	2	2	2	2	2
0	0	1	0			2	4	1	4	2	1	2	2	2	2	2	2	2	2	2	2	1
0	0	1	0			2	3	1	4	1	1	2	2	2	2	2	2	2	2	2	2	2
				7	1	2	6	1	4	1	1	2	2	2	2	2	1	2	2	2	2	1
				7	1	2	4	1	4	3	2	2	1	2	2	2	2	1	2	1	2	2
1	0	0	0			2	6	1	4	0	1	1	1	1	1	1	1	1	2	2	3	2														1	1	0	1	1	0	1	0	1	0	1	0	1
				5	3	2	7	1	4	2	1	1	2	1	2	2	1	1	2	2	2	1
				7	1	2	6	1	2	3	1	2	2	1	2	2	1	2	2	1	1	3																											0
0	0	1	0			2	2	2	4	2	2	2	1	1	2	2	2	1	1	2	2	2
0	0	1	0			2	6	2	4	2	1	1	1	1	1	2	1	2	2	2	2	2
				7	1	2	6	1	4	2	1	2	2	2	2	2	2	2	2	1	1	3																											0
				2	3	2	4	1	4	0	1	1	2	2	2	2	2	2	2	2	2	2
				7	1	2	5	1	4	2	1	2	1	2	2	2	1	2	2	2	2	2
				7	1	2	6	1	4	2	1	2	2	2	2	2	2	2	2	2	1	1
				7	1	2	7	1	4	3	1	2	1	1	2	2	2	1	2	1	2	2
				7	1	2	6	1	4	1	3	1	1	2	2	2	2	2	2	2	2	2
				7	1	2	8	1	2	1	2	1	2	1	1	1	1	1	2	2	1	1
				7	1	2	8	1	4	1	2	2	2	2	2	2	1	1	2	2	2	1
0	0	0	1			2	6	1	4	2	4	2	2	2	1	1	2	2	1	2	2	2
0	0	1	0			2	5	1	4	2	2	2	2	2	1	2	1	2	2	3	3	3	0	0	0	0	0	0	0	0	0	0	0	0	0	0	0	0	0	0	0	0	0	0	0	0	0	0	0
				7	1	2	6	1	4	1	1	2	2	2	2	2	1	1	2	2	1	1
0	0	1	0			2	6	1	4	1	1	2	1	2	2	2	2	2	2	2	2	2
0	0	1	0			2	4	1	4	1	1	2	2	2	2	2	1	2	2	2	2	2
0	0	1	0			2	6	1	2	1	1	2	2	2	2	2	2	2	2	2	2	2
0	0	1	0			2	6	1	4	1	1	2	1	1	2	2	2	1	2	2	2	1
0	0	1	0			2	4	1	4	2	2	2	1	2	2	2	1	1	2	2	2	2
				1	3	2	6	1	4	1	2	2	2	2	2	2	2	2	2	1	1	1
				7	1	2	7	1	4	1	2	2	1	2	1	2	1	1	2	2	2	2
0	0	0	1			2	5	1	4	2	1	2	1	1	2	2	1	2	2	1	2	1
0	0	1	0			2	4	1	4	1	3	1	1	1	1	2	2	1	2	1	2	2
				7	1	2	9	2	4	1	1	2	1	1	2	2	1	1	2	3	2	2	0	0	0	0	0	0	0	0	0	0	0	0	1
0	0	0	1			2	5	1	4	2	3	2	2	1	1	1	1	2	2	3	2	1	1	0	1	0	0	0	0	0	0	0	0	0	0
0	0	1	0			2	7	1	4	2	2	2	2	2	2	2	2	2	2	2	2	2
0	0	1	0			2	9	1	4	1	2	1	2	1	1	2	1	2	2	2	2	2
				7	1	4	4	1	4	3	4	2	1	2	1	1	1	1	2	2	2	2
1	0	0	0			2	6	1	4	2	1	1	1	1	2	2	1	1	2	2	2	2
				1	3	2	6	1	4	0	1	1	2	1	2	2	1	2	2	2	2	2
0	0	1	0			2	5	1	4	1	1	2	1	2	2	2	1	2	2	2	1	2
0	0	1	0			2	6	1	4	2	3	2	2	2	2	2	2	2	2	2	2	2
0	0	0	1			2	6	1	4	2	1	2	2	2	2	2	1	1	2	2	2	2
				7	1	2	5	1	2	3	1	2	2	2	2	2	1	2	2	2	2	2
0	0	1	0			2	6	1	4	1	2	2	2	2	2	1	1	2	2	2	2	2
				7	1	2	5	1	4	2	1	2	1	2	2	2	2	1	2	2	2	2
				7	1	2	6	1	4	2	2	2	2	2	2	2	1	2	2	2	2	1
0	0	1	0			2	8	1	4	1	2	2	1	2	2	2	1	2	2	2	2	2
				7	1	2	4	1	4	1	1	2	1	1	2	2	2	1	2	3	3	3	0	0	1	0	0	0	0	0	1	0	0	0	0	0	0	1	0	0	0	0	0	1	0	0	0	0	0
0	0	1	0			2	3	1	4	2	3	2	1	1	1	2	2	1	2	2	2	1
				7	1	2	6	1	4	1	1	2	2	2	2	2	2	2	2	1	1	1
				7	1	2	9	1	4	1	1	2	2	1	2	2	2	2	2	1	2	1
0	0	1	0			2	7	1	4	2	1	2	2	2	2	2	1	2	2	3	3	3	0	0	0	1	1	0	0	0	0	0	0	0	0	0	0	0	1	1	0	0	0	0	0	0	0	0	0
				7	1	2	9	1	4	4	1	2	2	2	2	2	2	2	2	2	1	1
				7	1	2	1	1	2	2	2	1	1	1	1	1	1	1	2	2	2	2
				4	3	2	6	1	4	0	1	1	2	2	2	2	1	2	2	2	2	2
				7	1	2	6	1	4	2	1	2	1	1	1	2	1	1	2	2	2	2
0	0	1	0			2	4	1	2	2	2	2	1	1	1	2	1	1	2	3	2	2	0	0	0	0	0	0	0	0	0	0	0	0	0
1	0	0	0			2	7	1	4	1	1	1	1	1	2	1	1	1	2	1	2	1
				2	3	2	6	1	4	0	1	1	1	2	2	2	1	1	2	2	2	2
0	0	1	0			2	6	1	4	1	2	2	2	2	2	2	2	2	2	2	2	2
0	0	1	0			2	10	1	4	3	3	2	2	2	2	2	2	2	2	1	2	2
				7	1	2	6	1	4	1	3	1	2	1	1	1	1	1	2	1	2	3																											0
0	0	1	0			2	2	1	4	2	1	2	2	2	2	2	1	1	2	2	2	1
0	0	1	0			2	6	1	4	1	1	1	2	1	2	2	1	2	2	2	2	2
0	0	1	0			2	6	1	4	1	1	1	1	2	1	1	1	1	1	1	2	2
				7	1	2	6	1	4	2	1	2	2	1	2	2	1	1	2	2	2	2
0	0	1	0			2	3	1	2	4	1	2	2	2	2	2	1	2	2	2	2	2
				2	3	2	4	1	4	1	2	1	1	1	1	2	1	1	2	2	2	1
				7	1	2	3	1	4	1	2	2	2	2	1	1	1	2	2	2	2	2
				7	1	2	6	1	4	1	1	2	2	2	2	2	2	2	2	2	2	1
				3	3	2	6	1	4	0	1	1	1	1	2	1	1	1	2	2	2	2
0	0	1	0			2	6	2	4	4	1	2	2	2	2	2	2	2	2	2	2	2
				5	3	2	5	1	4	1	3	1	1	2	1	2	1	2	2	1	2	2
0	0	0	1			2	6	1	2	2	1	2	2	2	2	2	2	2	2	2	2	2
				7	1	2	6	1	4	1	2	2	2	2	1	2	2	1	2	1	2	1
				7	1	2	4	1	4	2	1	2	1	2	2	2	2	2	2	2	2	2
0	0	1	0			2	5	1	4	1	2	2	1	2	1	1	1	1	1	2	2	2
				3	3	2	6	1	4	0	1	1	1	2	2	2	1	2	2	2	2	1
				7	1	2	4	1	4	2	1	2	2	2	2	2	2	2	2	2	2	2
				7	1	2	7	1	4	2	2	2	1	1	1	1	1	1	2	1	1	1
				7	1	2	6	1	4	2	1	1	2	2	1	2	2	1	2	2	2	2
0	0	1	0			2	4	1	4	2	2	2	1	1	1	2	1	2	2	2	2	2
				4	3	2	5	1	4	1	1	2	1	2	2	2	2	2	2	2	2	2
				7	1	2	6	1	4	1	2	2	1	1	1	1	1	2	2	2	1	1
				3	3	2	3	1	4	0	2	1	1	1	2	2	1	2	2	2	2	2
1	0	0	0			2	6	1	4	1	2	2	2	1	1	1	1	1	2	2	2	2
0	0	1	0			2	7	1	4	1	1	2	1	1	2	2	1	1	1	2	2	2
0	0	1	0			2	6	1	4	2	1	2	1	1	2	2	1	1	2	2	2	2
1	0	0	0			2	4	1	4	2	2	2	2	2	2	2	2	2	2	1	2	1
				3	3	2	7	1	4	1	1	2	1	2	2	2	2	1	2	2	2	2
				7	1	2	6	1	2	2	1	2	2	2	2	2	1	2	2	2	2	2
				7	1	2	6	1	4	1	1	2	2	2	2	2	2	2	2	2	2	2
				7	1	2	6	1	4	1	1	2	2	2	2	1	2	2	2	2	1	2
				2	3	2	4	1	4	0	2	1	1	1	1	1	1	1	1	2	2	2
				3	3	2	5	1	4	1	2	2	2	2	2	2	1	2	2	2	2	2
0	0	1	0			2	6	1	4	1	1	1	1	1	2	1	1	1	2	2	2	1
				3	3	2	5	1	4	0	1	1	2	2	2	2	2	2	2	2	2	2
				3	3	2	6	1	4	0	1	2	1	2	2	2	1	1	2	2	2	1
0	0	1	0			2	6	1	4	1	1	2	1	2	2	2	2	1	2	2	3	3														0	0	0	0	0	0	0	0	0	0	0	0	0	0
				7	1	2	6	1	4	1	1	2	1	1	2	2	2	2	2	2	2	2
				7	1	2	5	1	2	1	1	2	2	2	2	2	1	2	2	2	2	2
0	0	1	0			2	6	1	4	2	2	2	2	2	2	2	1	2	2	2	2	2
0	0	1	0			2	6	1	4	2	2	2	1	1	1	1	1	1	2	1	2	2
0	0	1	0			2	5	1	4	1	4	1	1	1	1	2	1	1	2	1	1	3																											0
0	0	1	0			2	6	1	4	2	1	2	2	2	2	2	1	1	2	2	2	2
				2	3	2	3	1	4	2	1	2	2	2	2	2	2	2	2	2	2	2
				7	1	2	4	2	4	1	1	2	2	2	2	2	1	2	2	2	2	2
				7	1	2	6	1	2	2	1	2	2	1	2	2	1	2	2	1	2	1
				3	3	2	6	1	4	1	1	1	2	2	2	1	1	1	2	2	2	2
0	0	1	0			2	3	1	4	2	2	1	1	1	1	1	1	2	2	1	1	1
				7	1	3	3	1	4	2	1	2	1	2	2	2	2	1	2	2	2	2
				3	3	2	5	1	4	2	1	1	1	1	2	2	1	1	2	2	2	2
0	0	0	1			2	5	1	2	2	4	2	1	1	1	1	1	1	2	1	3	3														0	0	0	0	0	0	0	0	0	0	0	1	0	0
				1	3	2	3	1	4	2	1	2	1	1	2	2	1	2	2	2	2	1
				7	1	2	5	1	4	2	2	2	1	2	2	2	1	2	2	2	2	2
				7	1	2	5	1	4	1	2	1	1	1	1	1	1	1	1	3	2	2	1	0	1	0	1	0	0	0	1	0	1	0	0
0	0	1	0			2	3	1	4	1	2	2	2	2	2	2	2	2	2	3	3	3	0	1	0	0	0	0	0	0	0	0	0	0	0	0	1	0	0	0	0	0	0	0	0	0	0	0	0
				7	1	2	6	1	4	1	3	2	2	2	1	1	1	1	2	3	2	3	0	0	1	0	0	0	0	0	0	0	0	0	0														0
0	0	1	0			2	9	1	4	1	3	2	2	2	1	2	1	1	2	2	2	2
0	0	1	0			2	6	1	4	1	1	2	2	2	2	2	1	1	2	2	2	2
0	0	1	0			2	6	1	4	2	1	2	2	2	2	2	2	2	2	2	2	2
				7	1	2	6	1	4	2	3	2	1	1	1	1	1	2	2	2	2	2
				3	3	2	8	1	2	0	3	2	2	2	2	2	2	2	2	3	3	3	0	0	0	0	0	0	0	0	1	0	1	0	0	0	0	0	0	0	0	0	0	0	0	0	0	1	0
				5	3	2	4	1	4	0	1	1	1	1	2	2	1	1	1	2	2	1
				4	3	2	3	1	4	0	1	1	1	2	2	2	2	1	1	2	2	1
				7	1	2	3	2	4	2	2	2	1	1	1	1	1	1	2	2	2	2
				7	1	2	2	1	4	3	1	2	1	1	1	1	1	2	2	2	2	2
0	0	1	0			2	6	1	4	2	1	2	2	2	2	1	1	2	2	2	2	1
				7	1	2	4	1	4	3	2	2	1	1	1	1	1	1	2	2	2	2
0	0	1	0			2	5	1	2	2	1	2	2	2	2	2	2	2	2	2	2	2
				7	2	2	1	1	4	4	1	2	2	2	2	2	2	2	2	2	2	2
				7	1	2	7	1	4	2	1	2	2	2	2	2	1	1	2	2	2	1
				7	2	2	6	1	4	2	1	2	2	2	2	2	1	2	2	2	2	2
				5	3	2	5	1	4	0	2	1	2	2	2	1	1	2	2	2	2	1
				3	3	2	6	1	2	0	1	1	1	1	2	2	1	1	2	2	2	1
				4	3	2	6	1	4	0	1	1	1	1	2	2	1	2	2	2	2	1
0	0	1	0			2	9	1	4	2	2	2	2	2	1	1	1	1	2	2	2	2
0	0	1	0			2	1	1	4	1	1	1	1	1	2	1	1	1	2	2	2	2
				7	1	2	4	1	4	2	2	2	1	2	2	2	1	1	2	1	2	1
1	0	0	0			2	7	1	4	0	1	1	2	1	2	2	1	2	2	2	2	1
0	0	1	0			2	4	1	4	2	2	1	2	2	2	2	1	1	1	3	3	3	0	0	0	0	1	0	0	0	0	0	0	0	0	0	0	0	0	0	0	0	0	1	0	0	0	0	0
				7	1	2	3	1	4	1	2	1	1	1	1	2	2	1	2	2	2	2
0	0	1	0			2	6	1	4	2	2	2	2	2	2	2	1	1	2	2	1	1
0	0	1	0			2	4	1	4	1	2	2	1	2	1	1	1	2	2	2	2	2
0	0	1	0			2	6	1	4	1	2	2	1	1	1	1	1	1	1	1	2	1
				7	1	2	6	1	4	2	1	1	1	1	1	1	1	1	2	1	1	1
				7	1	2	4	2	2	1	1	2	1	2	2	2	2	2	2	2	2	2
				7	1	2	3	1	4	1	1	1	1	2	1	1	1	2	2	1	2	1
				7	1	2	6	1	4	2	1	2	2	2	2	2	2	2	2	2	1	2
0	0	1	0			2	6	1	4	1	1	2	2	2	2	2	1	1	2	2	2	1
0	0	1	0			2	7	1	4	2	2	2	2	2	2	2	1	1	2	2	2	2
				5	3	2	6	1	4	1	3	2	1	2	2	2	1	2	2	2	2	2
				7	1	2	6	1	4	2	1	2	1	2	2	2	1	1	2	2	2	2
				5	3	2	4	1	4	1	2	1	2	2	2	2	2	2	2	2	2	2
0	0	1	0			2	5	1	4	3	2	2	1	1	1	2	1	2	2	2	2	2
				7	1	2	6	1	4	3	1	2	2	1	1	1	1	1	2	2	2	2
0	0	1	0			2	5	1	4	3	2	2	2	2	2	2	2	2	2	2	2	2
0	0	1	0			2	2	1	2	2	1	2	2	2	2	2	2	2	2	3	3	3	0	0	0	0	0	0	0	0	0	0	0	0	0	0	0	0	0	0	0	0	0	0	0	0	0	0	0
0	0	1	0			2	9	1	4	2	1	1	2	2	1	2	1	1	2	2	2	2
0	0	1	0			2	6	1	4	1	1	2	2	2	2	2	2	2	2	2	2	2
0	0	1	0			2	3	1	4	5	1	2	1	2	2	2	1	2	2	2	2	2
				7	1	2	4	1	4	1	1	2	1	2	2	2	1	1	1	2	1	1
				7	1	2	3	1	4	1	2	1	1	1	1	2	1	2	2	2	2	2
				7	1	2	8	1	4	1	1	2	2	1	2	2	1	1	2	1	2	2
1	0	0	0			2	7	1	2	0	1	1	2	1	2	2	2	1	2	2	2	2
0	0	1	0			3	3	1	4	1	2	2	2	2	2	2	2	2	2	1	2	2
0	0	1	0			2	6	1	2	1	1	1	2	1	2	1	1	2	2	2	2	1
				7	1	3	6	1	4	2	2	2	2	1	2	2	1	2	2	2	2	1
				7	1	2	4	1	4	2	1	1	2	2	2	2	1	2	2	2	2	2
				5	3	2	7	1	2	0	2	2	1	2	2	2	1	2	2	3	3	2	1	0	0	0	0	0	0	0	0	0	0	0	0	0	0	1	0	0	0	0	0	0	0	0	0	0
				7	1	2	5	1	4	2	1	2	1	1	2	2	1	1	2	2	3	3														0	0	0	0	0	0	1	0	0	0	0	0	0	0
				7	1	2	6	1	2	1	1	2	2	2	2	2	1	1	2	2	2	2
				1	3	2	4	1	4	2	2	2	1	1	1	1	2	1	2	2	3	2														0	0	0	1	0	0	0	0	0	0	0	0	0
0	0	1	0			2	5	1	4	3	2	2	1	1	1	2	1	2	2	1	2	1
0	0	1	0			2	6	1	4	4	3	2	1	1	1	2	1	2	2	2	2	2
0	0	0	1			2	6	1	4	2	1	2	1	2	2	2	2	2	2	1	1	3																											0
				7	1	2	4	1	4	1	1	2	1	1	2	2	1	1	2	2	1	2
				7	1	2	4	1	4	1	1	2	2	2	2	2	2	1	2	2	2	2
				7	1	2	6	1	4	2	1	2	2	2	2	2	2	2	2	2	2	1
				3	3	2	6	1	4	0	1	2	2	2	2	2	2	2	2	2	2	2
0	0	1	0			2	6	1	4	2	1	1	1	1	2	2	1	2	2	2	2	2
				5	3	2	9	1	4	1	2	1	2	1	2	2	1	2	2	2	2	2
0	0	1	0			2	7	1	4	1	1	1	2	2	2	2	1	2	2	2	2	1
				7	1	2	4	1	4	1	2	2	1	1	1	1	1	2	2	2	2	2
0	0	1	0			2	5	1	4	1	1	2	1	2	2	2	1	2	2	2	2	2
				7	1	2	6	1	4	3	1	2	1	1	2	2	1	1	2	2	2	2
				7	1	2	4	1	4	1	2	2	2	1	1	2	2	2	1	2	2	2
0	0	1	0			2	6	1	4	2	2	2	2	2	2	2	1	2	2	1	2	2
				7	1	2	6	1	4	1	3	2	2	2	2	1	1	2	2	2	2	2
0	0	1	0			2	7	1	4	2	1	2	2	2	2	2	2	2	2	1	2	1
				7	1	2	6	1	4	1	1	2	2	2	2	2	1	2	2	1	3	1														0	0	0	0	0	0	0	0	0	0	0	0	0
				3	3	2	2	1	4	1	2	1	1	2	1	2	1	1	2	2	2	2
				7	1	2	5	1	4	1	2	1	1	1	1	2	2	1	2	2	2	1
0	0	1	0			2	4	1	4	1	1	2	2	2	2	2	2	2	2	2	2	2
0	0	1	0			2	3	1	4	1	1	2	2	2	2	2	2	2	1	2	1	1
0	0	1	0			4	5	1	4	2	2	2	1	2	2	2	2	2	1	2	1	2
				7	1	2	7	1	4	1	2	1	2	1	2	1	2	1	2	2	1	2
				7	1	2	6	1	4	2	1	2	1	2	2	2	1	2	2	1	2	2
0	0	0	1			2	6	1	4	2	1	2	2	2	2	2	1	2	2	1	2	3																											1
0	0	0	1			2	6	1	2	2	1	2	2	2	2	2	1	2	2	2	2	1
				4	3	2	3	1	4	0	1	1	1	1	2	1	1	2	2	2	2	2
1	0	0	0			2	6	1	4	2	2	2	2	2	2	2	1	2	2	2	2	2
				7	1	2	5	1	4	1	1	1	2	2	2	2	1	1	2	1	2	2
				7	1	2	5	1	4	2	2	2	2	2	2	2	2	2	2	2	2	2
				7	1	2	4	1	4	2	1	2	1	2	2	2	2	1	2	2	1	2
				7	1	2	4	1	4	4	2	2	1	2	2	2	2	2	2	2	2	2
				7	1	2	4	1	4	1	1	2	1	2	2	2	1	1	2	2	3	1														1	1	1	0	0	0	1	0	0	0	0	0	0
				3	3	2	5	1	4	0	1	1	1	2	2	2	2	1	2	2	2	1
				7	1	2	5	1	4	1	2	2	2	2	2	2	2	2	2	1	3	2														0	0	1	0	0	0	0	0	0	0	0	0	0
				7	1	2	6	1	4	1	1	2	2	1	1	1	1	1	2	2	2	2
				7	1	2	6	1	4	3	4	2	1	2	2	2	1	2	2	1	1	2
				7	1	2	5	1	4	2	2	2	1	2	1	2	2	2	2	2	2	2
0	0	1	0			2	8	1	4	2	1	2	1	2	2	2	1	2	2	2	2	2
				5	3	2	6	1	4	0	1	1	1	1	1	1	1	1	1	2	2	2
				7	1	2	4	1	4	1	1	1	1	2	2	2	2	1	2	1	2	1
				7	1	2	6	1	4	1	1	2	2	1	1	1	1	2	2	2	3	2														0	1	0	1	0	0	0	0	0	0	0	0	0
				4	3	2	8	1	4	2	1	1	1	1	1	1	1	2	2	1	1	1
				7	1	2	7	1	4	1	1	1	1	1	2	2	1	1	2	2	2	2
				4	3	2	4	1	4	0	2	1	1	1	1	2	1	1	2	2	2	1
0	0	1	0			2	4	1	4	3	2	2	1	2	1	1	1	2	2	2	2	1
0	0	1	0			2	6	1	4	1	1	2	2	2	2	2	2	2	2	2	2	2
				7	1	2	4	1	4	1	1	2	1	1	1	2	1	2	2	3	2	2	1	1	1	0	1	0	0	0	0	0	0	0	0
0	0	1	0			2	2	1	4	1	1	1	1	1	1	1	1	1	2	1	2	1
0	0	1	0			2	8	1	4	2	1	2	2	2	2	2	2	2	2	2	2	1
0	0	1	0			2	6	1	4	2	1	2	1	1	2	1	2	2	2	2	2	2
				7	1	2	3	1	4	1	1	1	1	1	2	1	1	1	2	2	2	2
				3	3	2	6	1	4	2	1	2	2	2	2	2	2	2	2	2	2	2
1	0	0	0			2	6	1	2	1	1	1	2	2	2	2	1	1	2	1	1	3																											0
				5	3	2	6	1	4	0	1	1	1	1	2	2	1	1	2	2	2	2
				7	1	2	4	1	4	3	1	1	2	1	1	1	1	1	2	3	3	3	0	0	0	0	0	0	0	1	0	0	0	0	0	0	0	0	0	0	0	0	1	0	0	0	0	0	0
0	0	1	0			2	3	1	4	2	1	1	1	1	2	2	2	1	2	2	2	2
0	0	1	0			2	7	1	4	1	1	2	2	2	2	2	2	2	2	1	2	2
0	0	1	0			2	6	1	4	1	1	2	1	2	1	2	1	1	2	2	2	2
[truncated: 6,048 more rows]
[truncated: 48 more columns]
